# Supplementary material
Source: MDPI journal article supplement (https://www.mdpi.com/2304-6740/10/11/214)
Supplement: s1 [file s1]

## Supplementary Materials

### **Convenient Access to Ferrocene Fused *aza*-Heterocycles via the Intramolecular Ritter Reaction: Synthesis of Novel Racemic Planar-Chiral 3,4-Dihydroferroceno[*c*]pyridines and 1*H*-Ferroceno[*c*]pyrroles**

Yuliya S. Rozhkova\*, Irina V. Plekhanova, Alexey A. Gorbunov, Yurii V. Shklyayev\*

*Institute of Technical Chemistry UB RAS, 3 Akademik Korolev St., Perm 614013, Russian Federation*

\*Corresponding Author's E-mail Addresses: yushka49@mail.ru, rjs@mail.ru

## Table of contents

|                                                                                                                                                    |     |
|----------------------------------------------------------------------------------------------------------------------------------------------------|-----|
| 1. $^1\text{H}$ NMR monitoring of the conversion of thioimine <b>11g</b> to enaminone <b>3u</b>                                                    | S3  |
| 2. The proposed mechanism for the transformation of thioimine <b>11g</b> to enaminone <b>3u</b>                                                    | S3  |
| 3. The proposed mechanism for the thermolysis of ferroceno[ <i>c</i> ]pyrrole <b>12g</b>                                                           | S4  |
| 4. Copies of NMR spectra                                                                                                                           | S5  |
| Copies of $^1\text{H}$ and $^{13}\text{C}$ NMR spectra for compounds <b>10g, j</b>                                                                 | S5  |
| Copies of $^1\text{H}$ and $^{13}\text{C}$ NMR spectra for compounds <b>3a–m, o–s, u–x</b> ; $^{19}\text{F}$ NMR spectra for compounds <b>3k–m</b> | S7  |
| Copies of $^1\text{H}$ and $^{13}\text{C}$ NMR spectra for compounds <b>8a–c</b> and <b>9a–c</b>                                                   | S31 |
| Copies of $^1\text{H}$ and $^{13}\text{C}$ NMR spectra for compounds <b>11a–g</b>                                                                  | S36 |
| Copies of $^1\text{H}$ and $^{13}\text{C}$ NMR spectra for compounds <b>12a–g</b>                                                                  | S43 |
| Copies of $^1\text{H}$ and $^{13}\text{C}$ NMR spectra for compound <b>4</b>                                                                       | S50 |
| Copies of $^1\text{H}$ and $^{13}\text{C}$ NMR spectra for a mixture of compounds <b>5</b> and <b>6</b>                                            | S51 |
| Copies of $^1\text{H}$ and $^{13}\text{C}$ NMR spectra for compound <b>13</b>                                                                      | S52 |
| Copies of 2D spectra for compounds <b>3a, 3u–x, 11a</b> and <b>12a</b>                                                                             | S53 |

1. Aiming to provide spectroscopic evidence for the spontaneous formation of enaminone **3u** from thioimine **11g**,  $^1\text{H}$  NMR monitoring of the reaction was performed (Figure S1, Table S1).

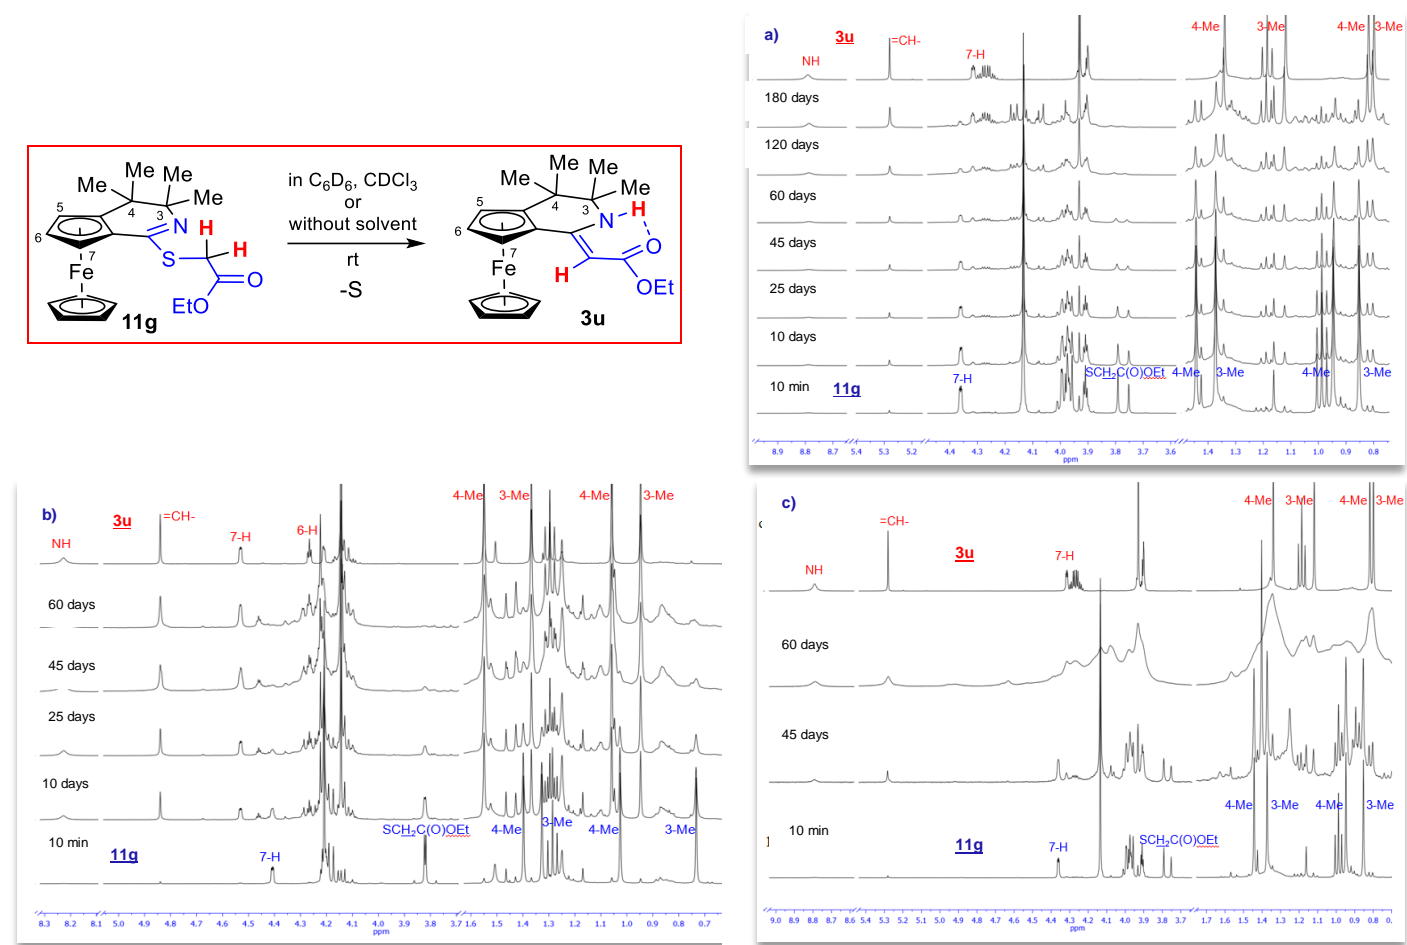

**Figure S1.**  $^1\text{H}$  NMR (400 MHz) monitoring of the conversion of thioimine **11g** to enaminone **3u** at rt. a) in  $\text{C}_6\text{D}_6$  b) in  $\text{CDCl}_3$  c) without solvent,  $^1\text{H}$  NMR spectra were recorded in  $\text{C}_6\text{D}_6$ .

**Table S1.**  $^1\text{H}$  NMR (400 MHz) monitoring of the conversion of thioimine **11g** to enaminone **3u**.<sup>1</sup>

| Ratio of <b>11g</b> / <b>3u</b> <sup>2</sup> |                        |        |         |         |         |         |          |          |
|----------------------------------------------|------------------------|--------|---------|---------|---------|---------|----------|----------|
| Entry                                        | Solvent                | 10 min | 10 days | 25 days | 45 days | 60 days | 120 days | 180 days |
| 1 <sup>3</sup>                               | $\text{C}_6\text{D}_6$ | 96:4   | 88:12   | 84:16   | 79:21   | 70:30   | 50:50    | 31:69    |
| 2 <sup>3</sup>                               | $\text{CDCl}_3$        | 96:4   | 53:47   | 30:70   | 11:89   | 0:100   | -        | -        |
| 3 <sup>4</sup>                               | -                      | 96:4   | 5       | 5       | 80:20   | 6       | -        | -        |

<sup>1</sup> Compound **11g** was obtained in the reaction of alcohol **1** with thiocyanate **10g** at 80 °C (Table 6, entry 2). <sup>2</sup> According to  $^1\text{H}$  NMR analysis. <sup>3</sup> 5 mg of compound **11g** was dissolved in 0.5 mL of deuterated solvent in NMR ampoules. Ampoules with each solution were stored at room temperature. <sup>4</sup> Compound **11g** was stored without solvent at room temperature;  $^1\text{H}$  NMR spectra were recorded in  $\text{C}_6\text{D}_6$ . <sup>5</sup>  $^1\text{H}$  NMR spectrum was not recorded. <sup>6</sup> The ratio of **11g**/**3u** could not be determined because of a great broadening of the signals.

2.

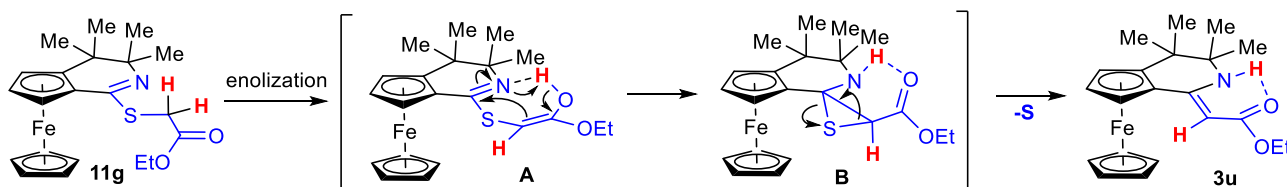

**Scheme S1.** Proposed mechanism for the transformation of thioimine **11g** to enaminone **3u**.

3.

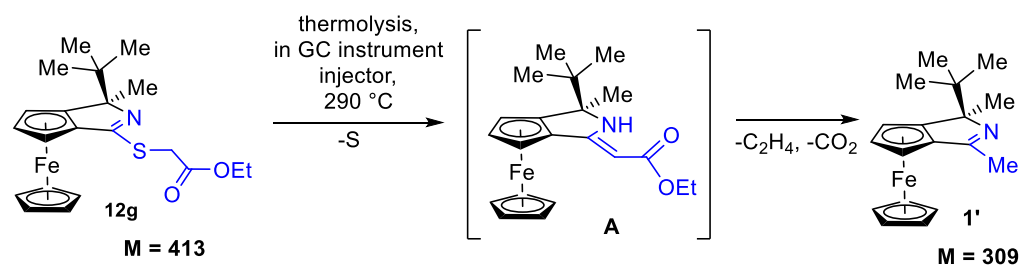

**Scheme S2.** Proposed mechanism for the thermolysis of ferroceno[*c*]pyrrole **12g**.



#### 4. Copies of NMR spectra

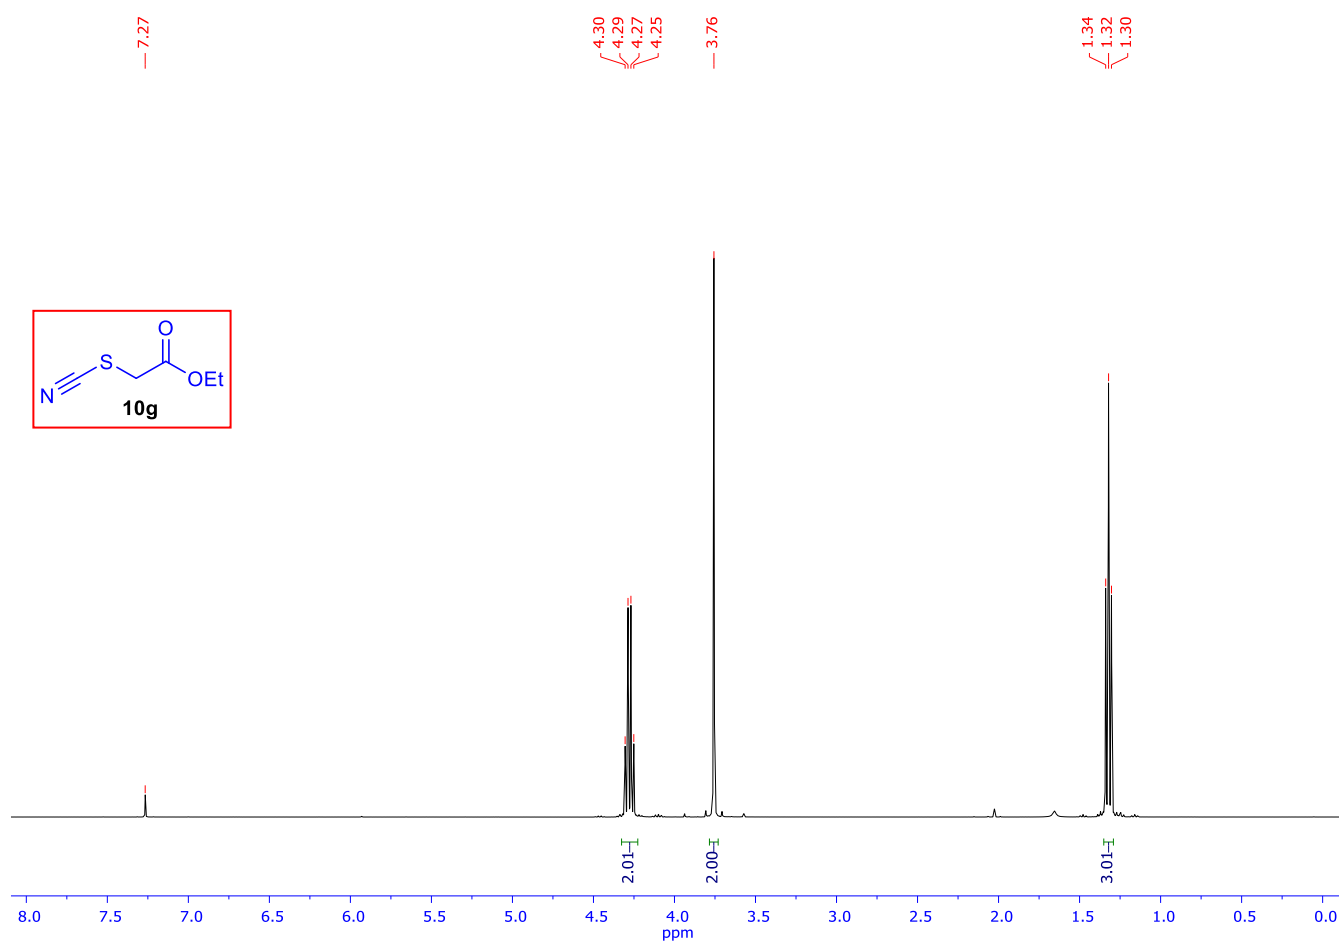

**Figure S2.** <sup>1</sup>H NMR spectrum (400 MHz, CDCl<sub>3</sub>) of compound **10g**.

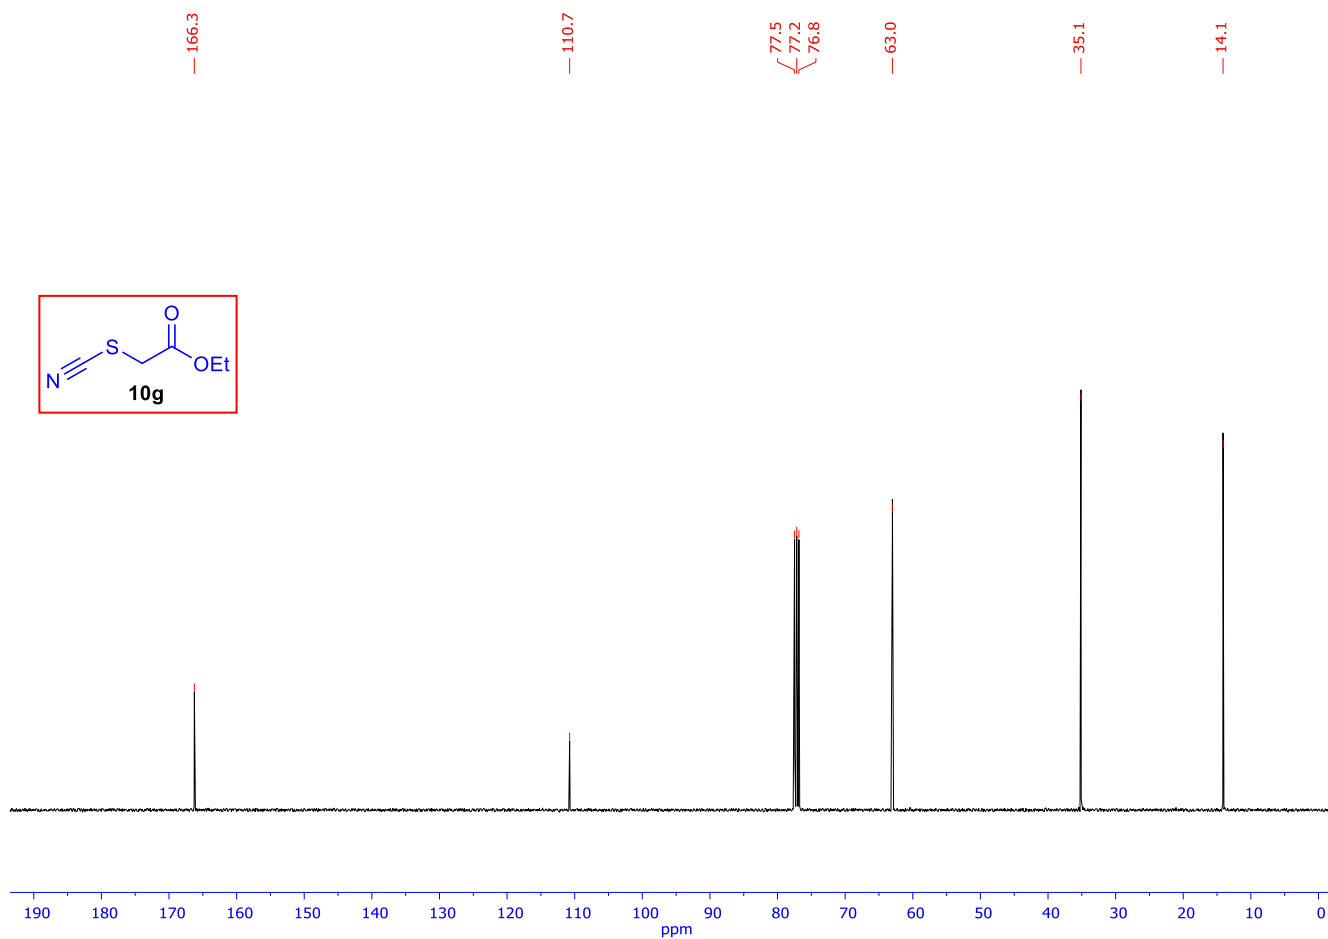

**Figure S3.** <sup>13</sup>C NMR spectrum (100 MHz, CDCl<sub>3</sub>) of compound **10g**.

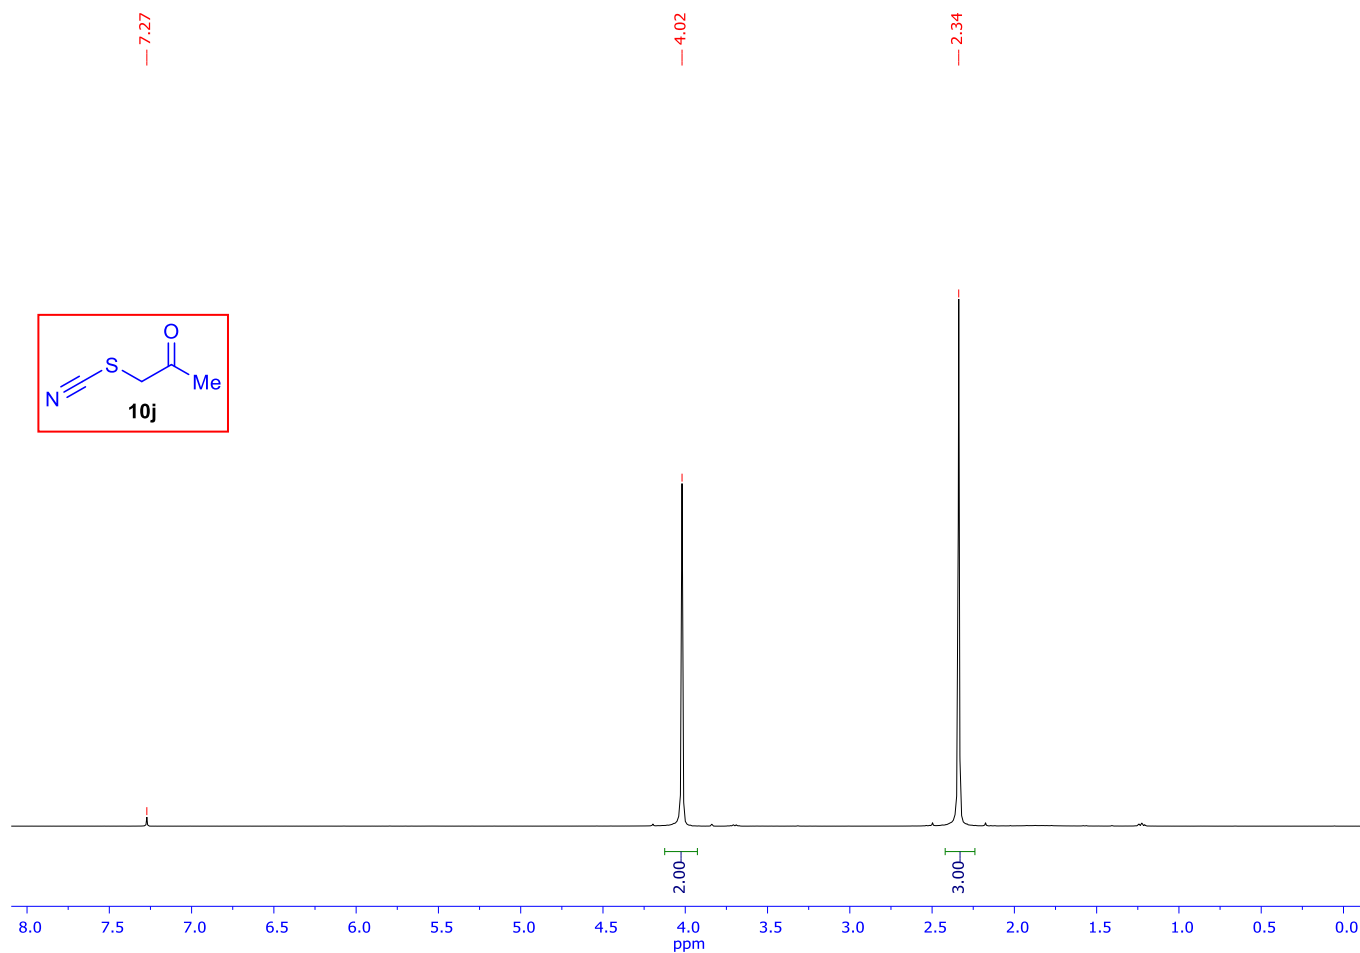

**Figure S4.** <sup>1</sup>H NMR spectrum (400 MHz, CDCl<sub>3</sub>) of compound **10j**.

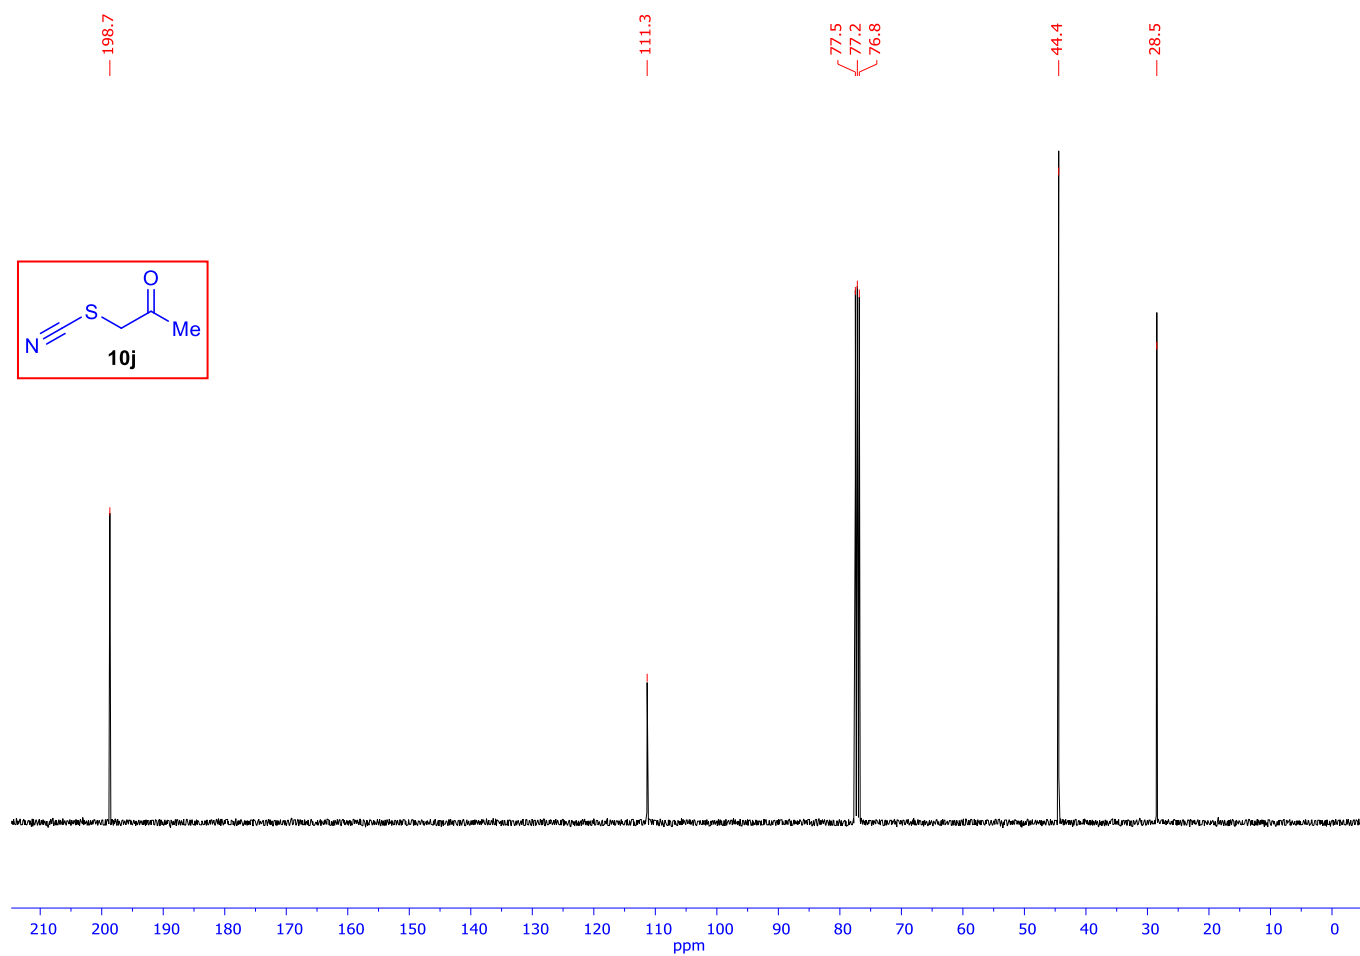

**Figure S5.** <sup>13</sup>C NMR spectrum (100 MHz, CDCl<sub>3</sub>) of compound **10j**.

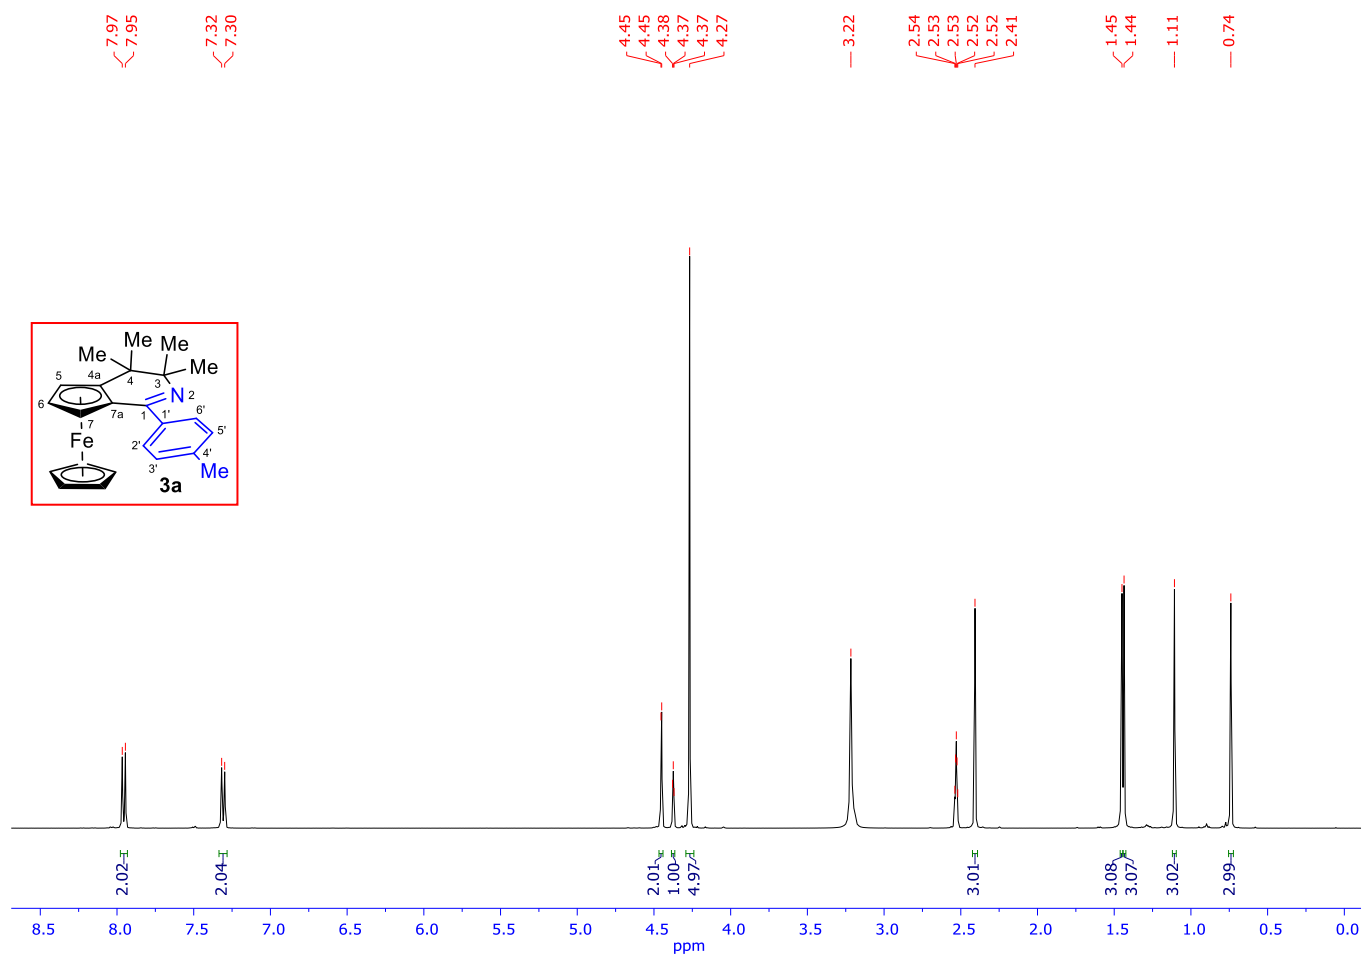

**Figure S6.** <sup>1</sup>H NMR spectrum (400 MHz, DMSO-*d*<sub>6</sub>) of compound **3a**.

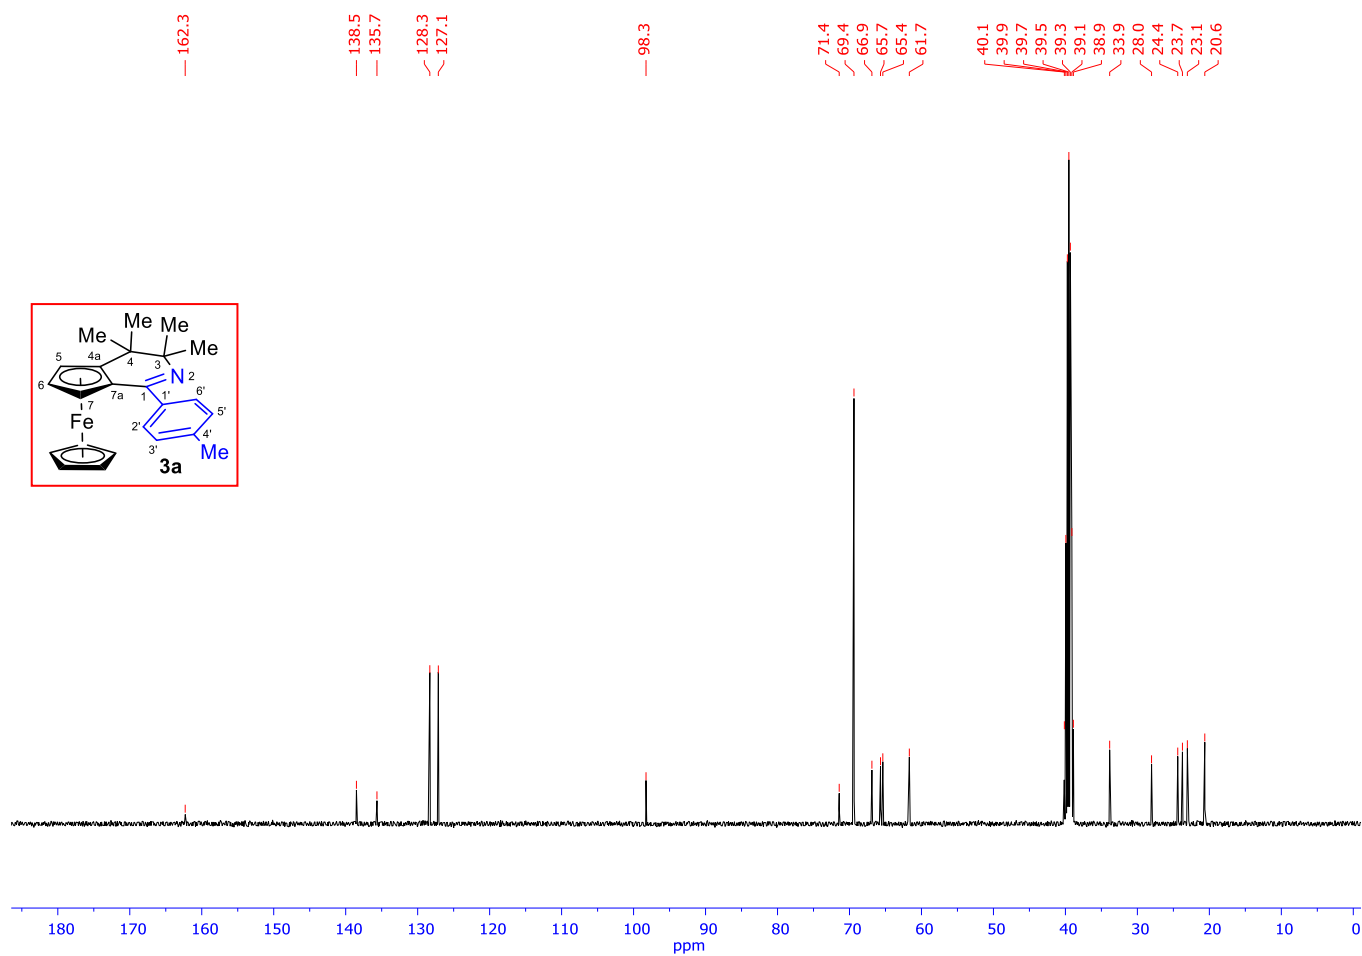

**Figure S7.** <sup>13</sup>C NMR spectrum (100 MHz, DMSO-*d*<sub>6</sub>) of compound **3a**.

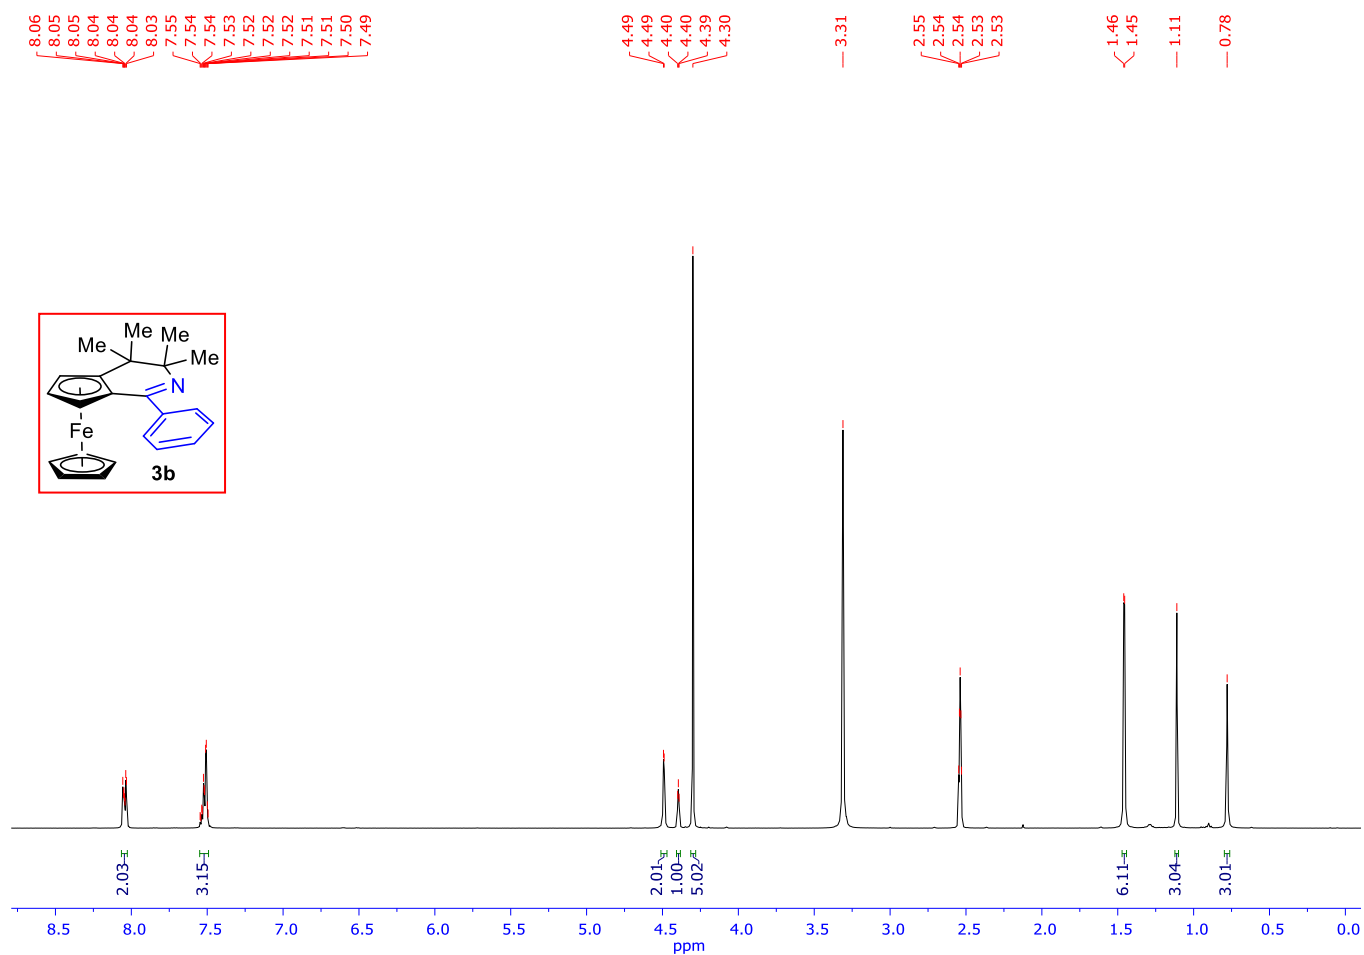

**Figure S8.** <sup>1</sup>H NMR spectrum (400 MHz, DMSO-*d*<sub>6</sub>) of compound **3b**.

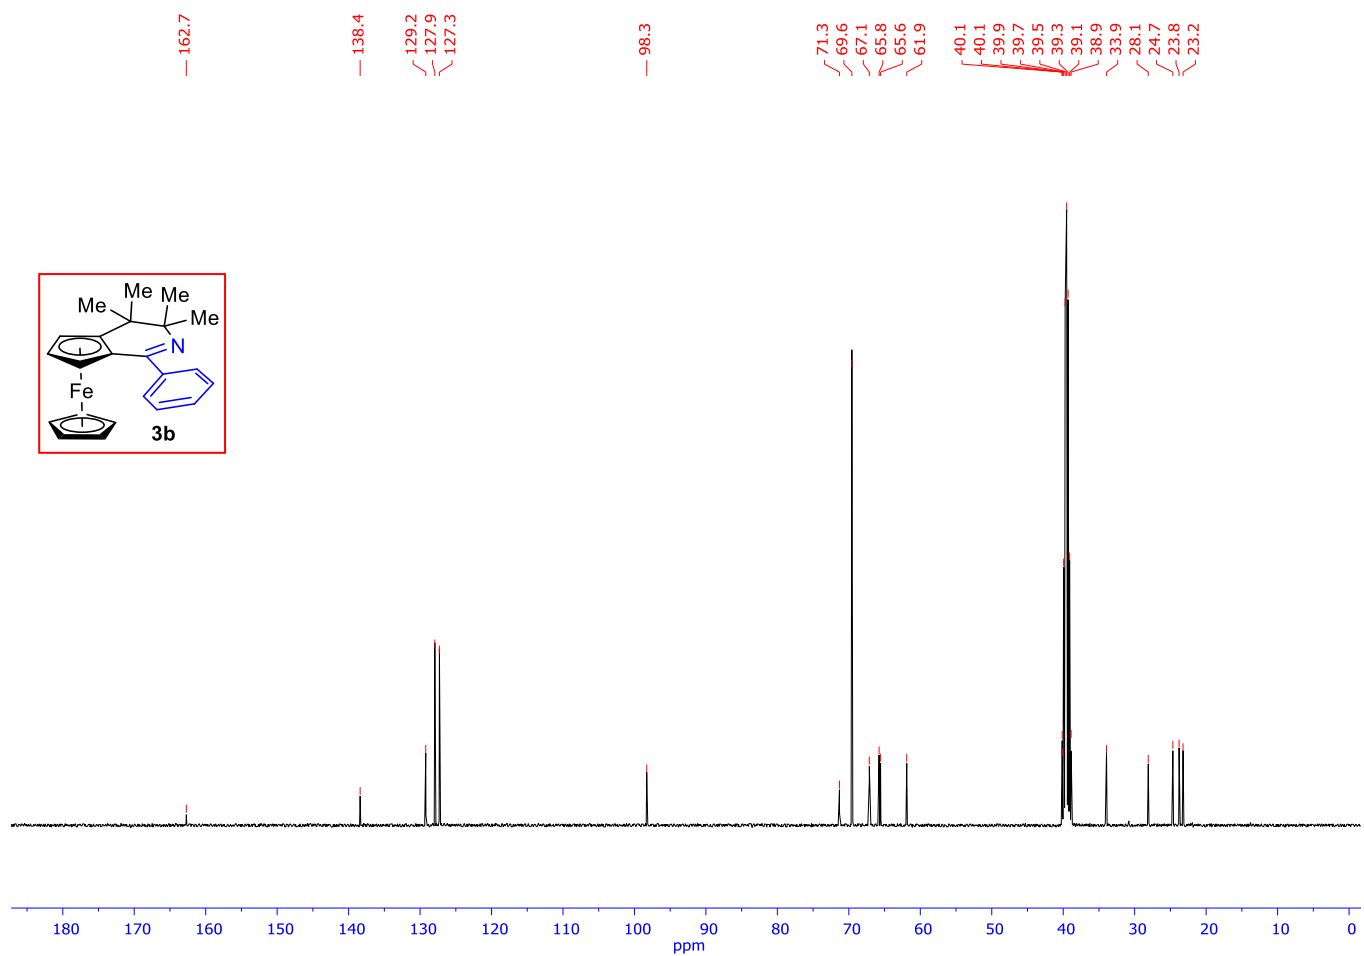

**Figure S9.** <sup>13</sup>C NMR spectrum (100 MHz, DMSO-*d*<sub>6</sub>) of compound **3b**.

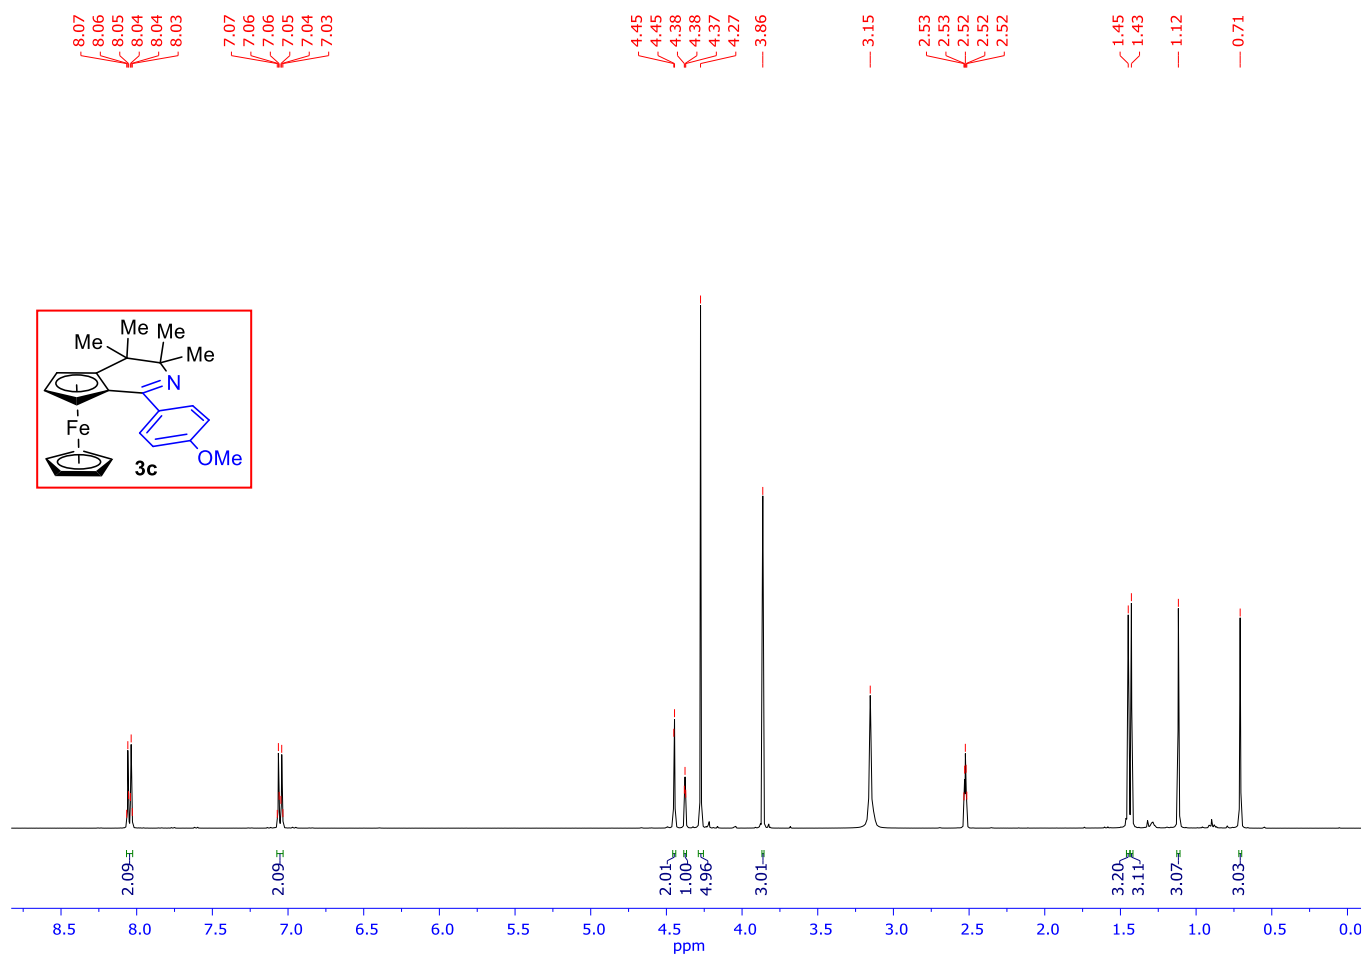

**Figure S10.** <sup>1</sup>H NMR spectrum (400 MHz, DMSO-*d*<sub>6</sub>) of compound **3c**.

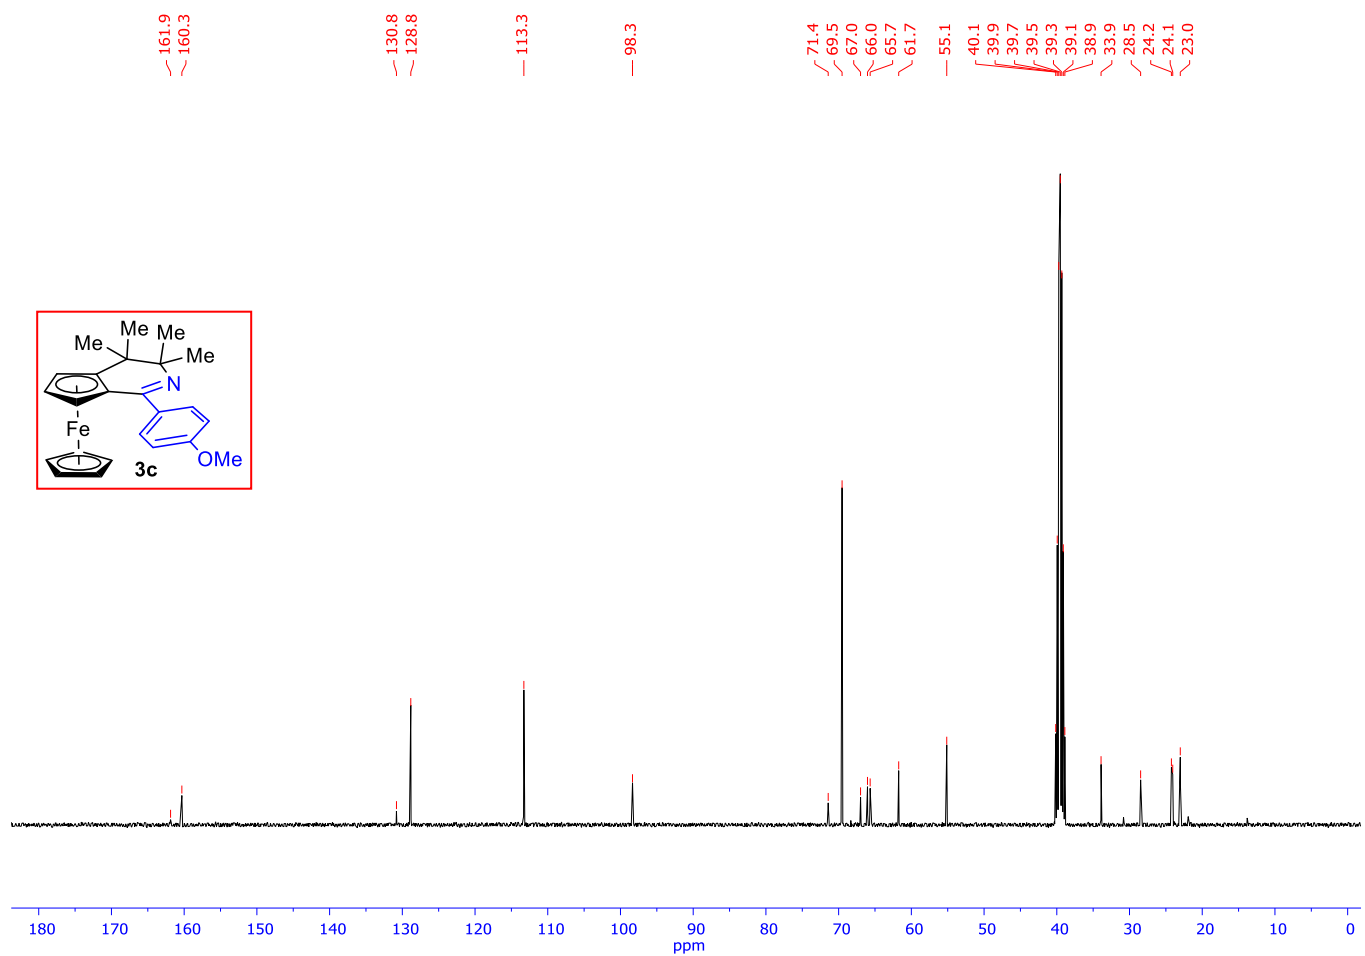

**Figure S11.** <sup>13</sup>C NMR spectrum (100 MHz, DMSO-*d*<sub>6</sub>) of compound **3c**.

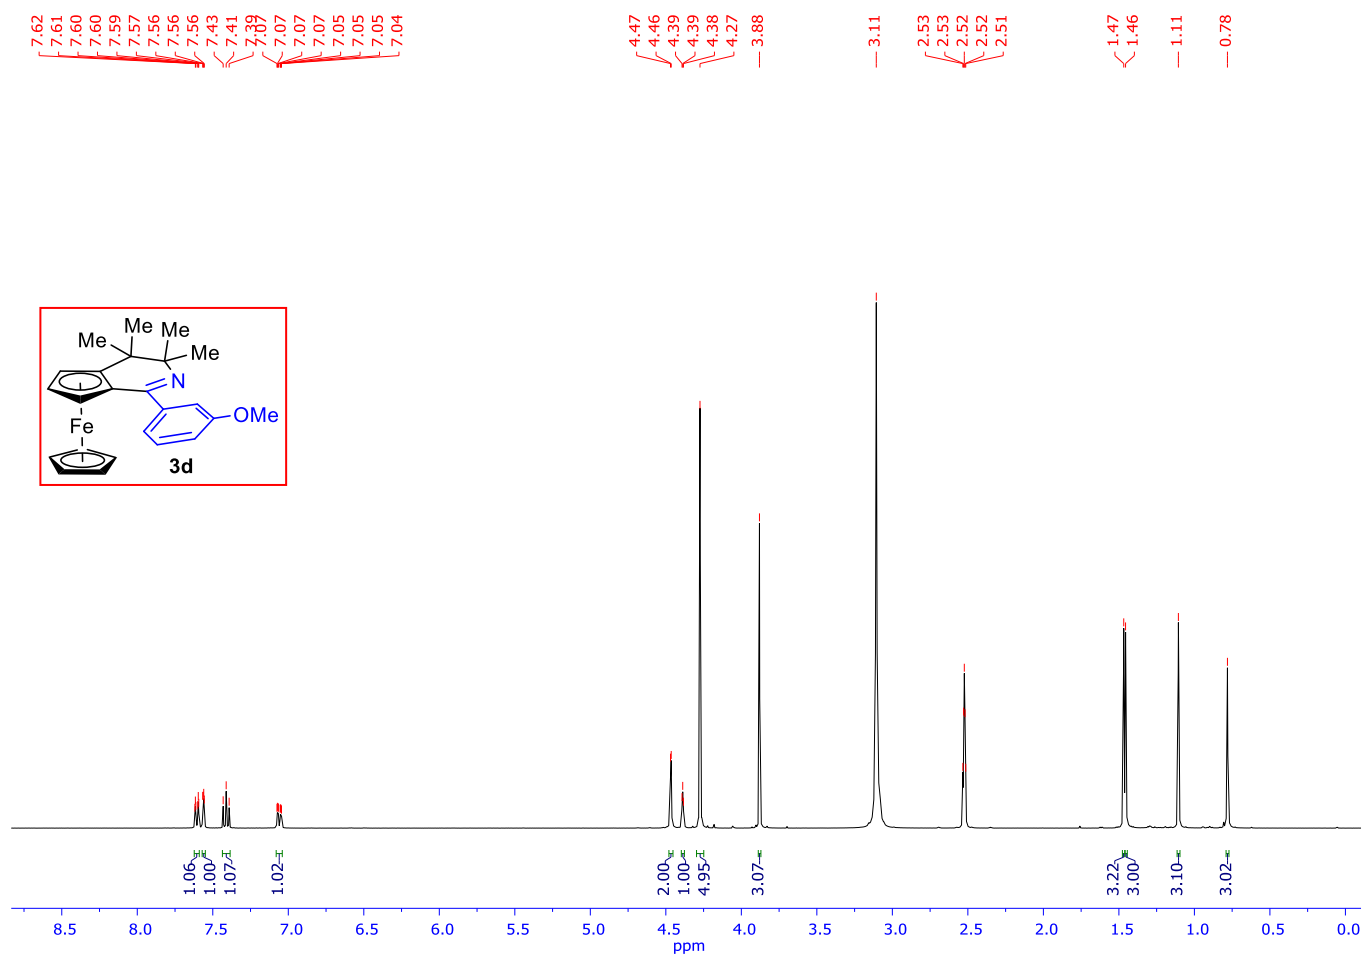

**Figure S12.** <sup>1</sup>H NMR spectrum (400 MHz, DMSO-*d*<sub>6</sub>) of compound **3d**.

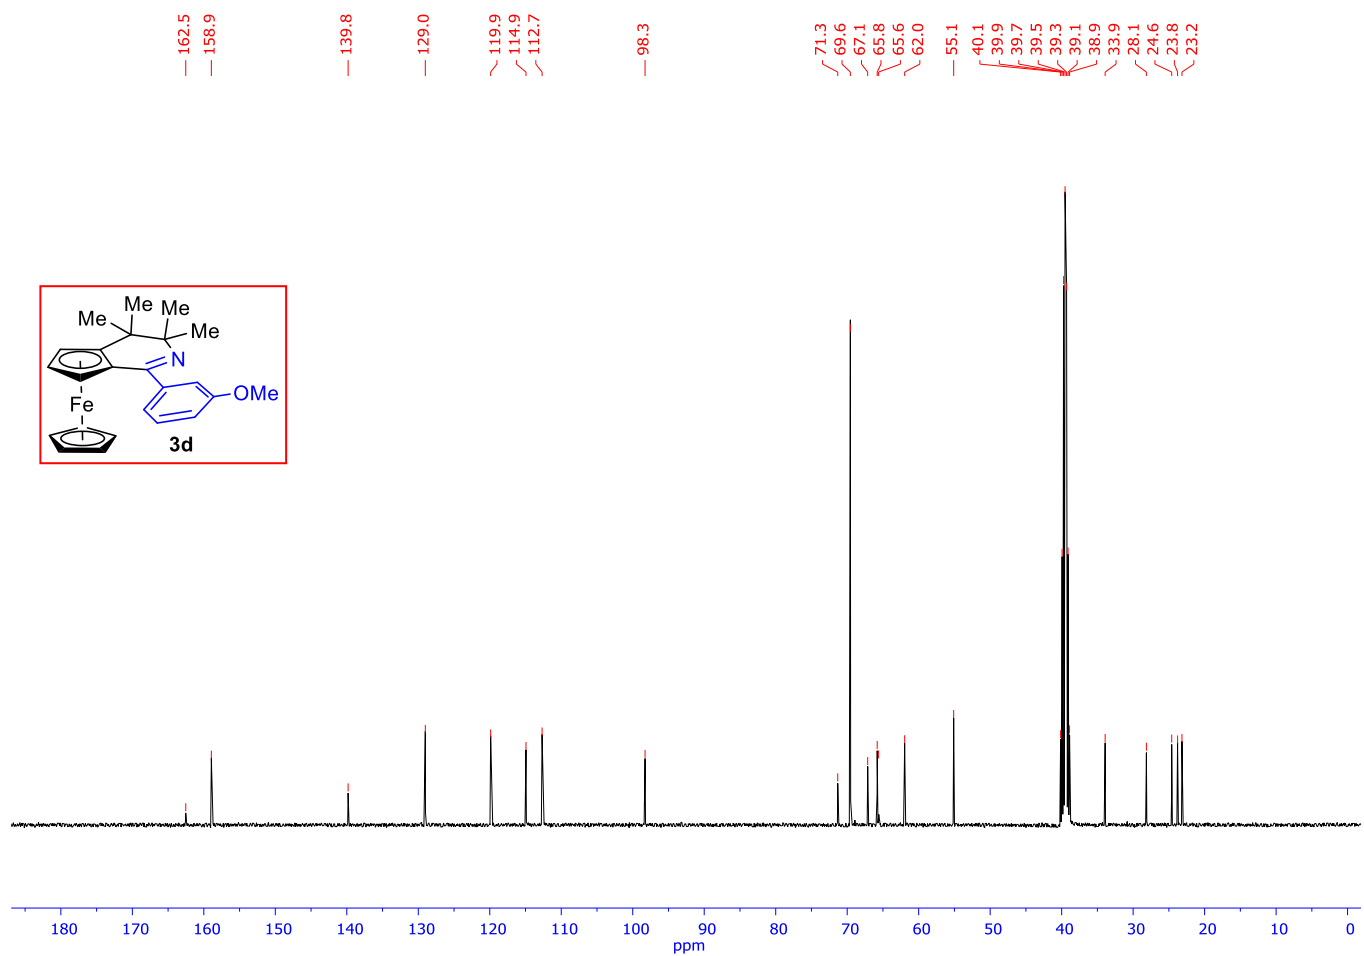

**Figure S13.** <sup>13</sup>C NMR spectrum (100 MHz, DMSO-*d*<sub>6</sub>) of compound **3d**.

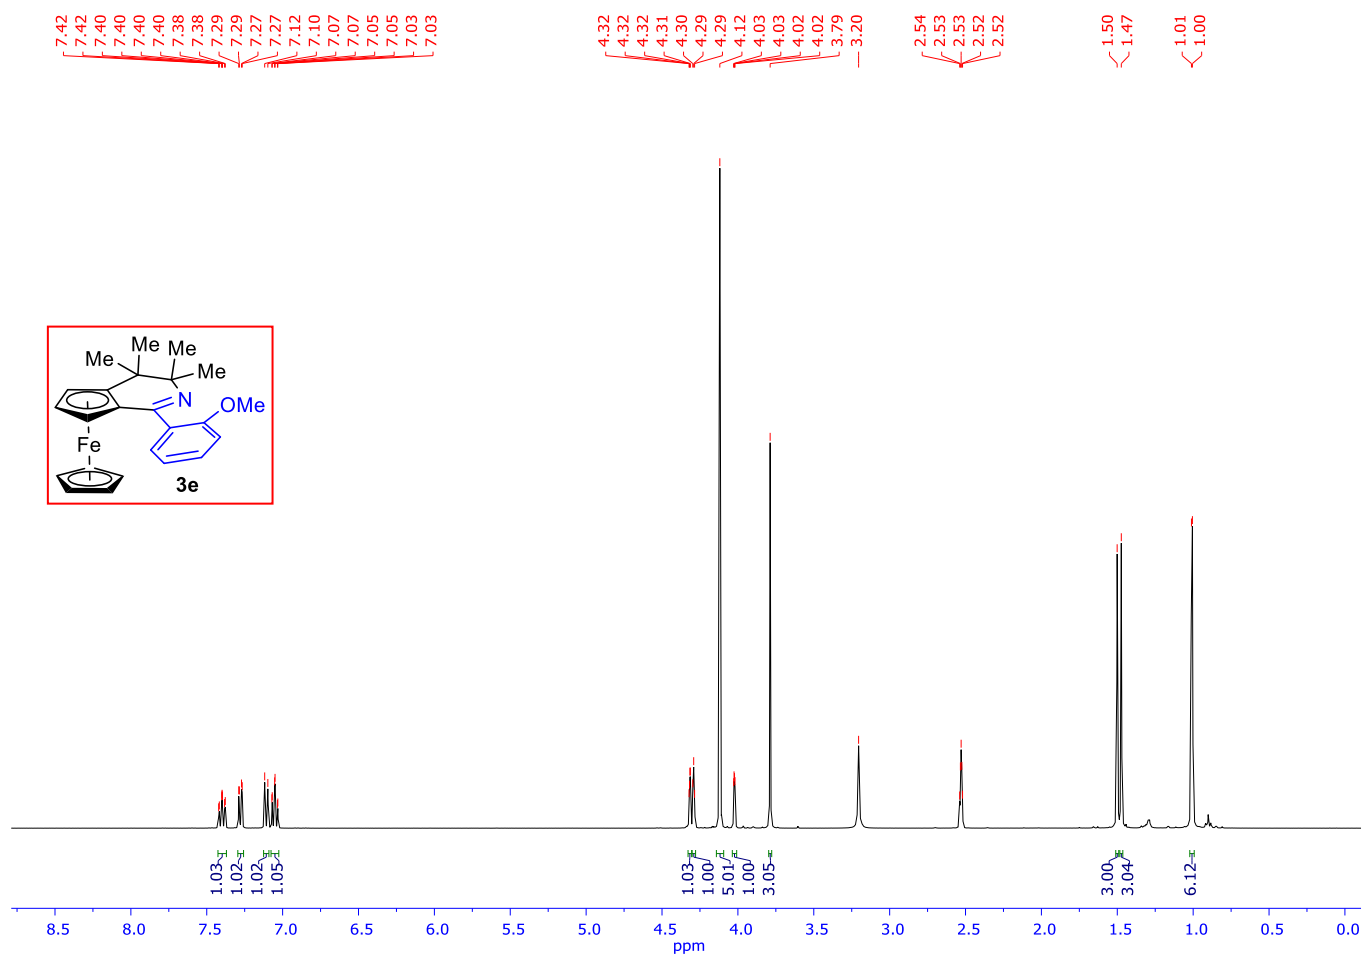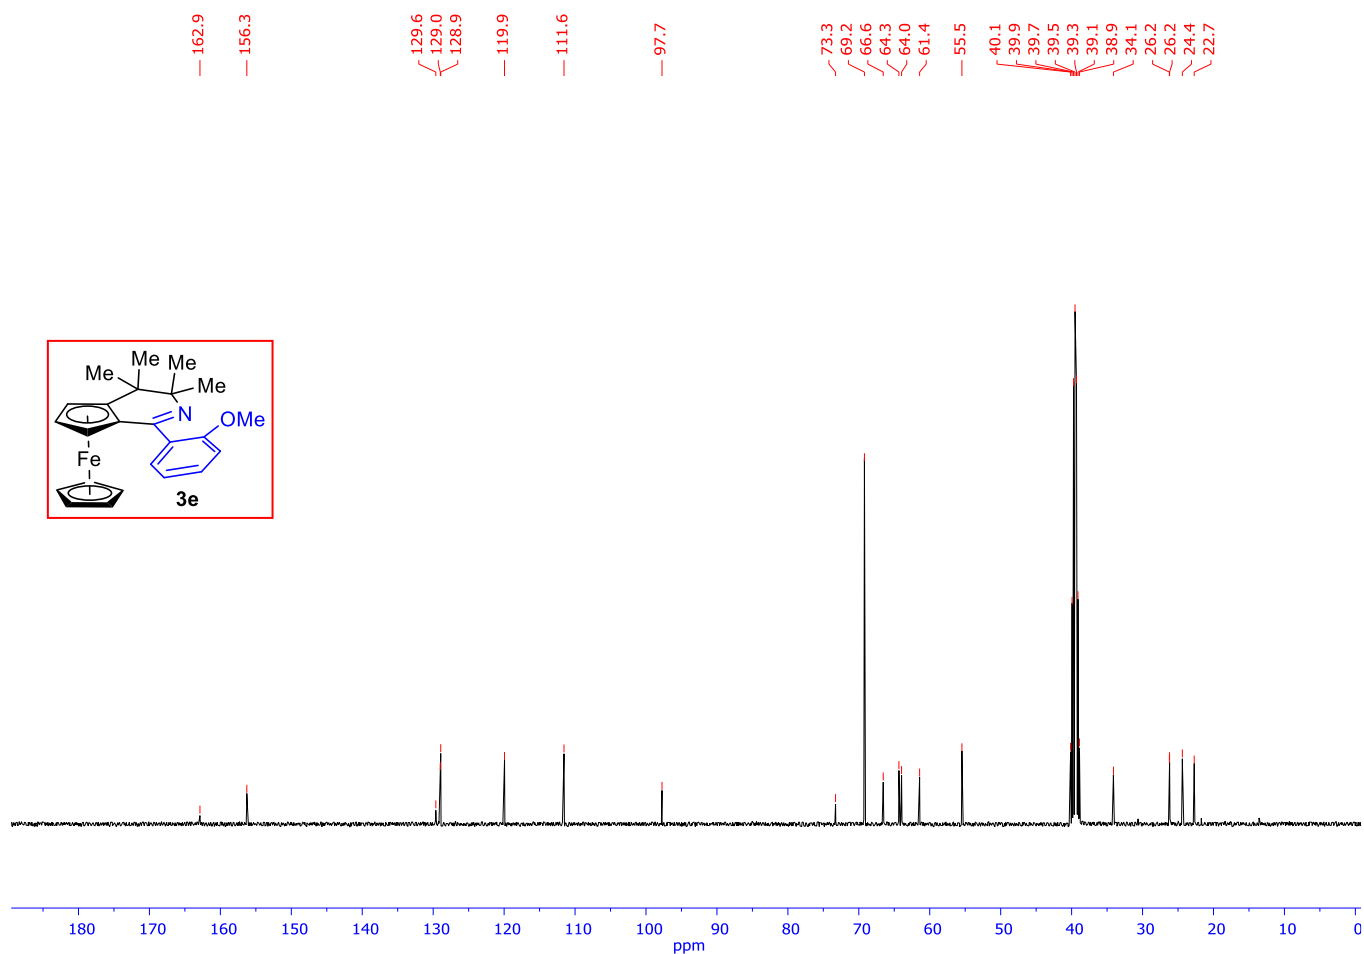

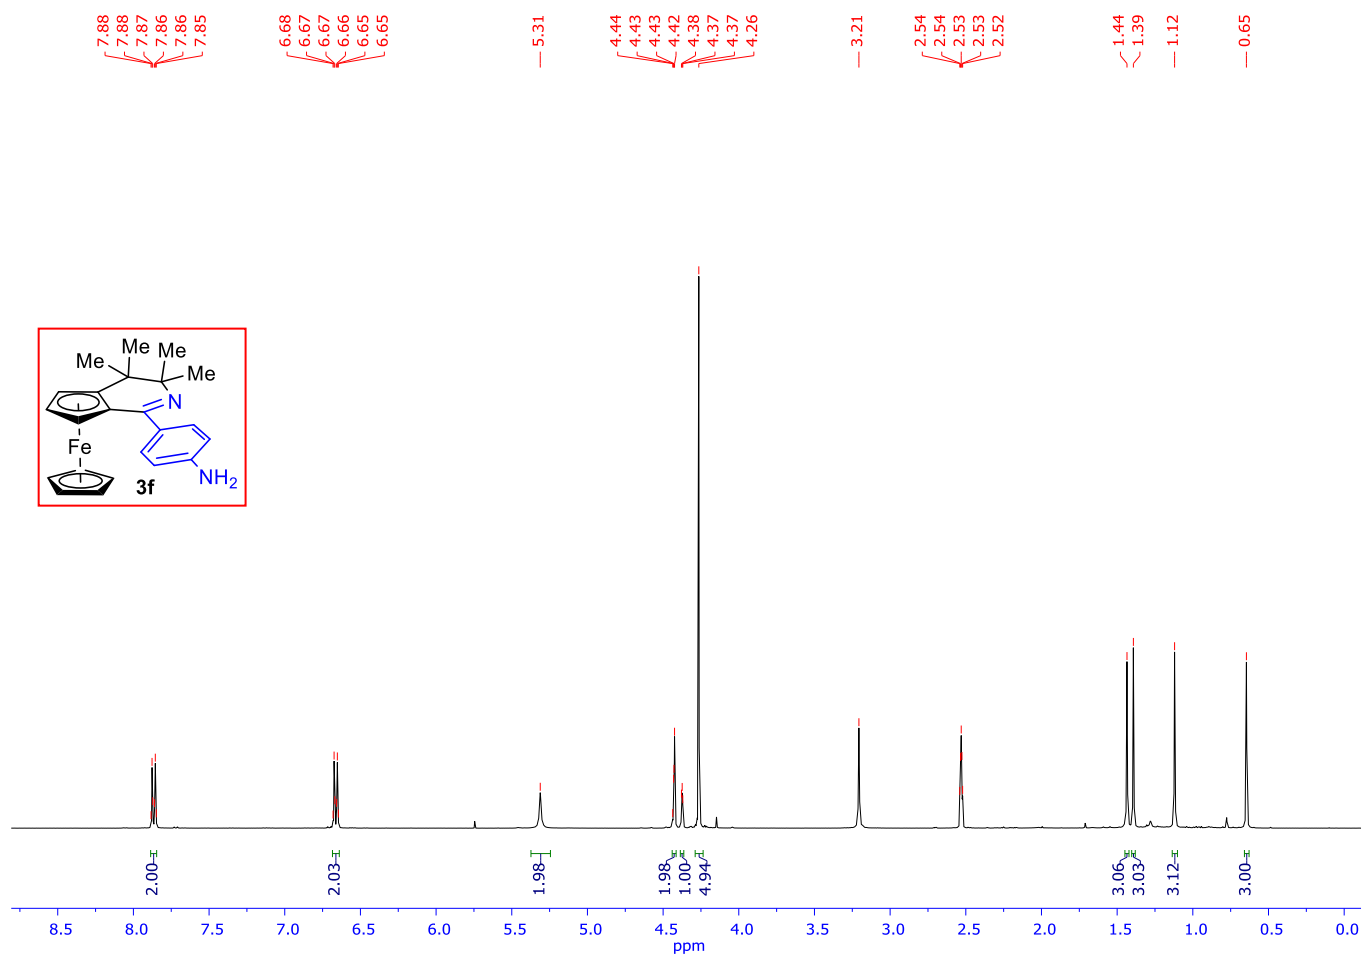

**Figure S16.** <sup>1</sup>H NMR spectrum (400 MHz, DMSO-*d*<sub>6</sub>) of compound **3f**.

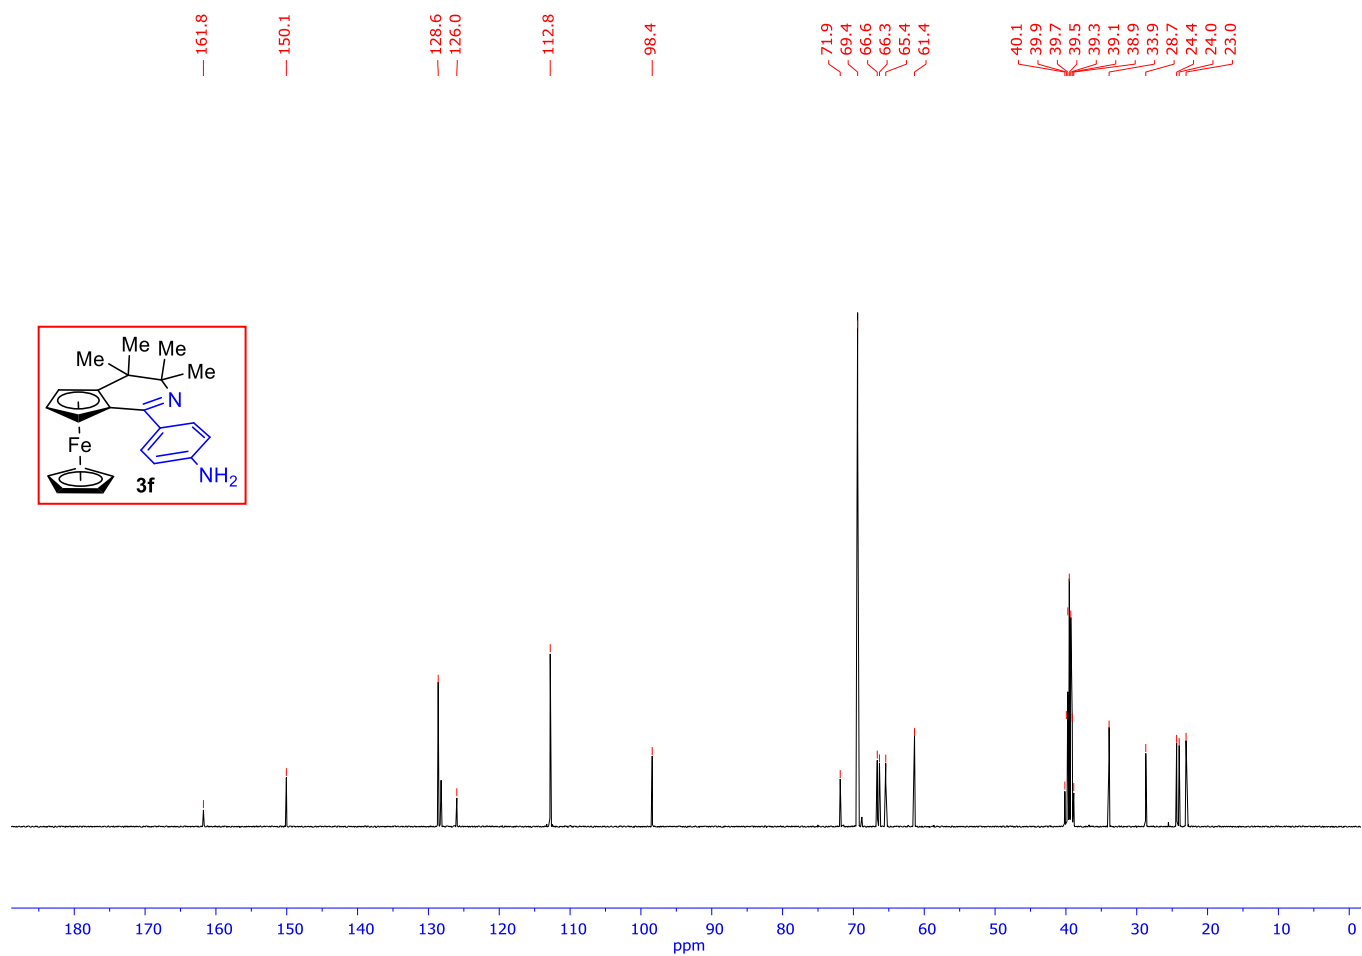

**Figure S17.** <sup>13</sup>C NMR spectrum (100 MHz, DMSO-*d*<sub>6</sub>) of compound **3f**.



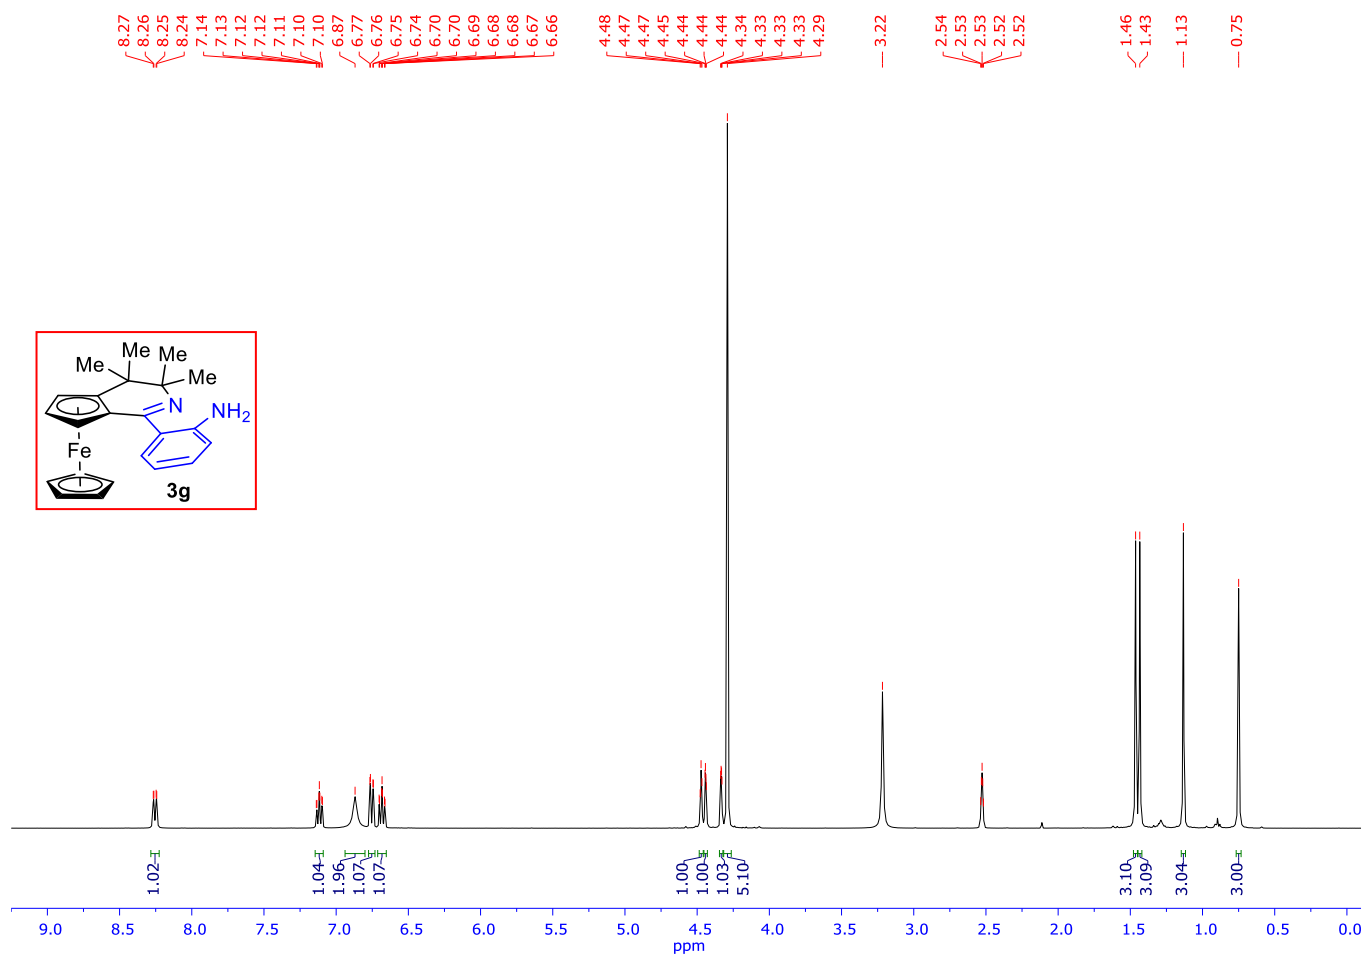

**Figure S18.** <sup>1</sup>H NMR spectrum (400 MHz, DMSO-*d*<sub>6</sub>) of compound **3g**.

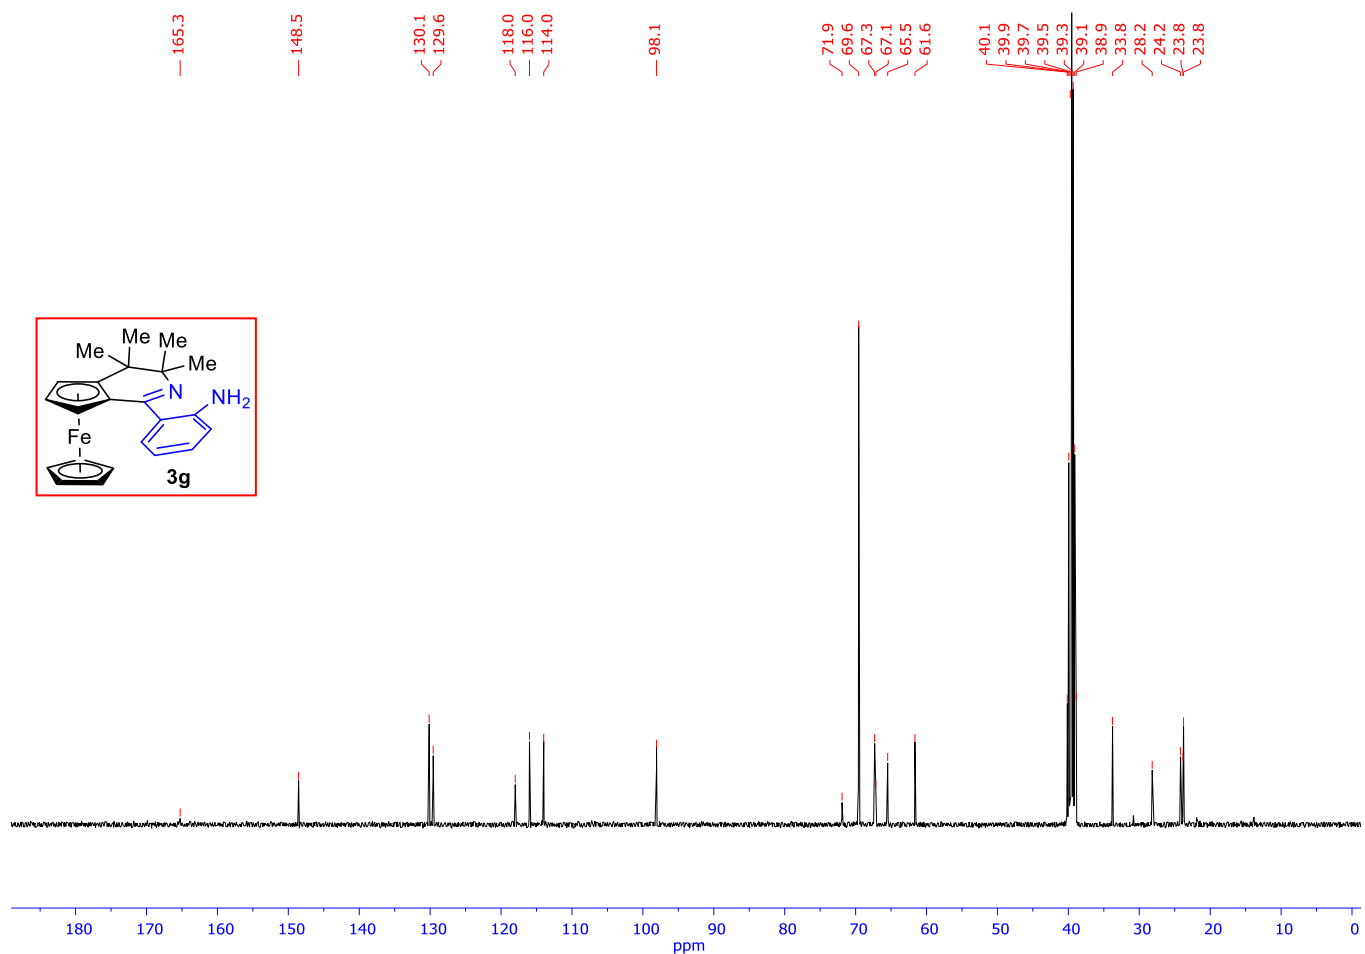

**Figure S19.** <sup>13</sup>C NMR spectrum (100 MHz, DMSO-*d*<sub>6</sub>) of compound **3g**.

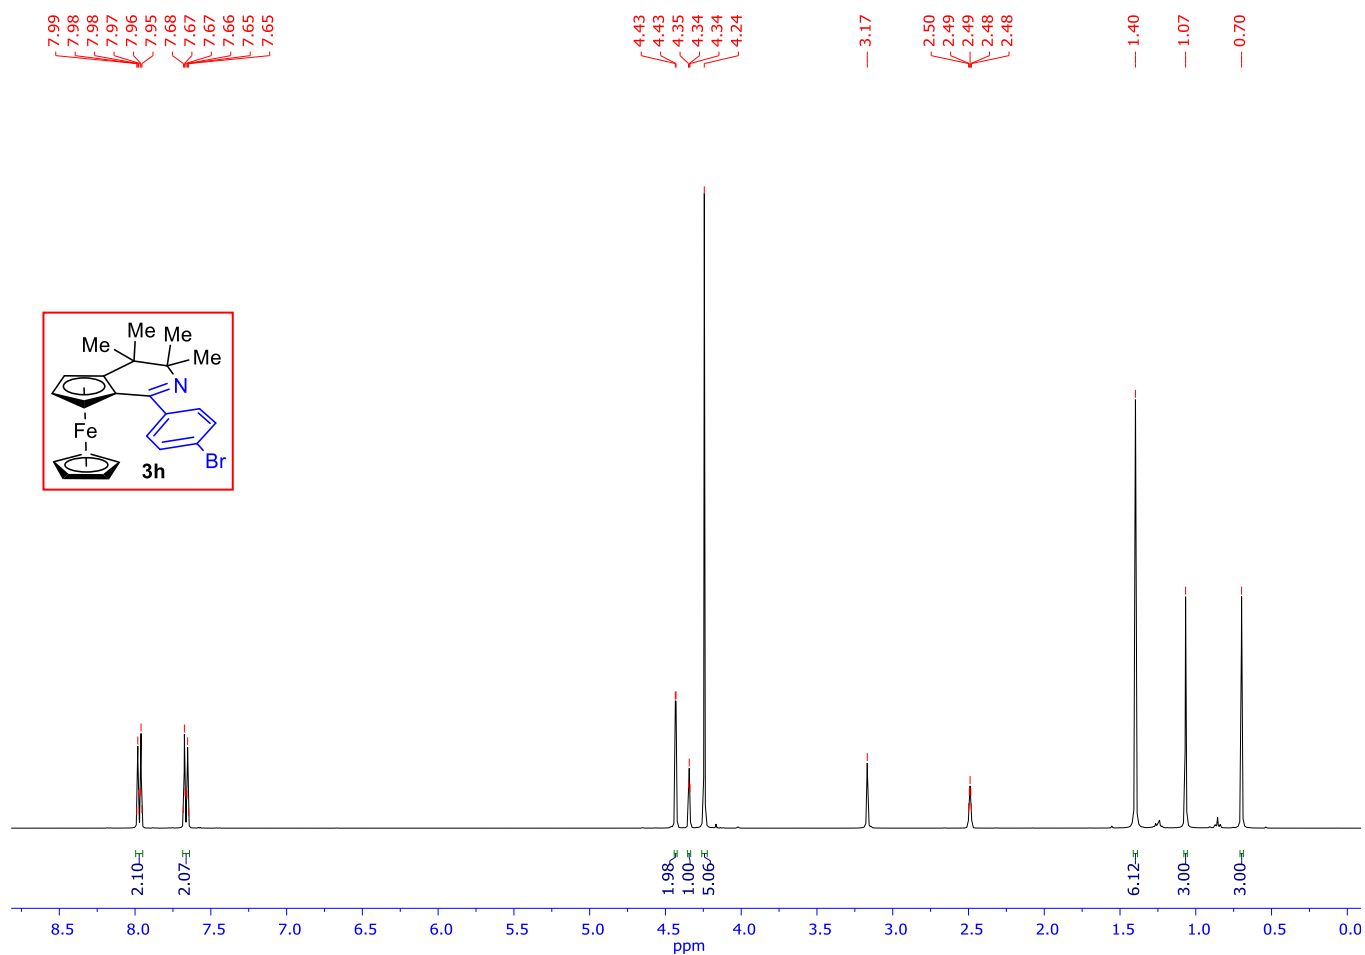

**Figure S20.** <sup>1</sup>H NMR spectrum (400 MHz, DMSO-*d*<sub>6</sub>) of compound **3h**.

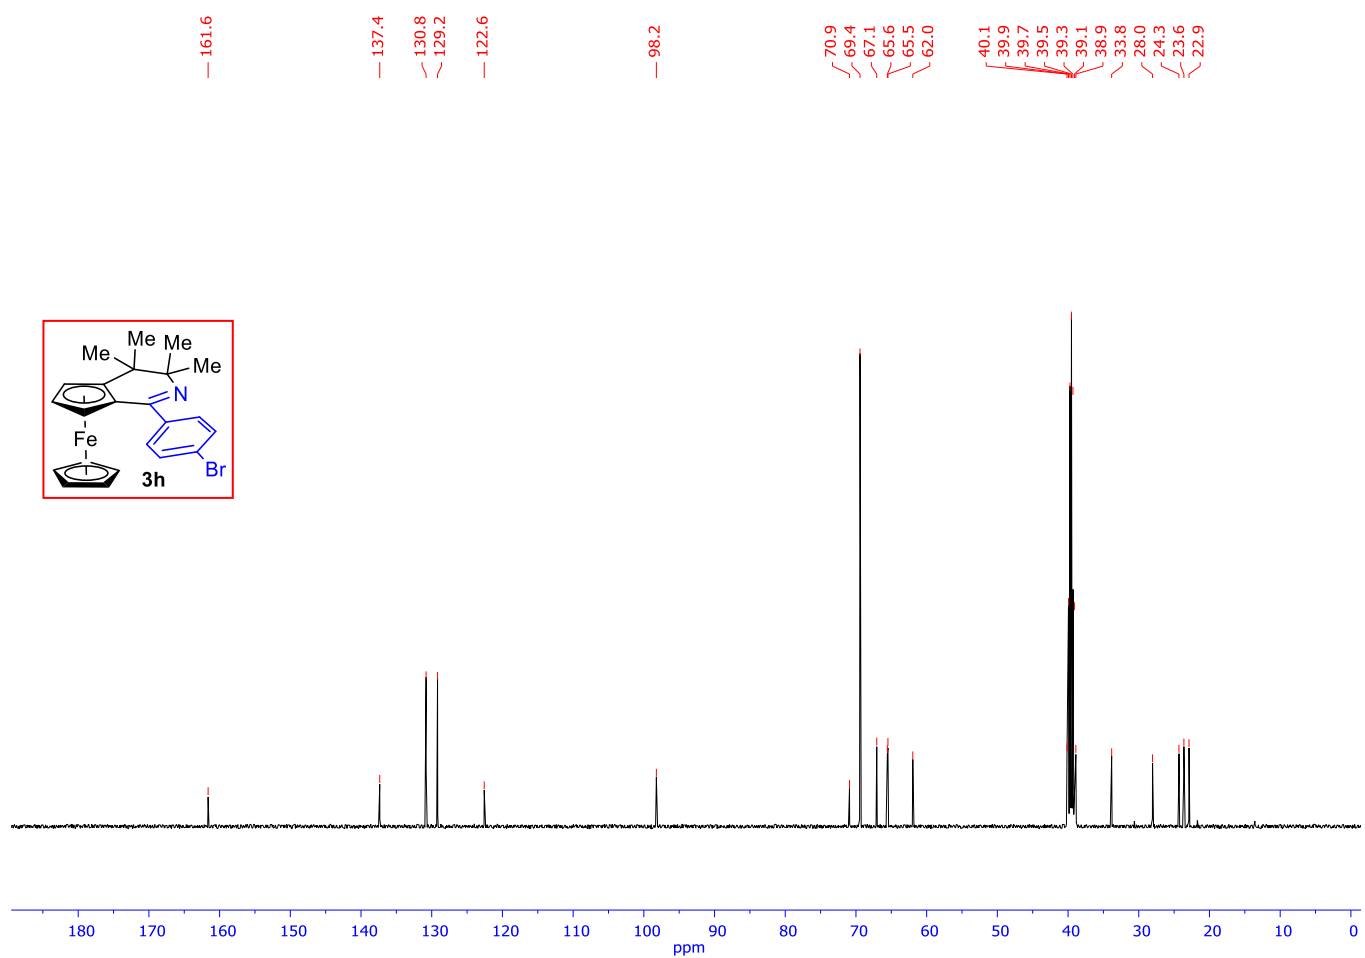

**Figure S21.** <sup>13</sup>C NMR spectrum (100 MHz, DMSO-*d*<sub>6</sub>) of compound **3h**.

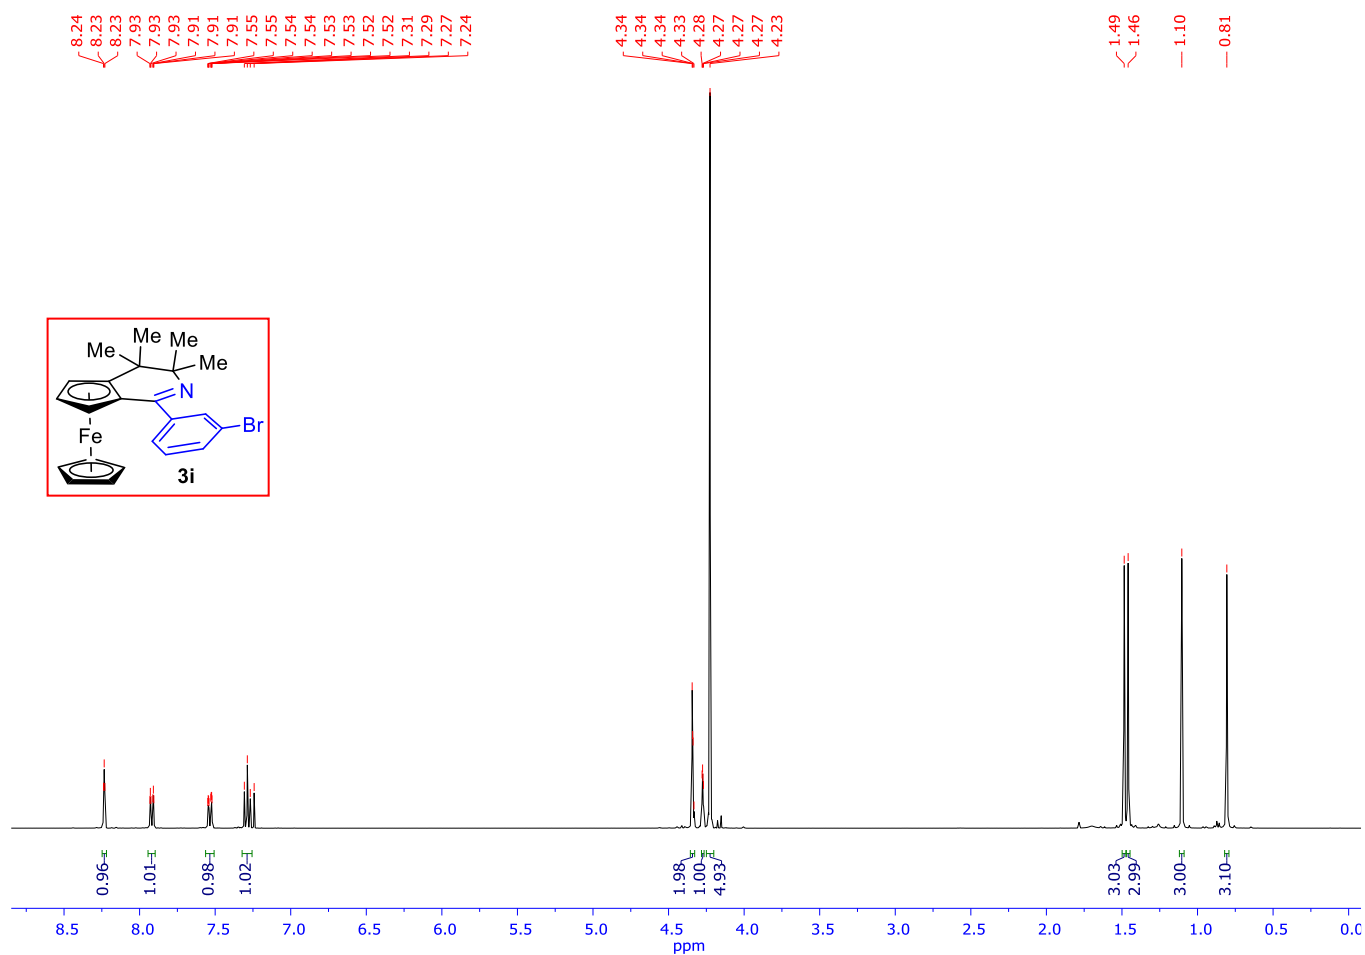

**Figure S22.** <sup>1</sup>H NMR spectrum (400 MHz, CDCl<sub>3</sub>) of compound **3i**.

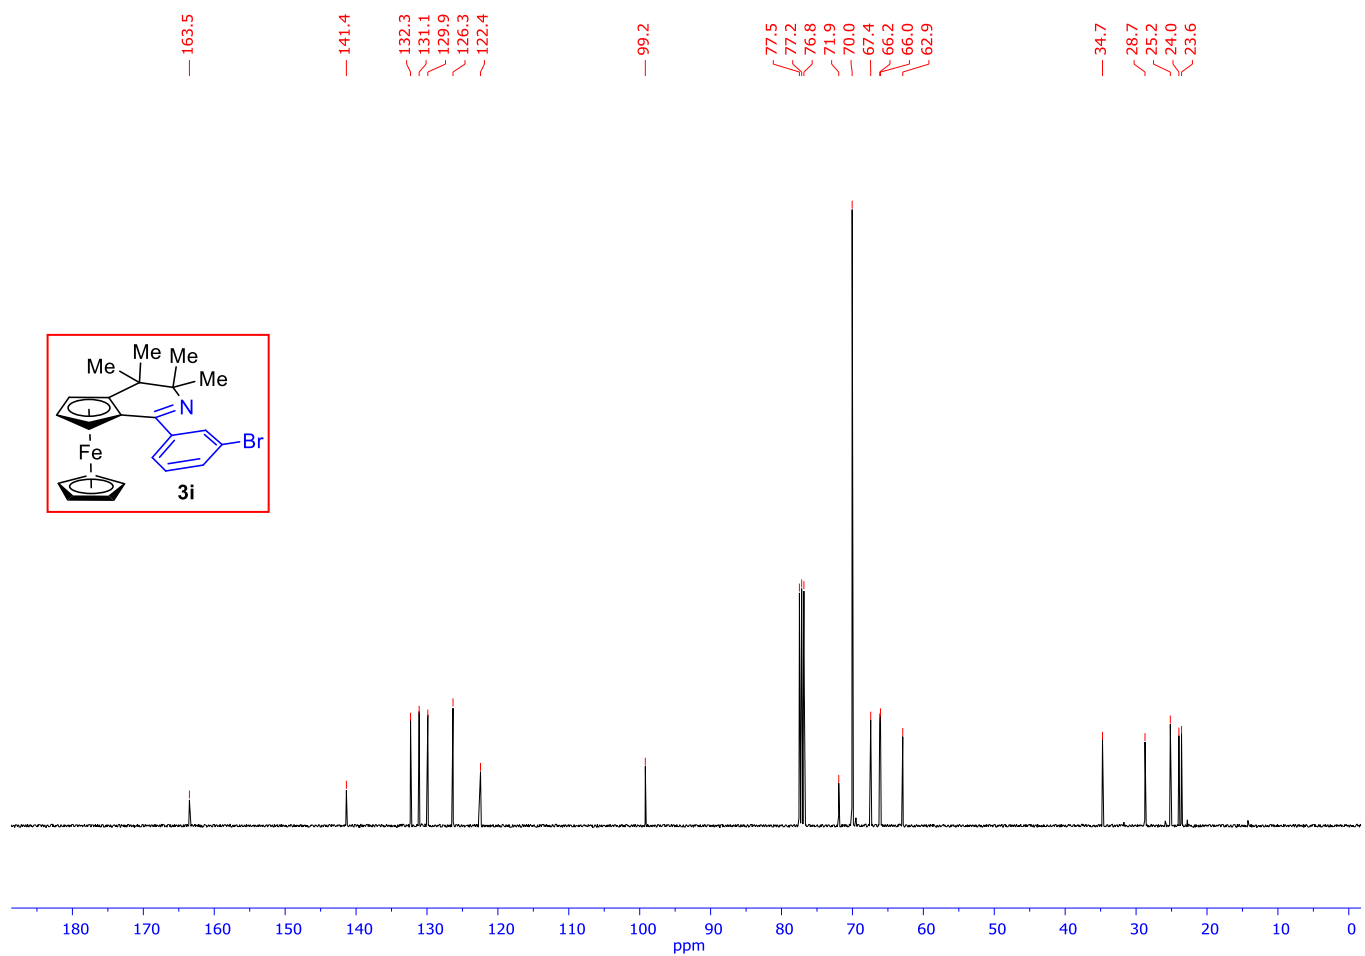

**Figure S23.** <sup>13</sup>C NMR spectrum (100 MHz, CDCl<sub>3</sub>) of compound **3i**.

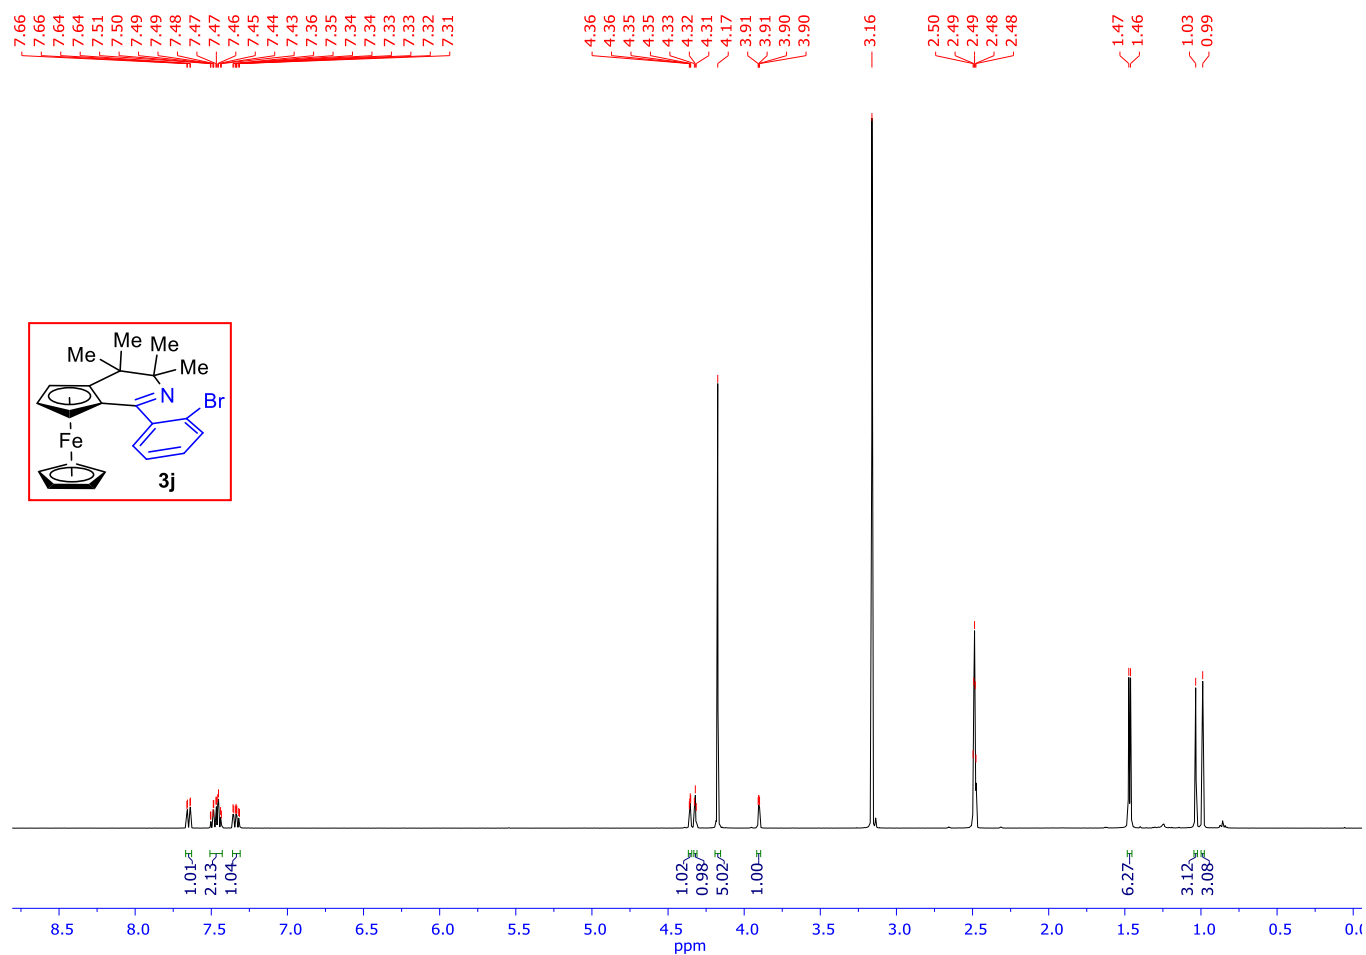

**Figure S24.** <sup>1</sup>H NMR spectrum (400 MHz, DMSO-*d*<sub>6</sub>) of compound **3j**.

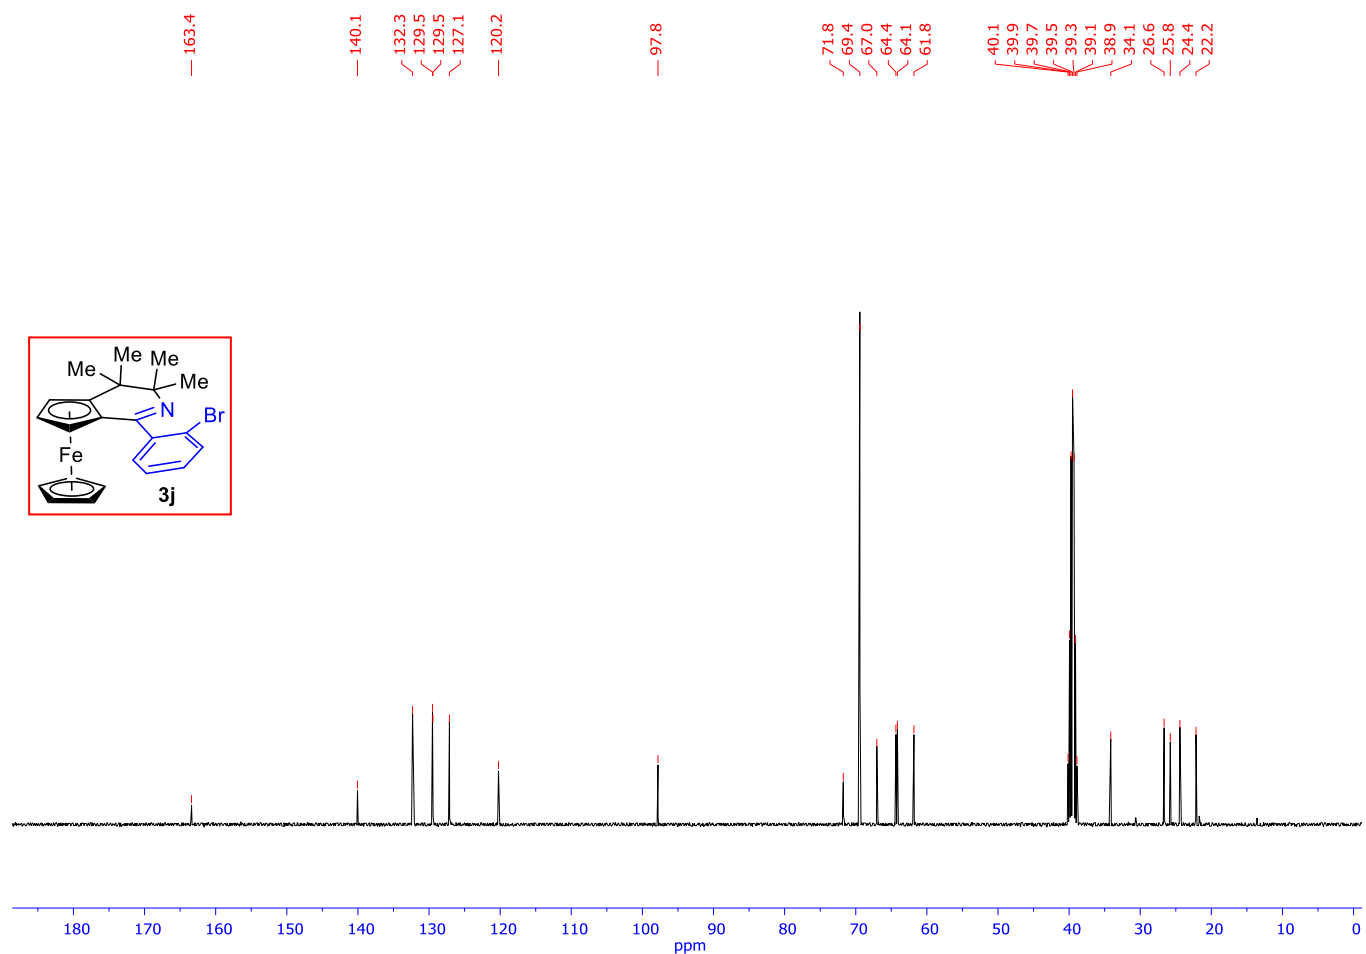

**Figure S25.** <sup>13</sup>C NMR spectrum (100 MHz, DMSO-*d*<sub>6</sub>) of compound **3j**.

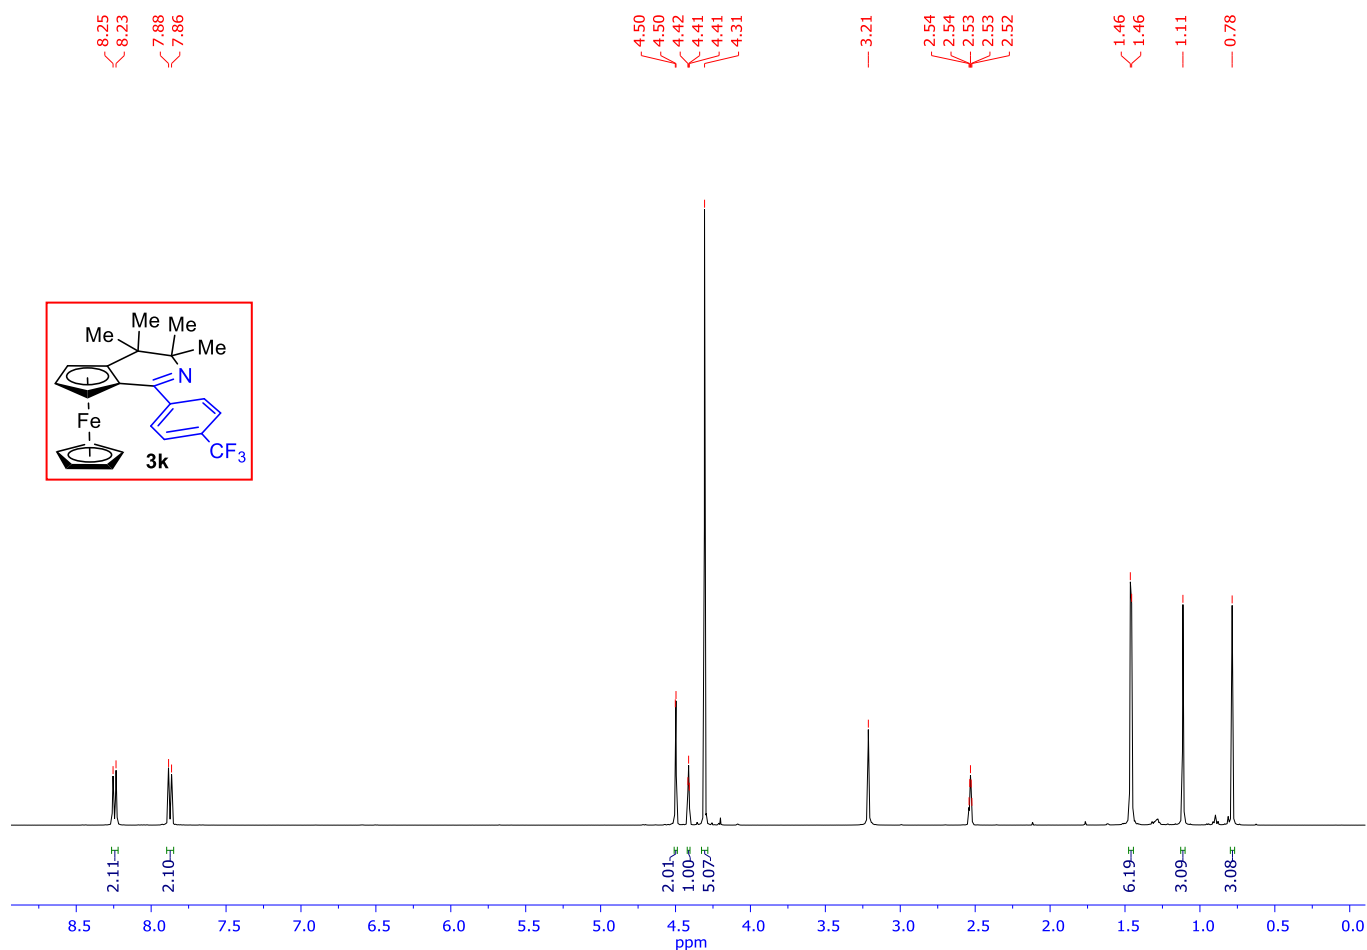

**Figure S26.** <sup>1</sup>H NMR spectrum (400 MHz, DMSO-*d*<sub>6</sub>) of compound **3k**.

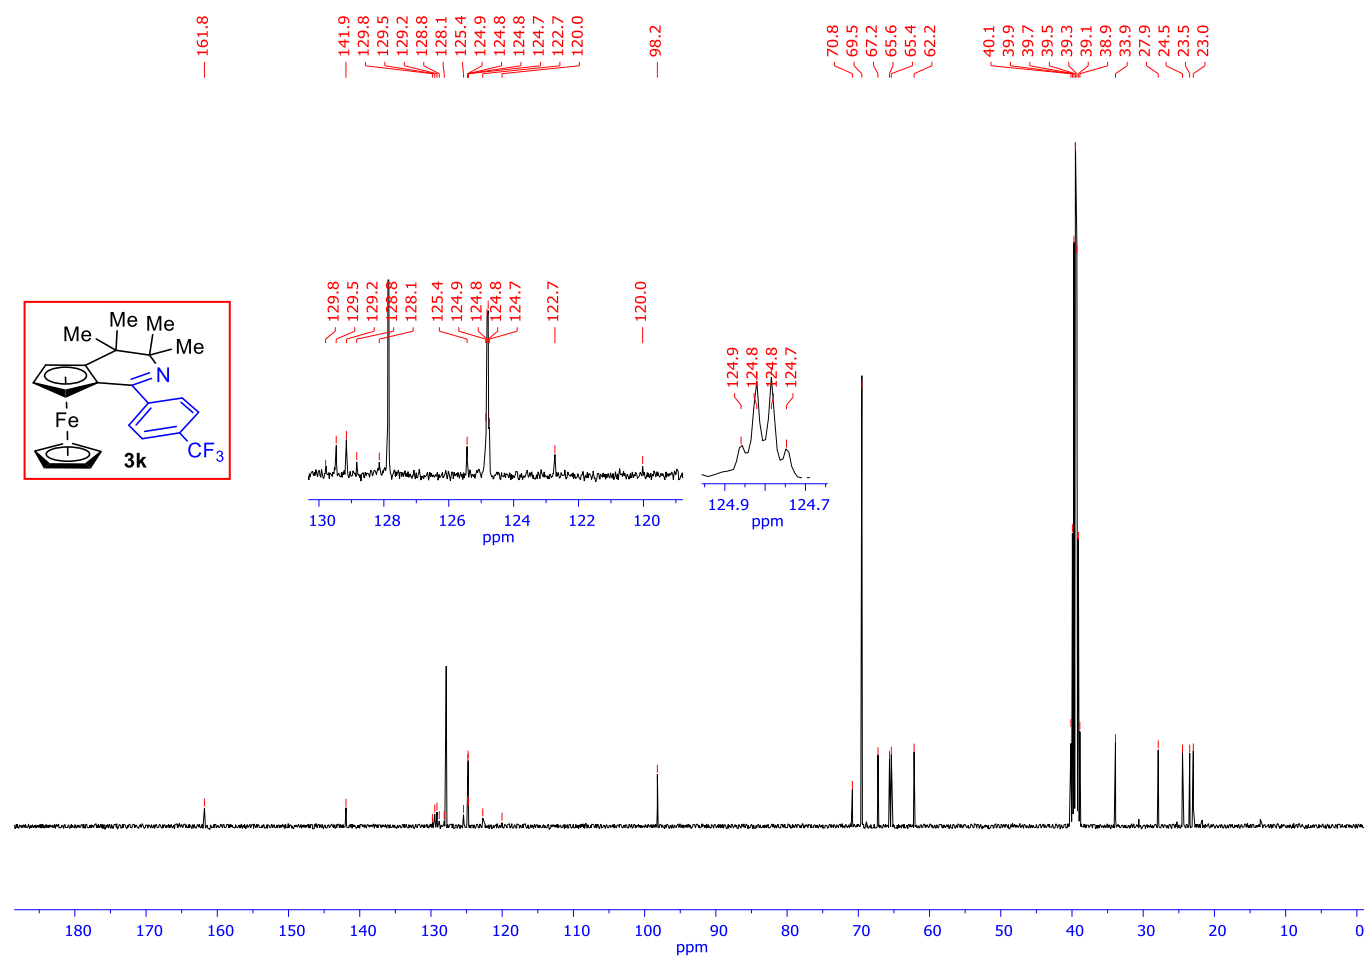

**Figure S27.** <sup>13</sup>C NMR spectrum (100 MHz, DMSO-*d*<sub>6</sub>) of compound **3k**.

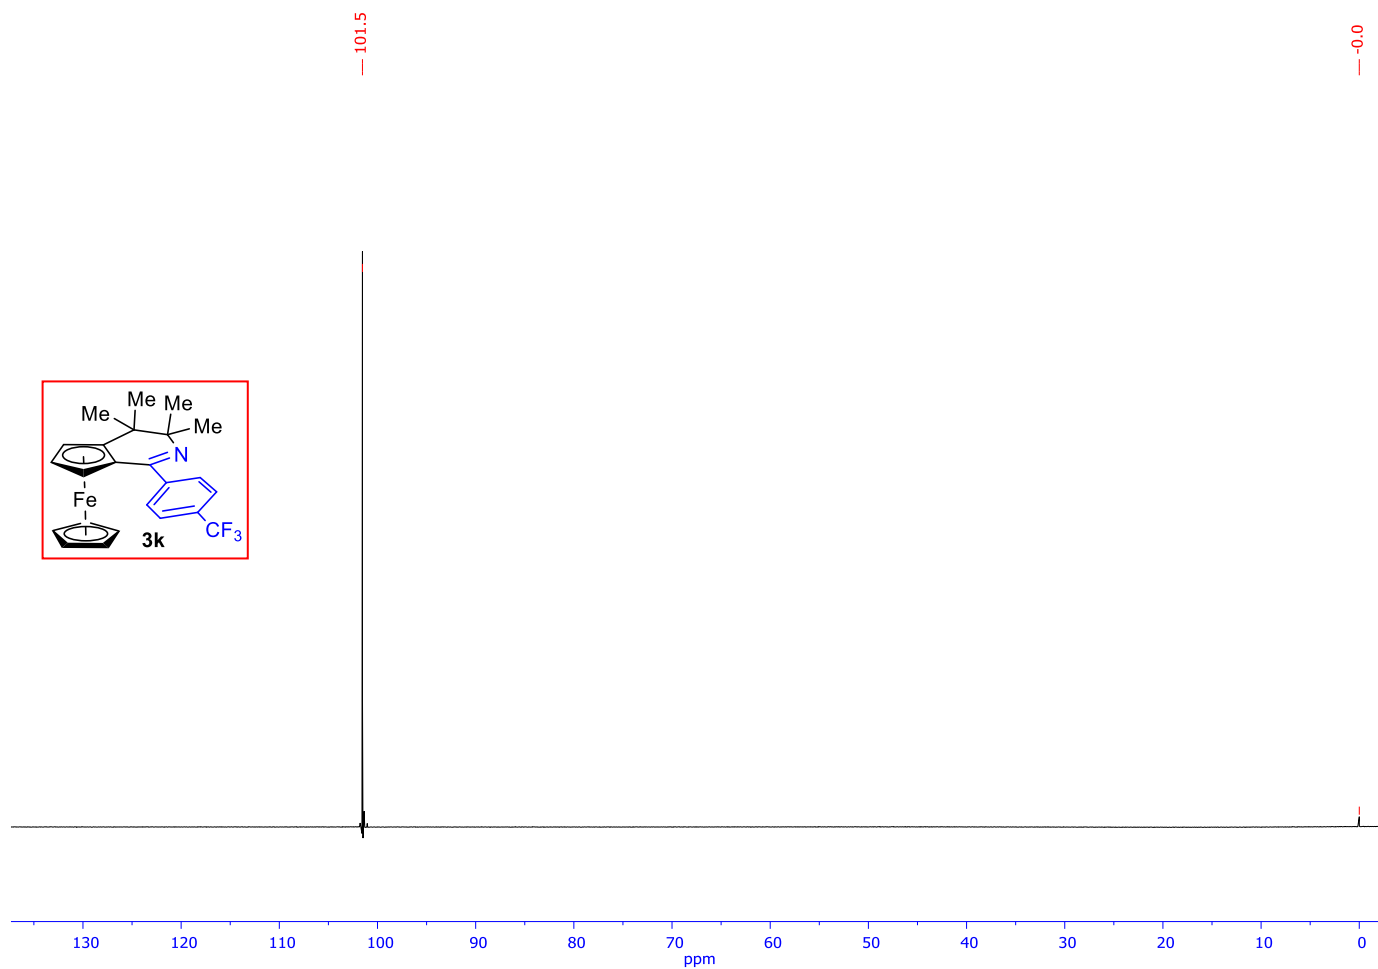

**Figure S28.** <sup>19</sup>F NMR spectrum (377 MHz, CDCl<sub>3</sub>) of **3k**.

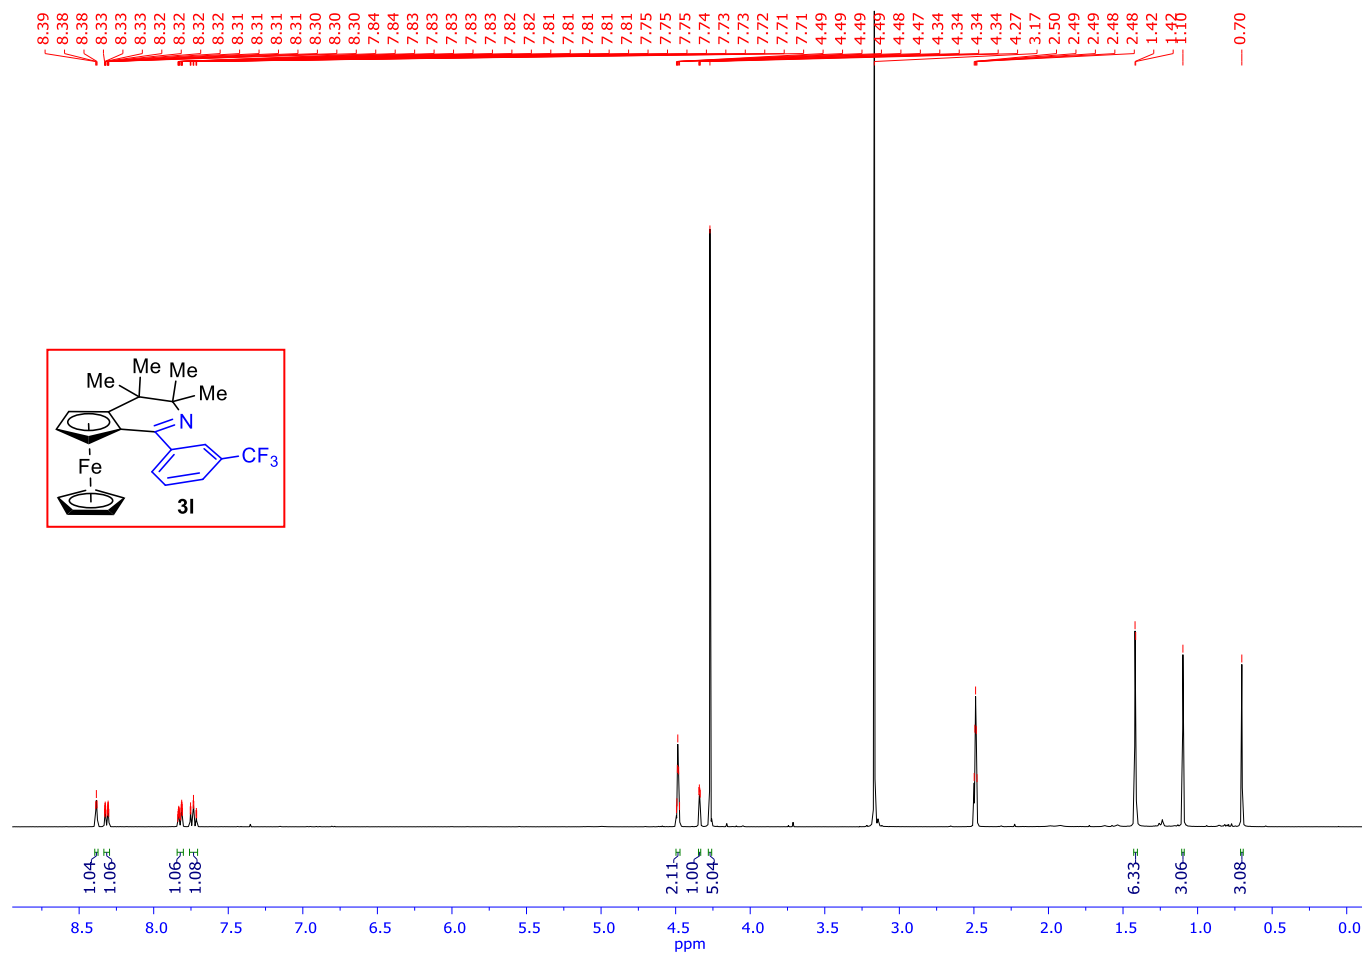

**Figure S29.** <sup>1</sup>H NMR spectrum (400 MHz, DMSO-*d*<sub>6</sub>) of compound **3l**.

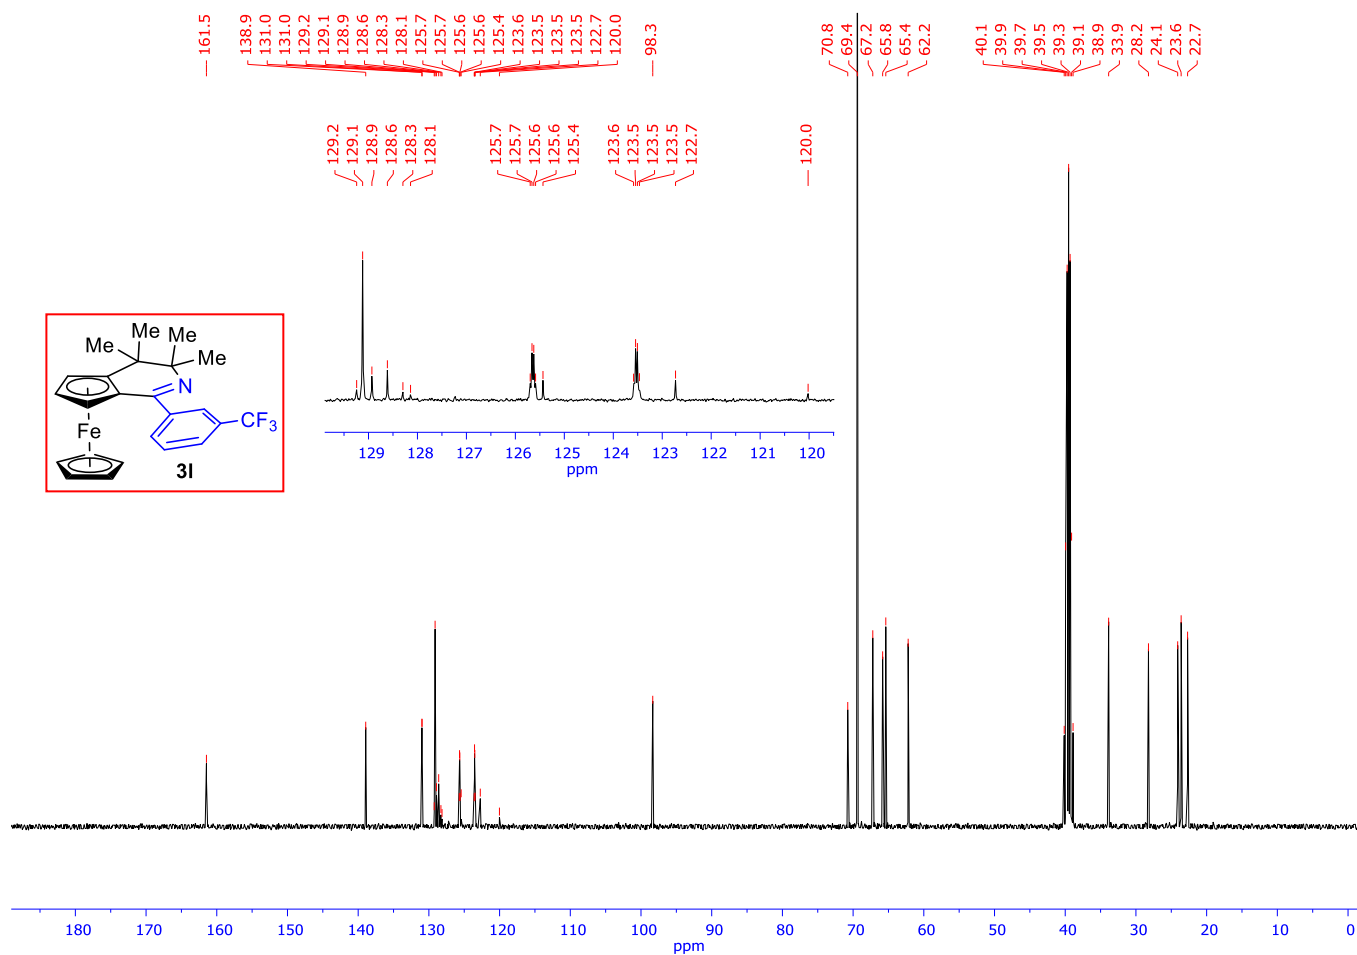

**Figure S30.** <sup>13</sup>C NMR spectrum (100 MHz, DMSO-*d*<sub>6</sub>) of compound **3l**.

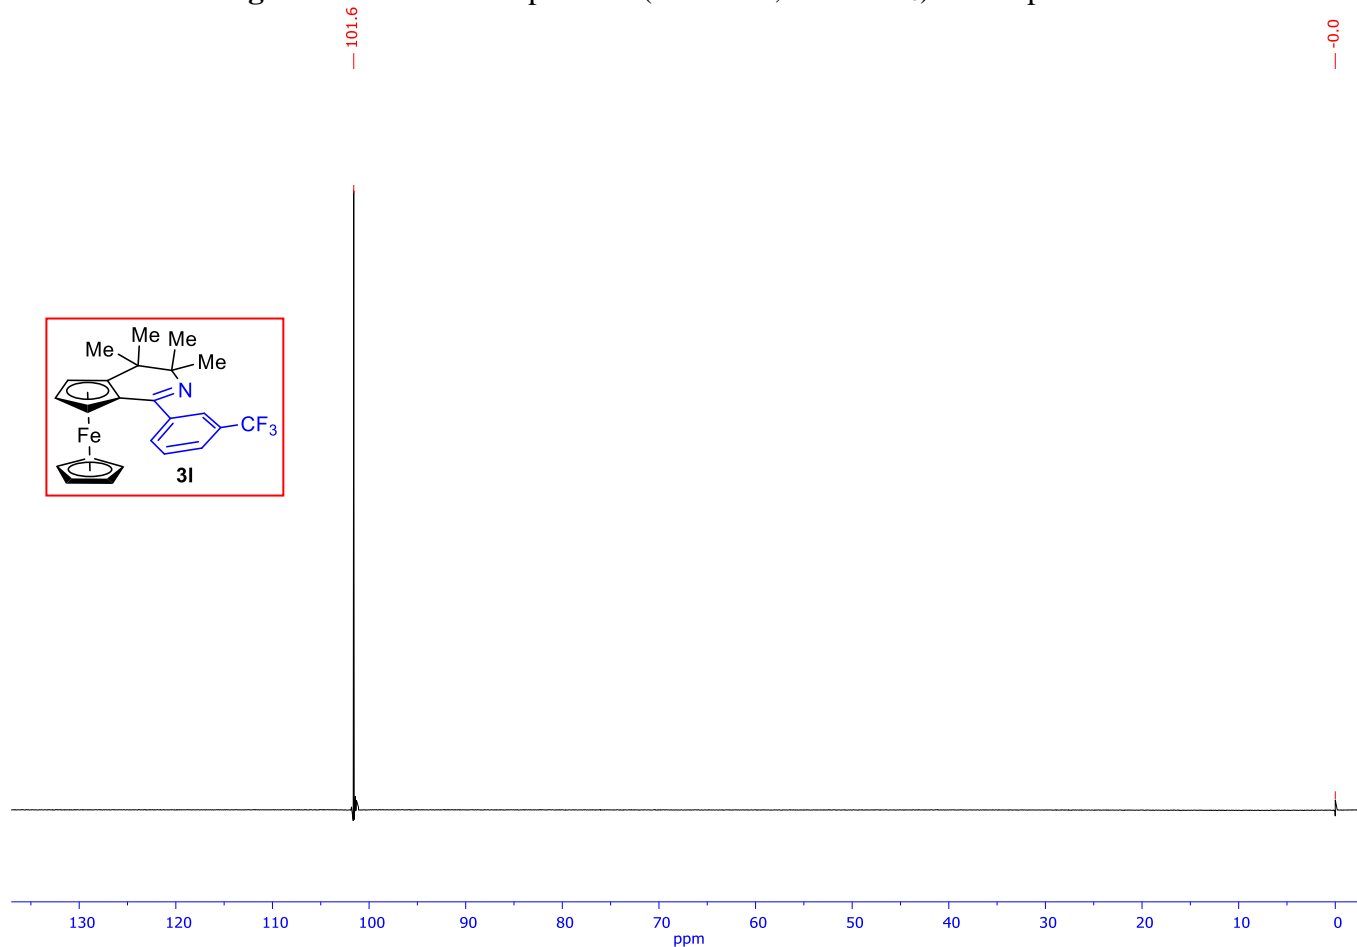

**Figure S31.** <sup>19</sup>F NMR spectrum (377 MHz, CDCl<sub>3</sub>) of **3k**.

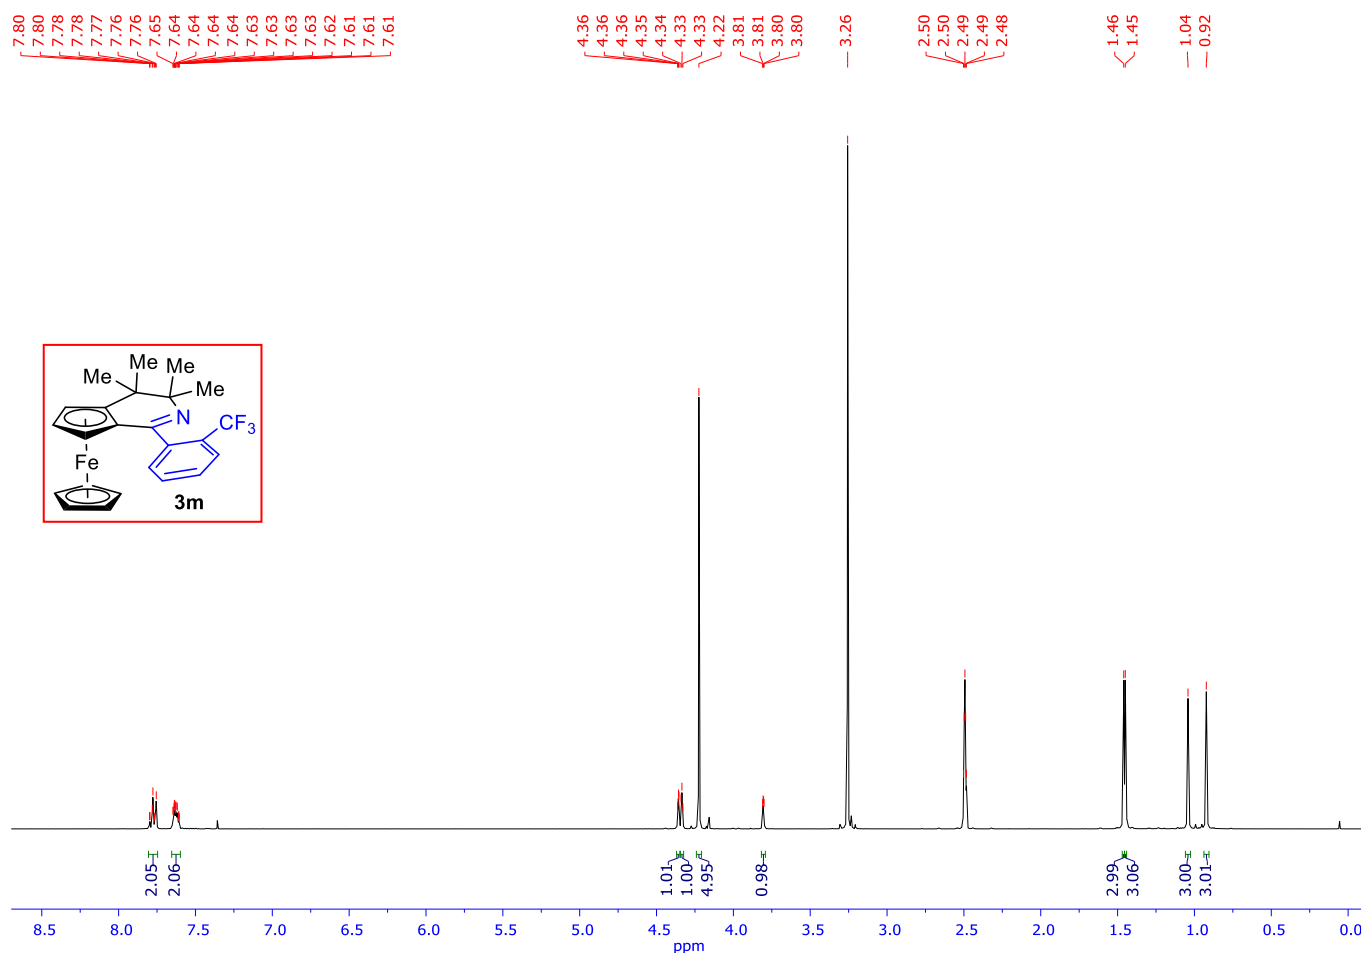

**Figure S32.** <sup>1</sup>H NMR spectrum (400 MHz, DMSO-*d*<sub>6</sub>) of compound **3m**.

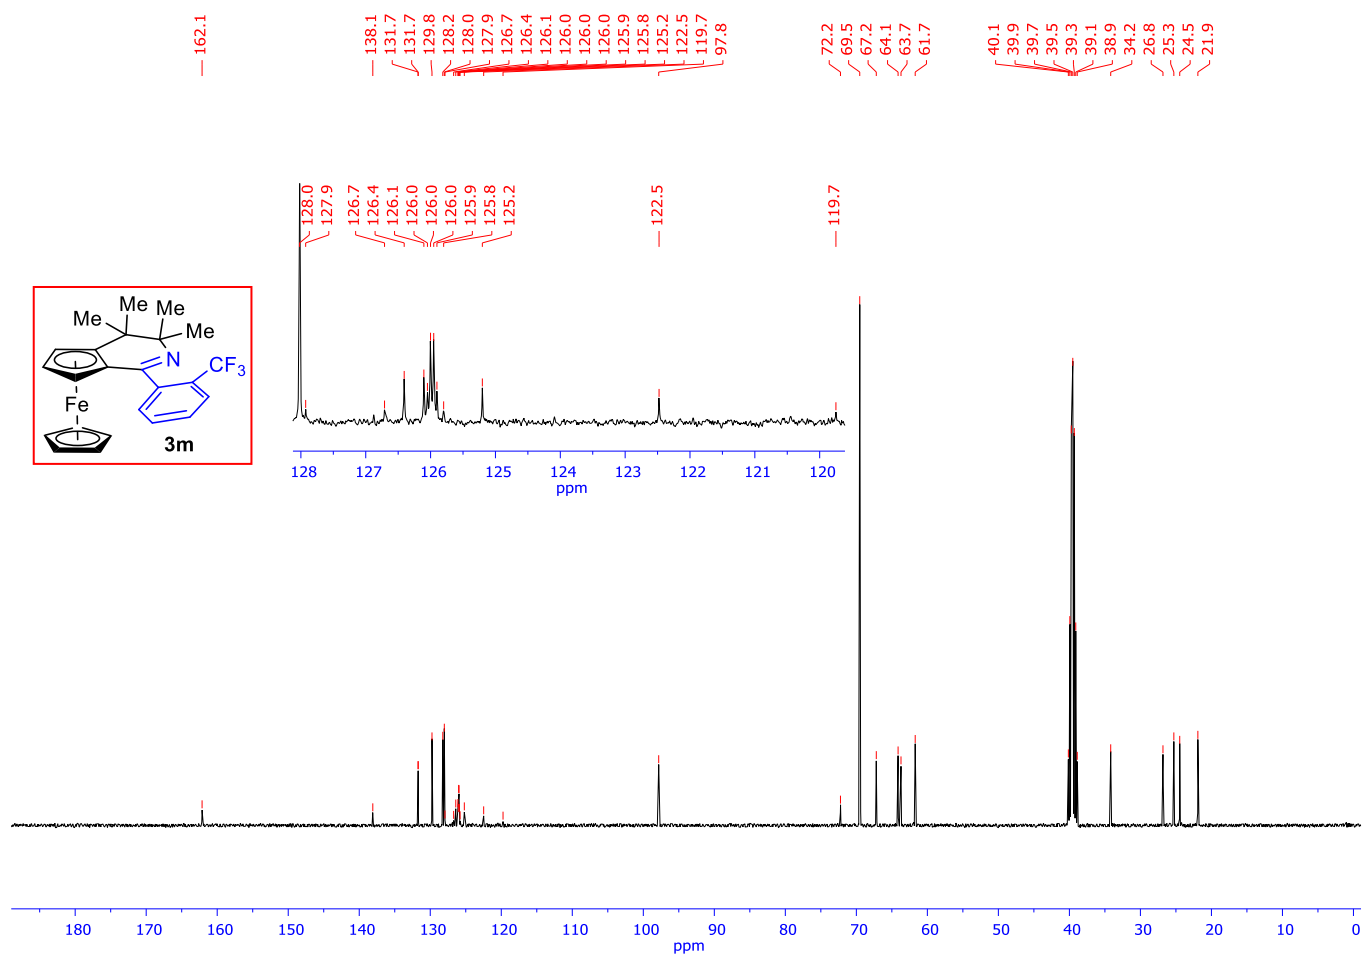

**Figure S33.** <sup>13</sup>C NMR spectrum (100 MHz, DMSO-*d*<sub>6</sub>) of compound **3m**.



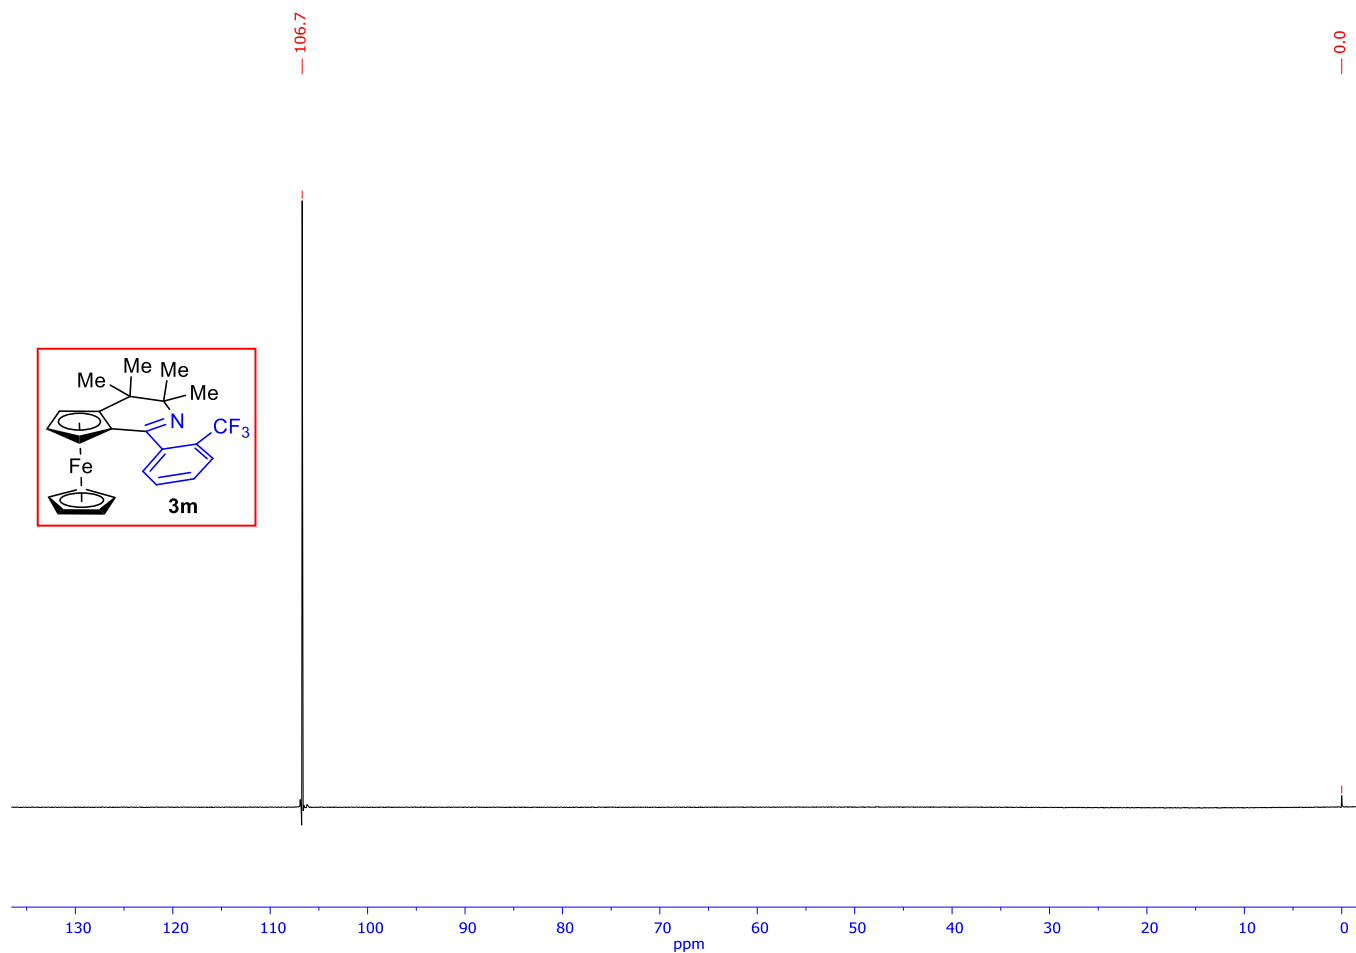

**Figure S34.**  $^{19}\text{F}$  NMR spectrum (377 MHz,  $\text{CDCl}_3$ ) of **3m**.

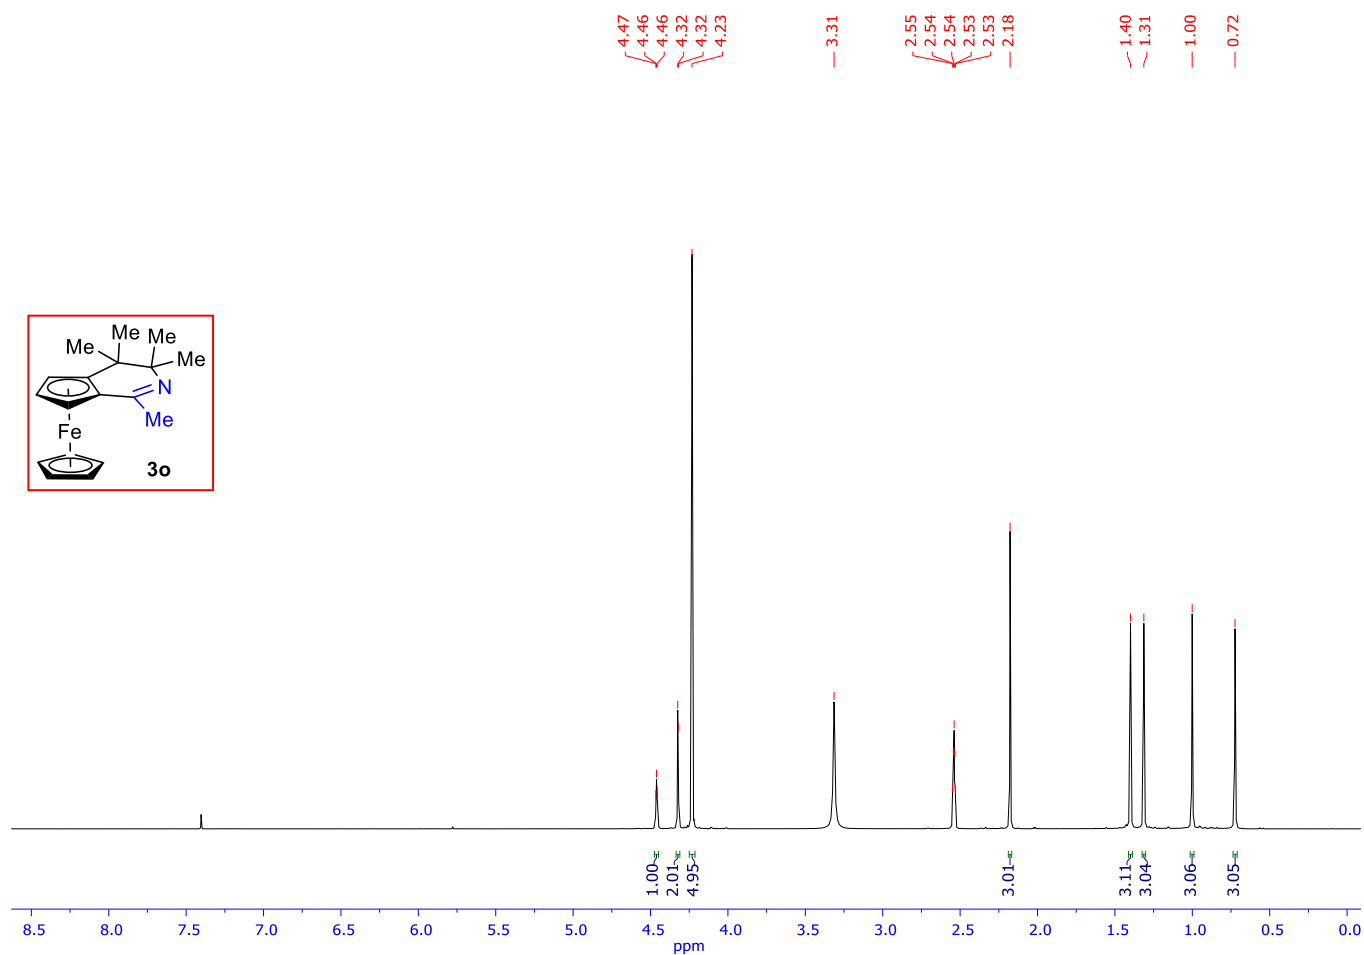

**Figure S35.** <sup>1</sup>H NMR spectrum (400 MHz, DMSO-*d*<sub>6</sub>) of compound **3o**.

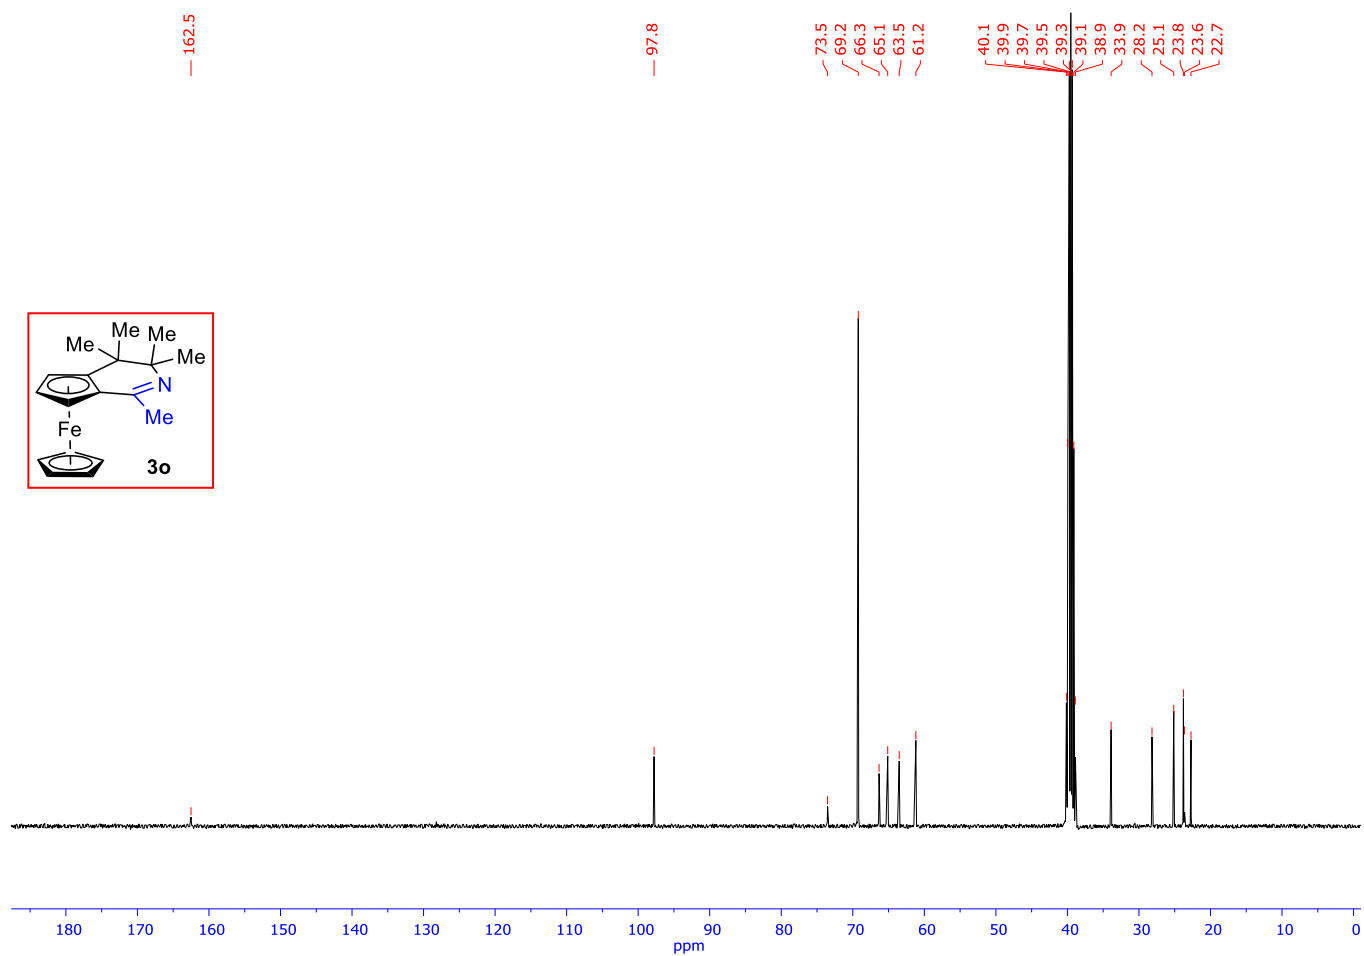

**Figure S36.** <sup>13</sup>C NMR spectrum (100 MHz, DMSO-*d*<sub>6</sub>) of compound **3o**.

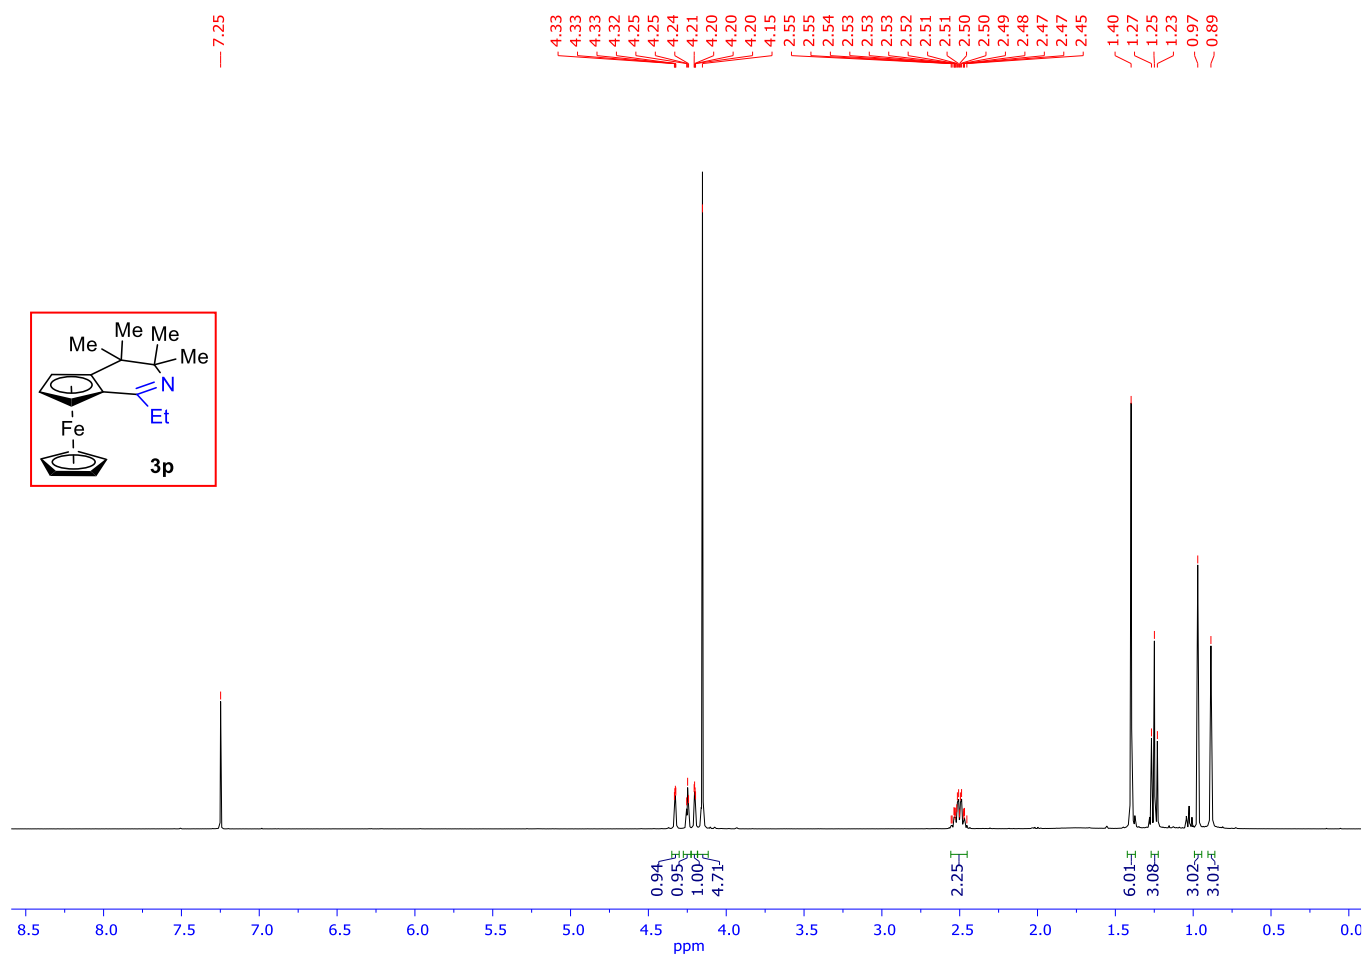

**Figure S37.** <sup>1</sup>H NMR spectrum (400 MHz, CDCl<sub>3</sub>) of compound **3p**.

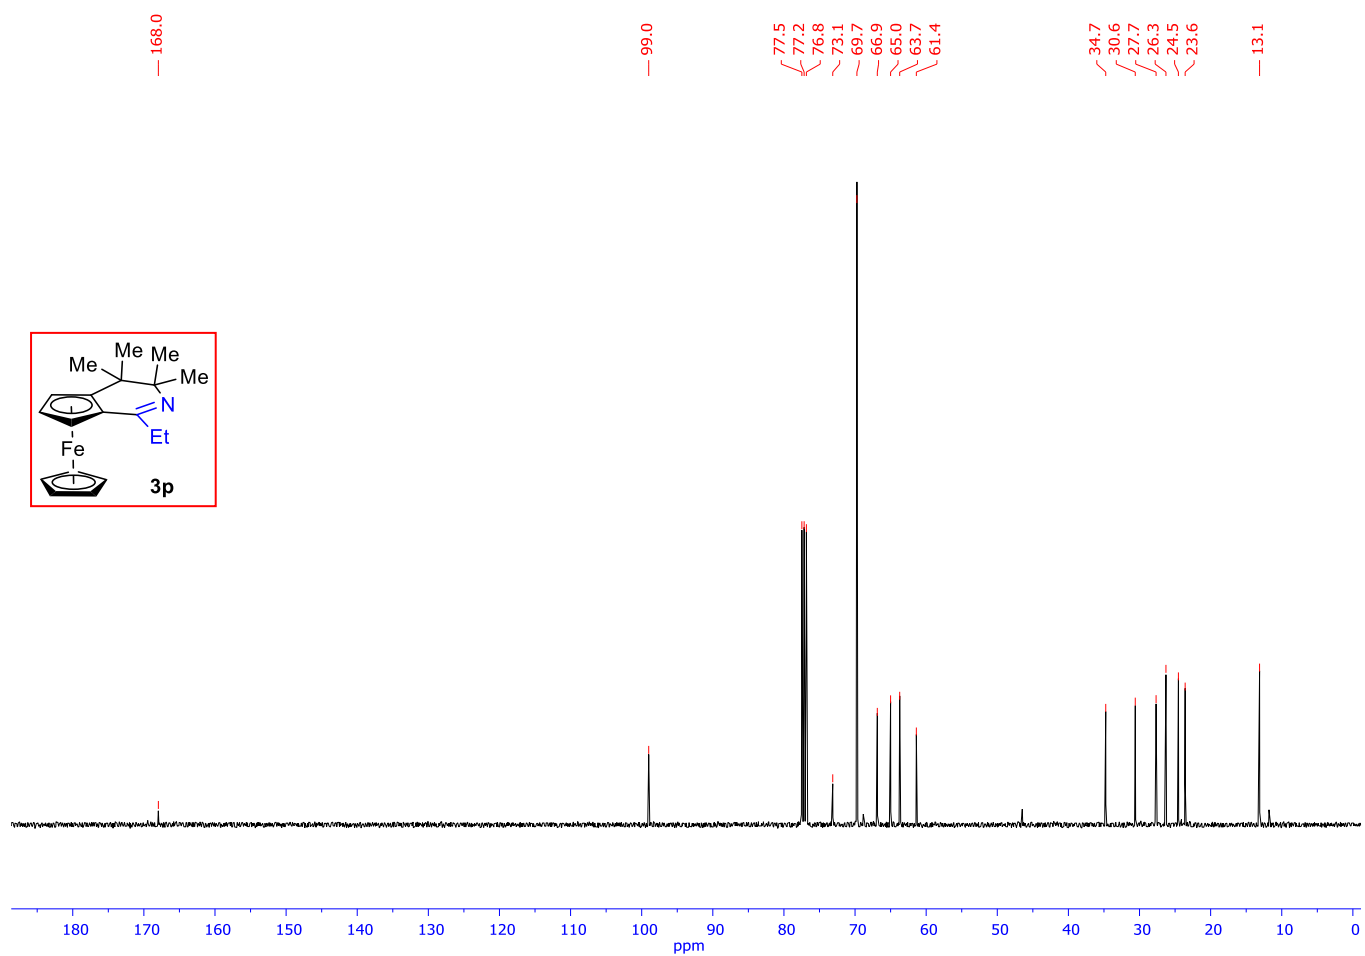

**Figure S38.** <sup>13</sup>C NMR spectrum (100 MHz, CDCl<sub>3</sub>) of compound **3p**.

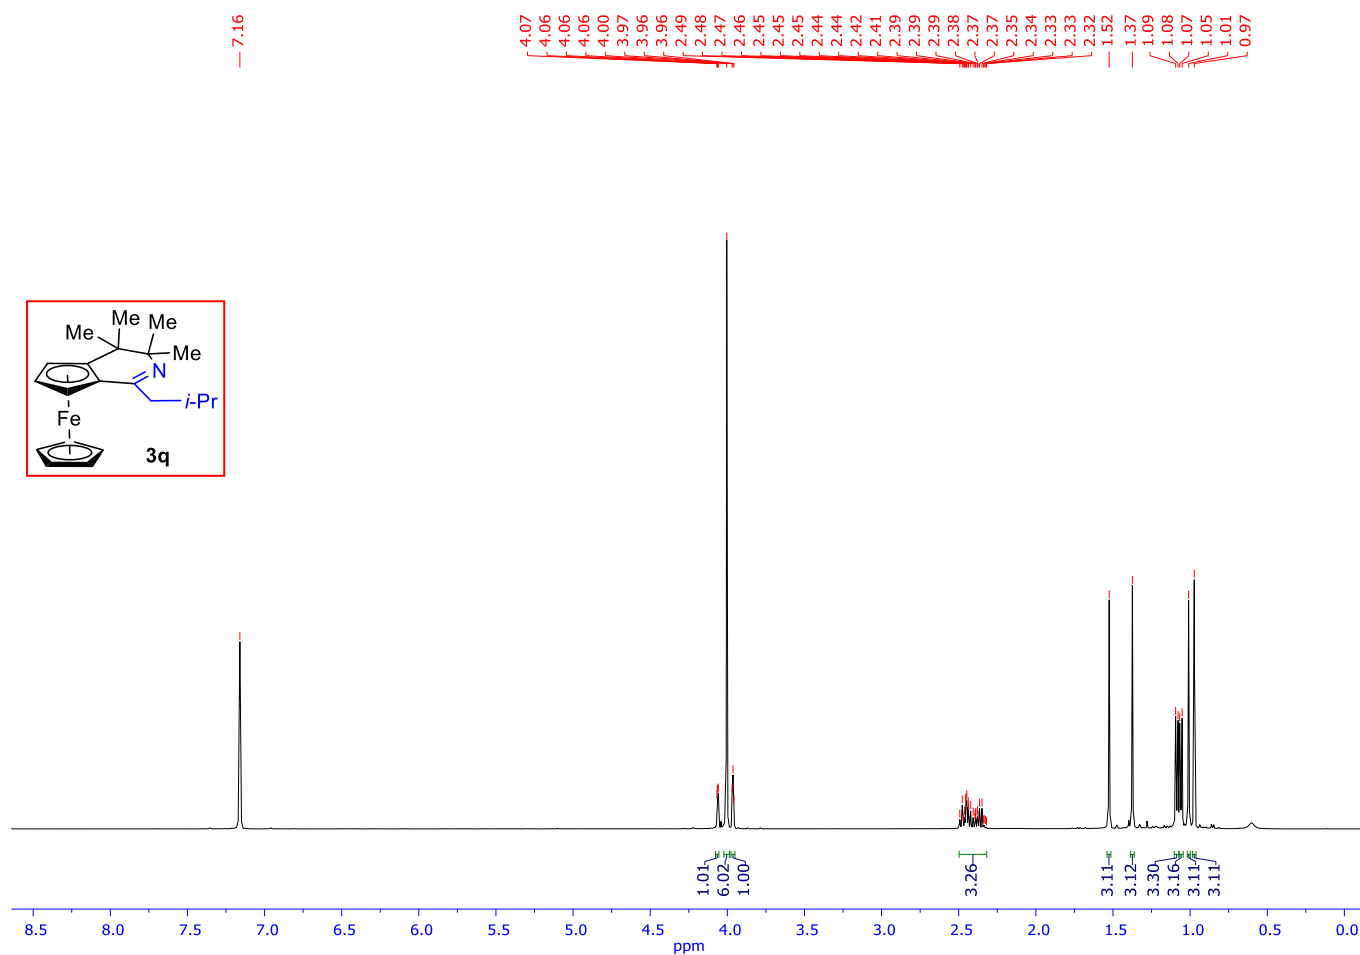

**Figure S39.** <sup>1</sup>H NMR spectrum (400 MHz, C<sub>6</sub>D<sub>6</sub>) of compound **3q**.

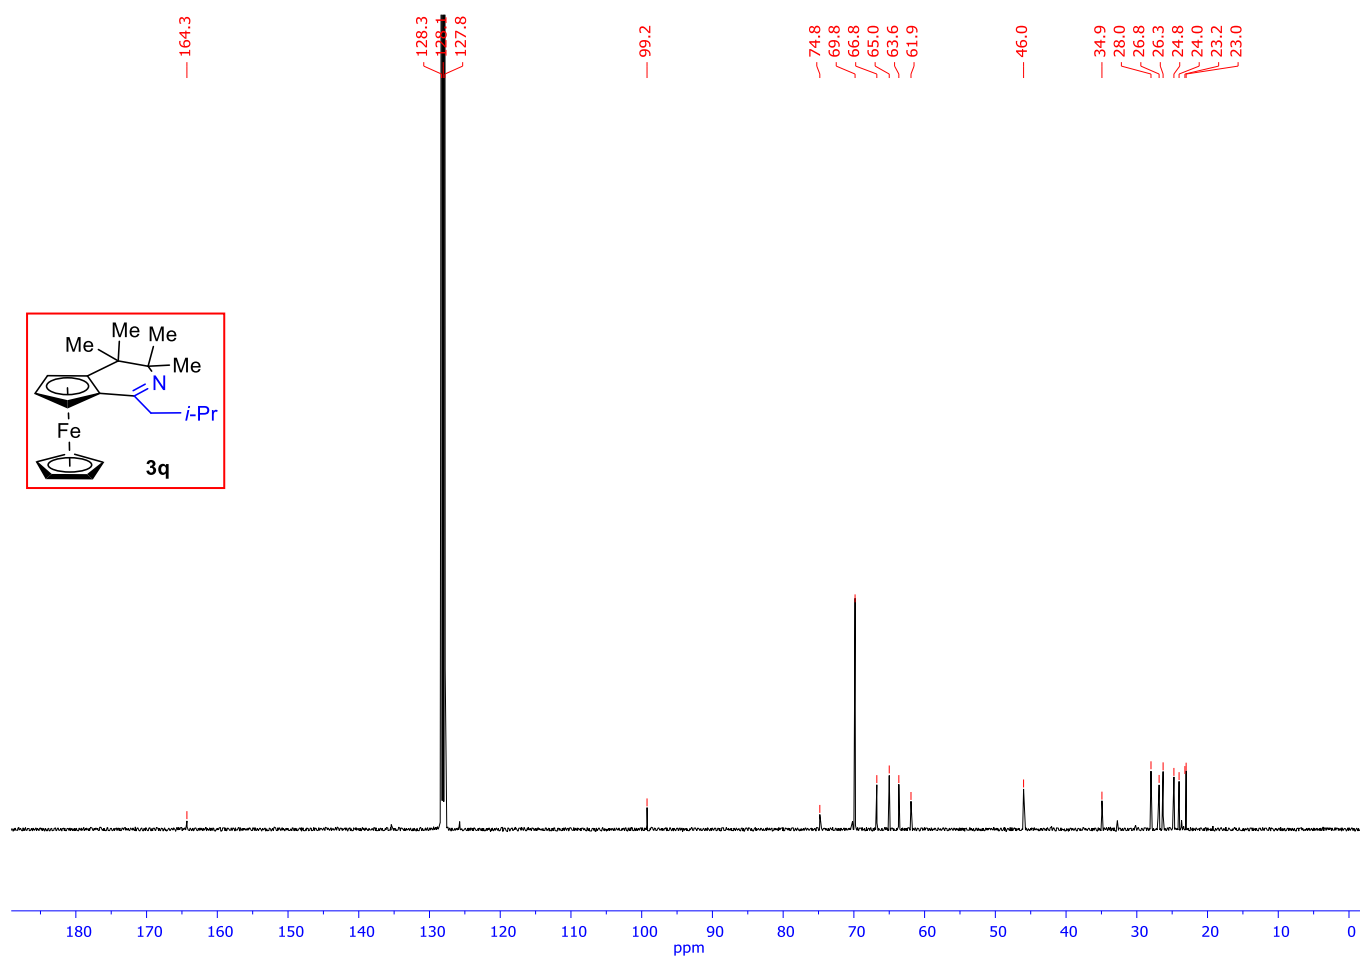

**Figure S40.** <sup>13</sup>C NMR spectrum (100 MHz, C<sub>6</sub>D<sub>6</sub>) of compound **3q**.

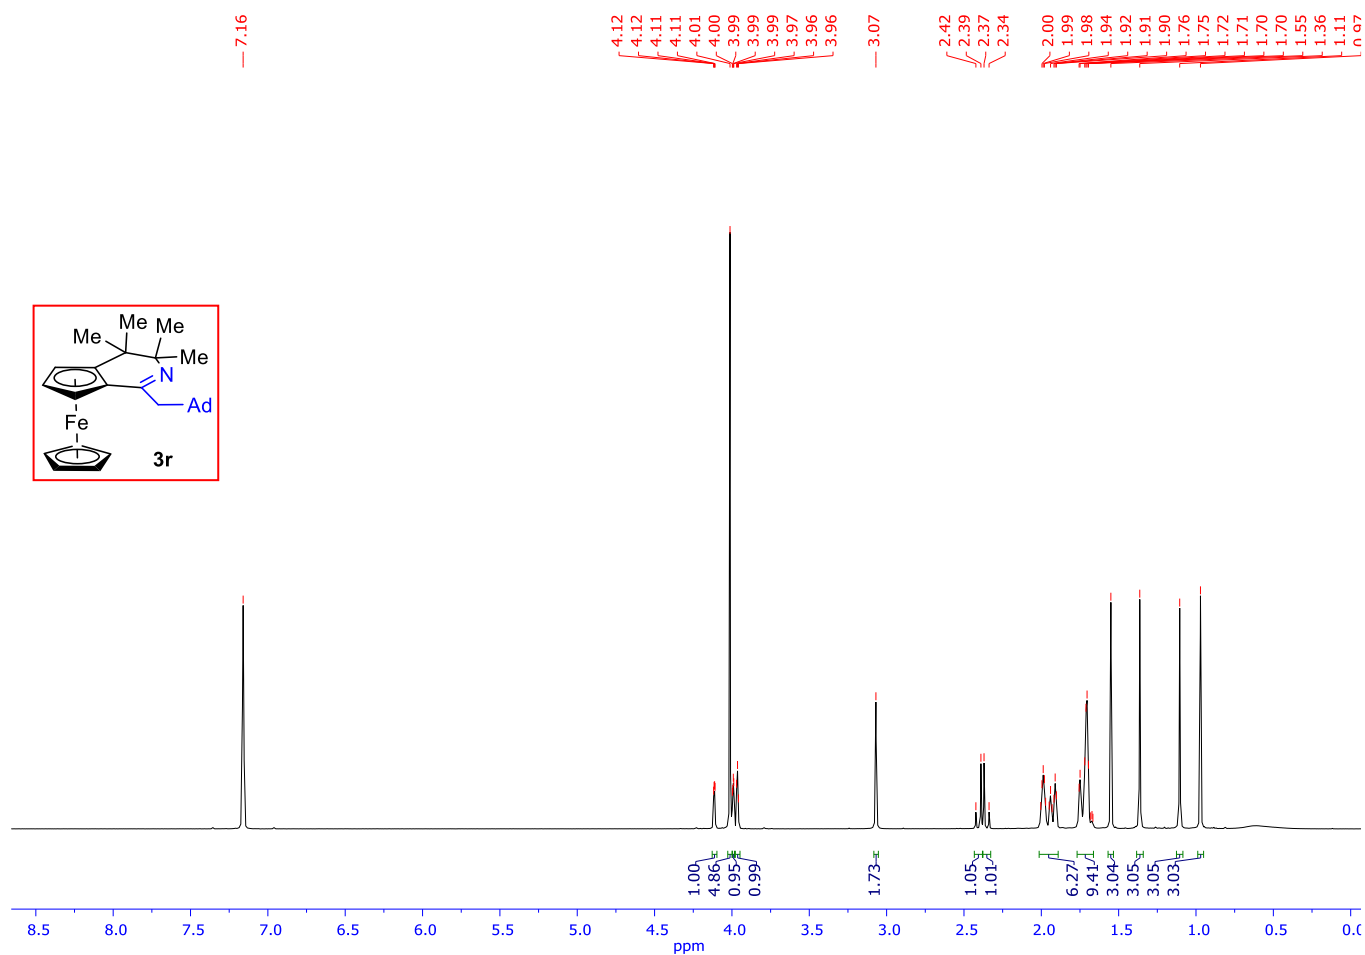

**Figure S41.** <sup>1</sup>H NMR spectrum (400 MHz, C<sub>6</sub>D<sub>6</sub>) of compound **3r**.

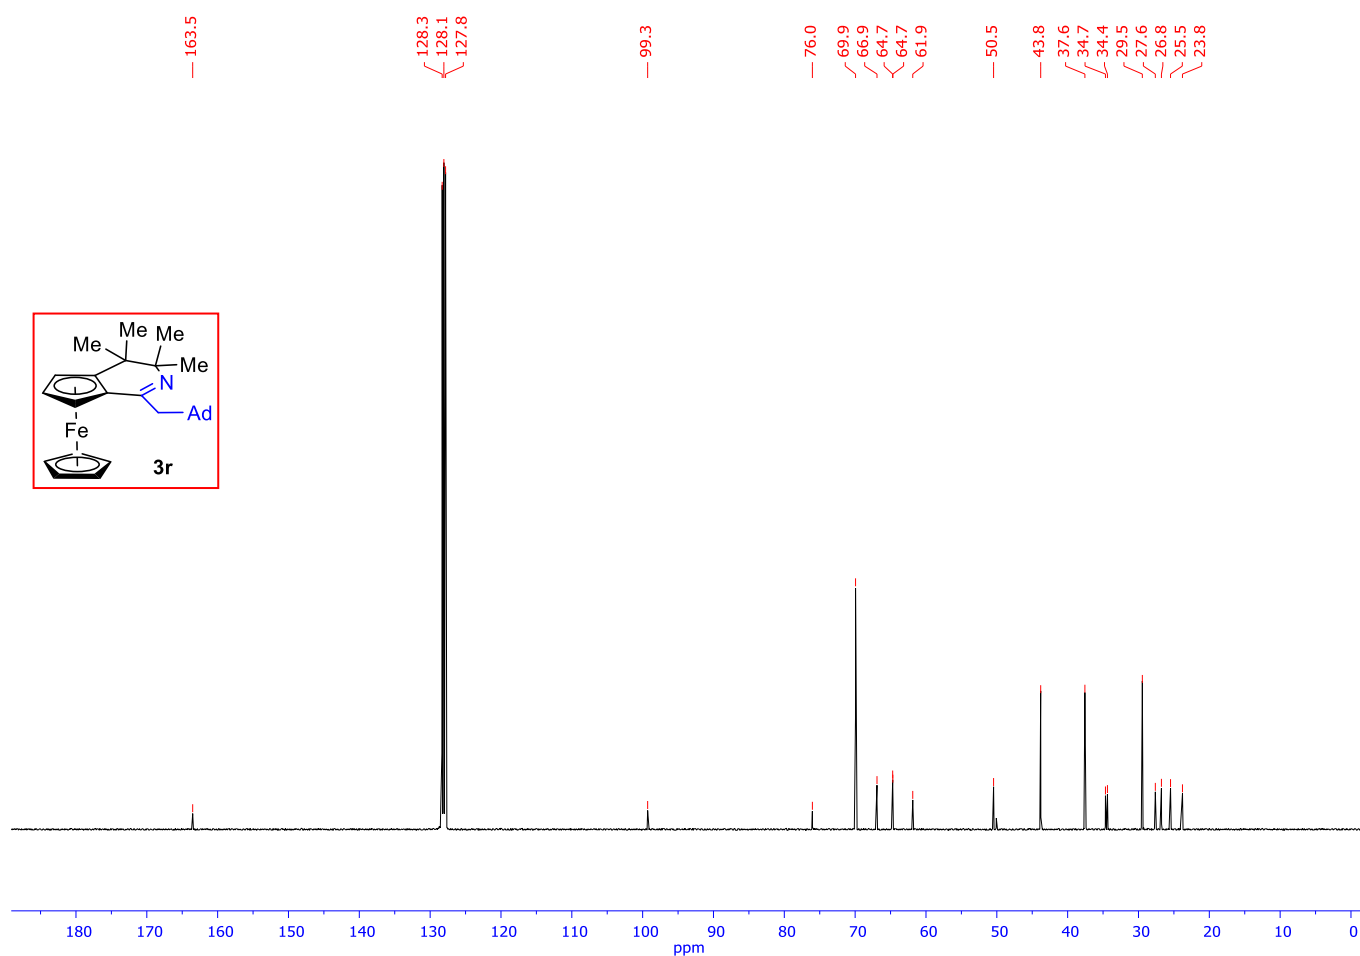

**Figure S42.** <sup>13</sup>C NMR spectrum (100 MHz, C<sub>6</sub>D<sub>6</sub>) of compound **3r**.

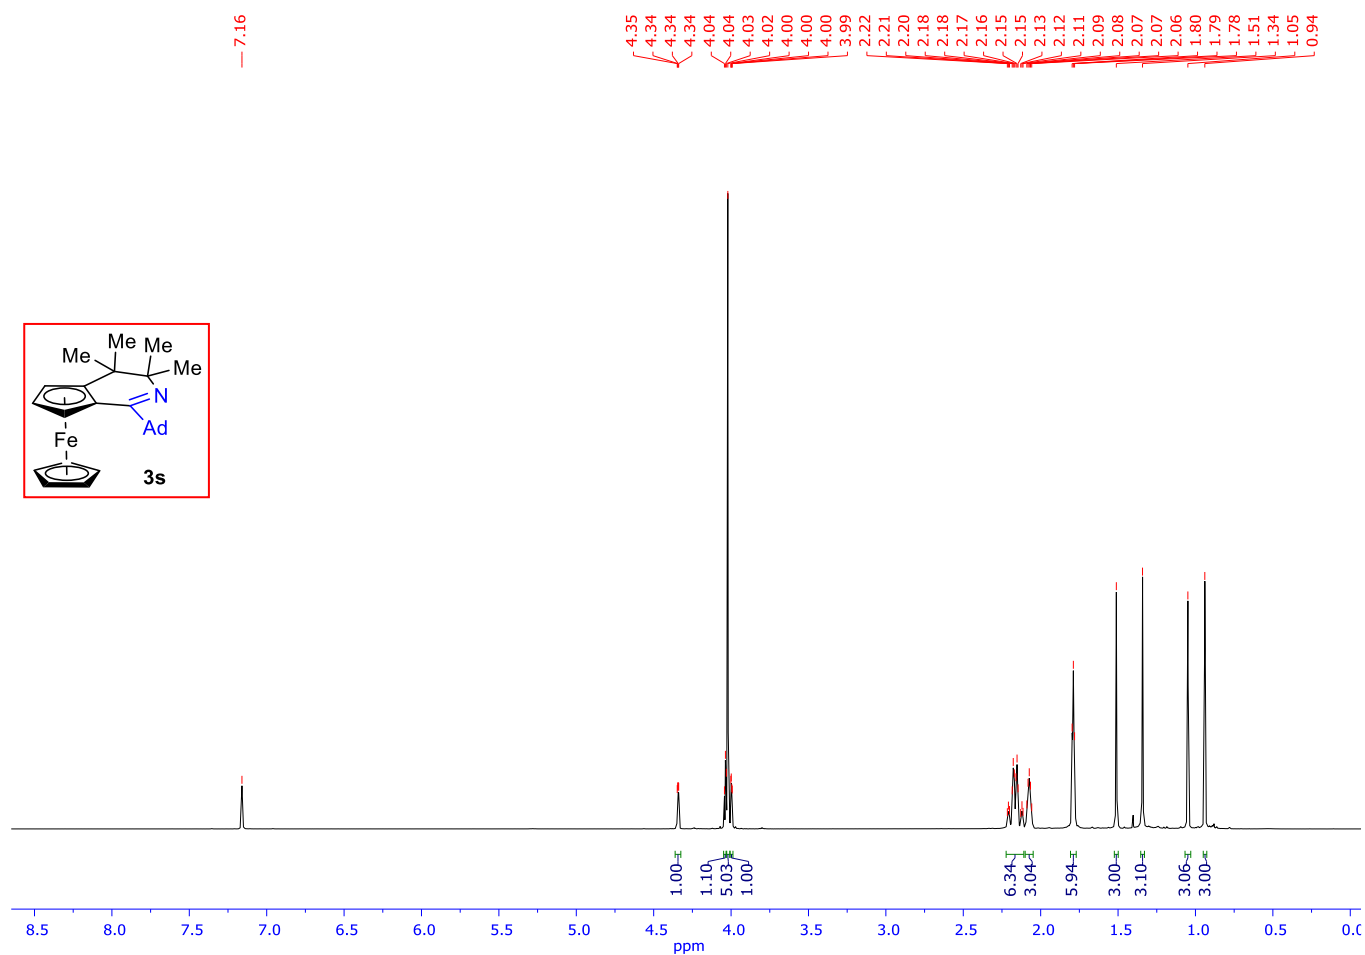

**Figure S43.** <sup>1</sup>H NMR spectrum (400 MHz, C<sub>6</sub>D<sub>6</sub>) of compound **3s**.

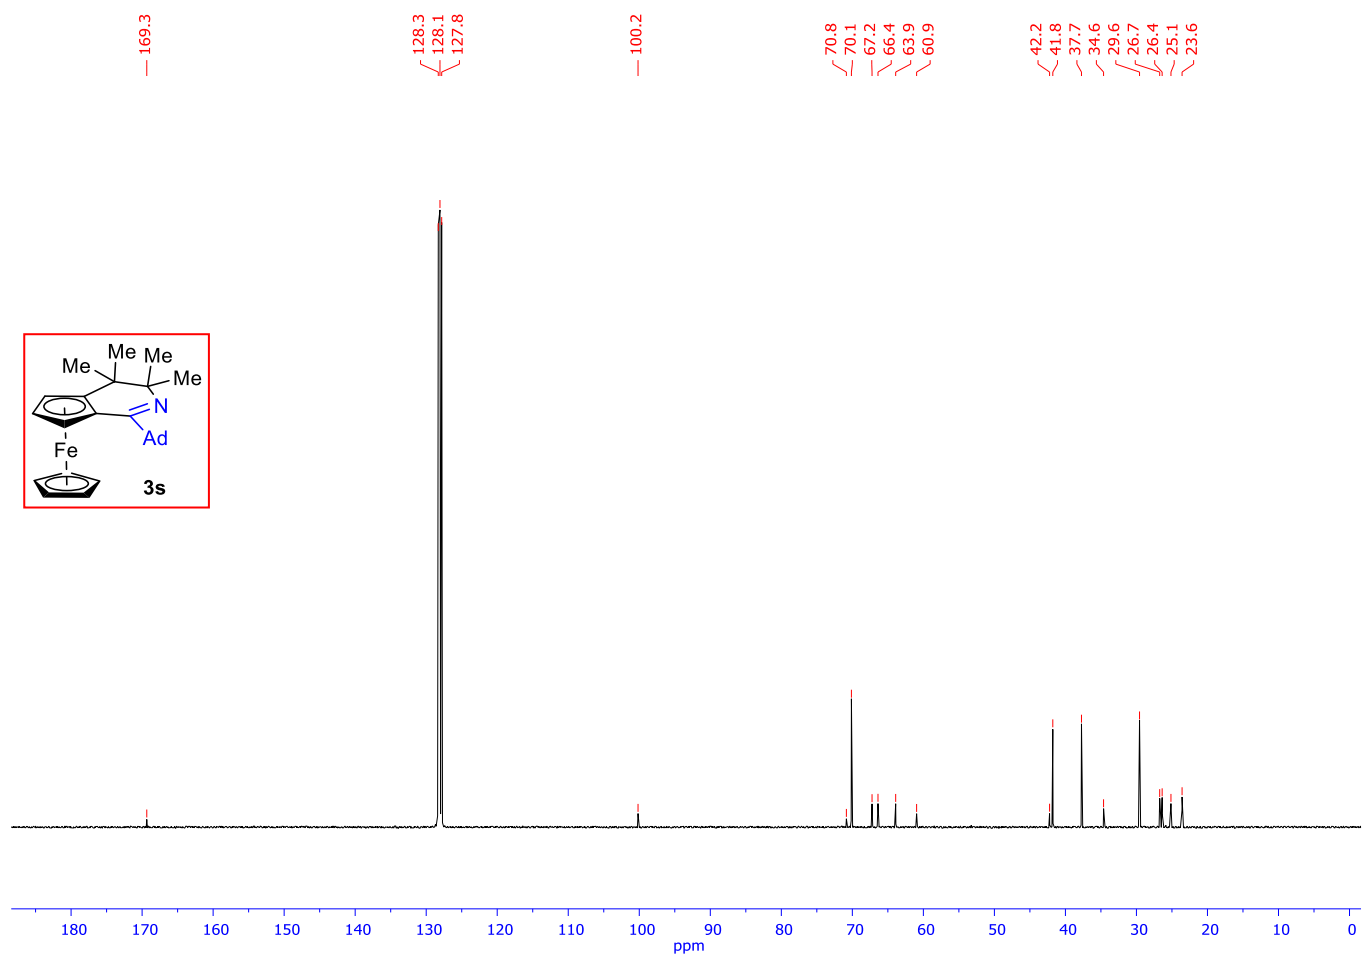

**Figure S44.** <sup>13</sup>C NMR spectrum (100 MHz, C<sub>6</sub>D<sub>6</sub>) of compound **3s**.



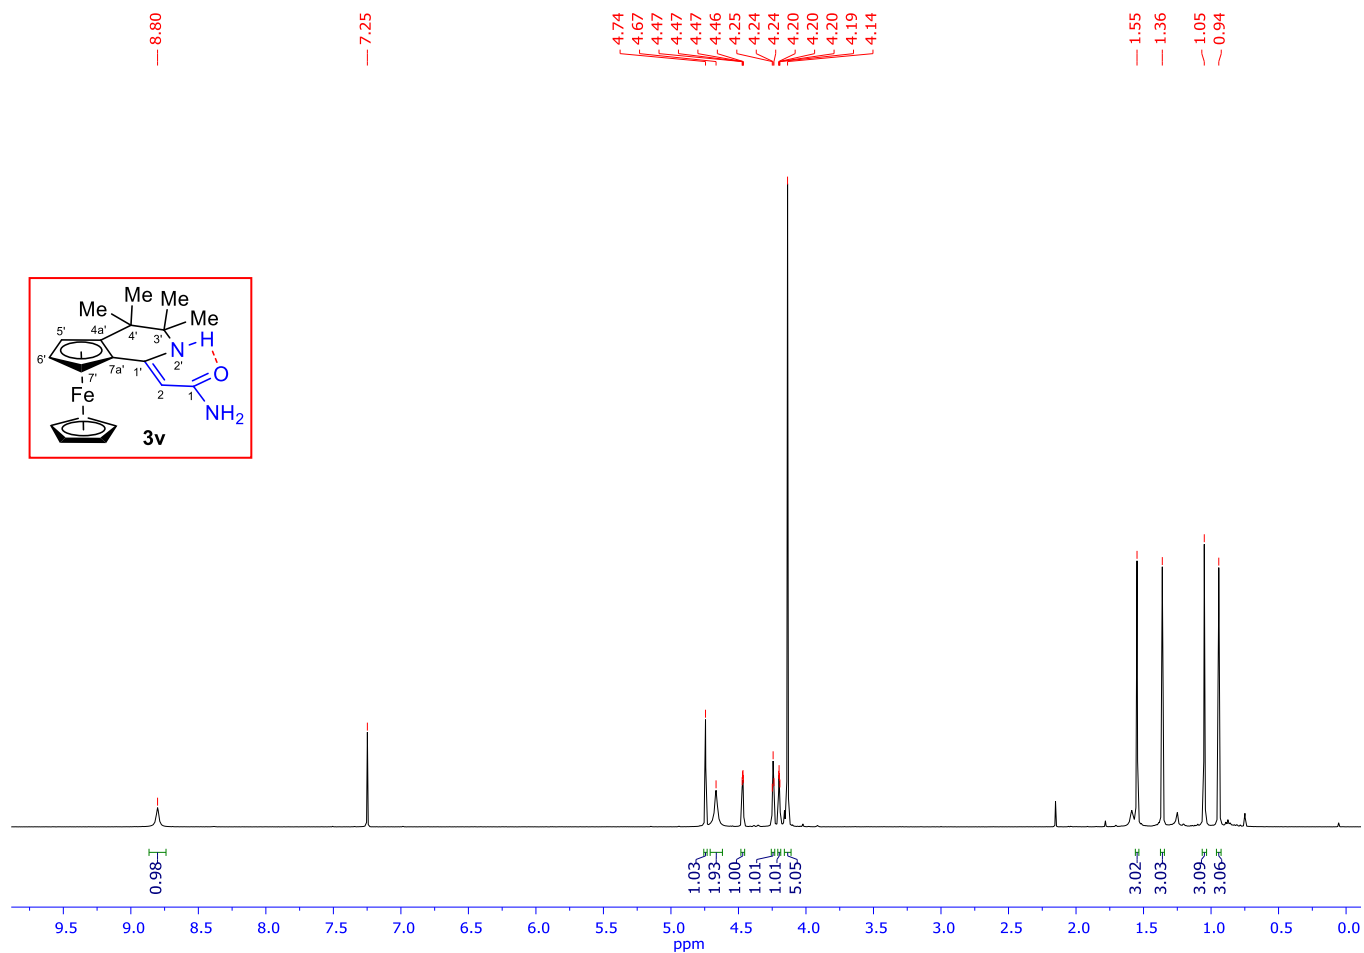

**Figure S47.** <sup>1</sup>H NMR spectrum (400 MHz, CDCl<sub>3</sub>) of compound **3v**.

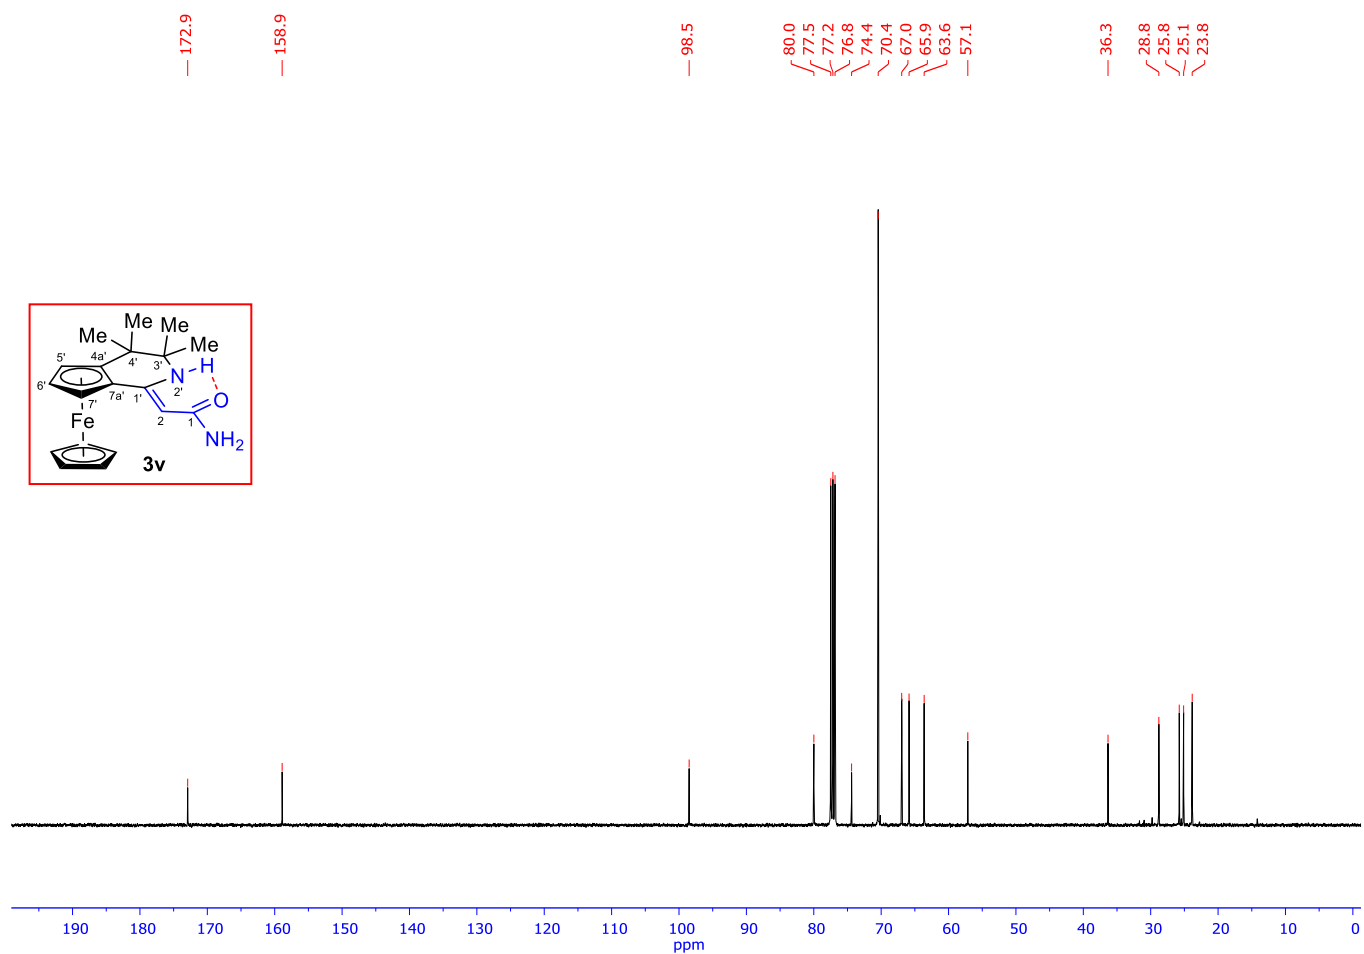

**Figure S48.** <sup>13</sup>C NMR spectrum (100 MHz, CDCl<sub>3</sub>) of compound **3v**.



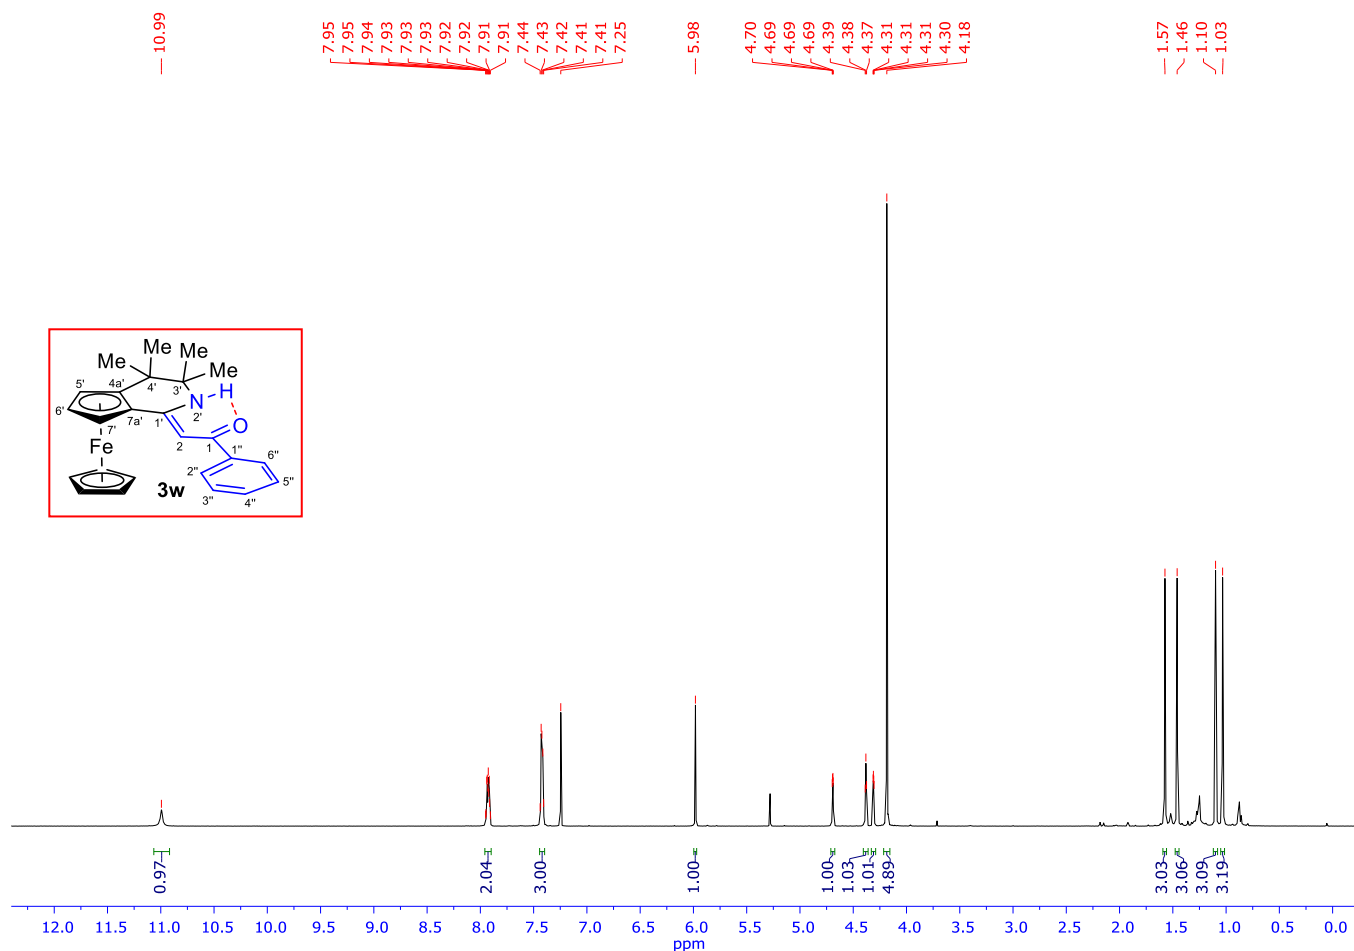

**Figure S49.** <sup>1</sup>H NMR spectrum (400 MHz, CDCl<sub>3</sub>) of compound **3w**.

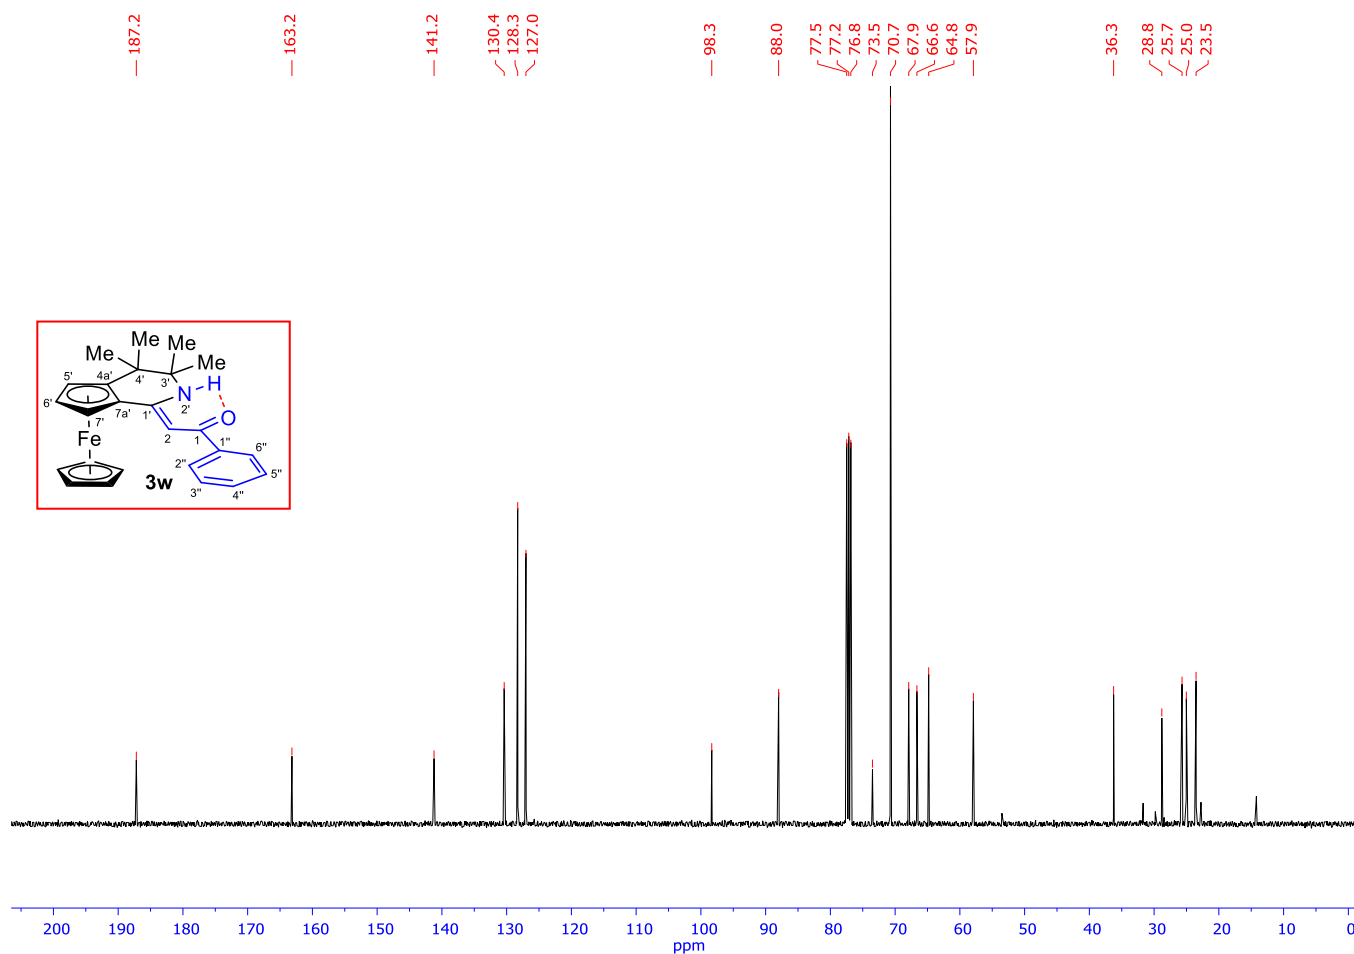

**Figure S50.** <sup>13</sup>C NMR spectrum (100 MHz, CDCl<sub>3</sub>) of compound **3w**.

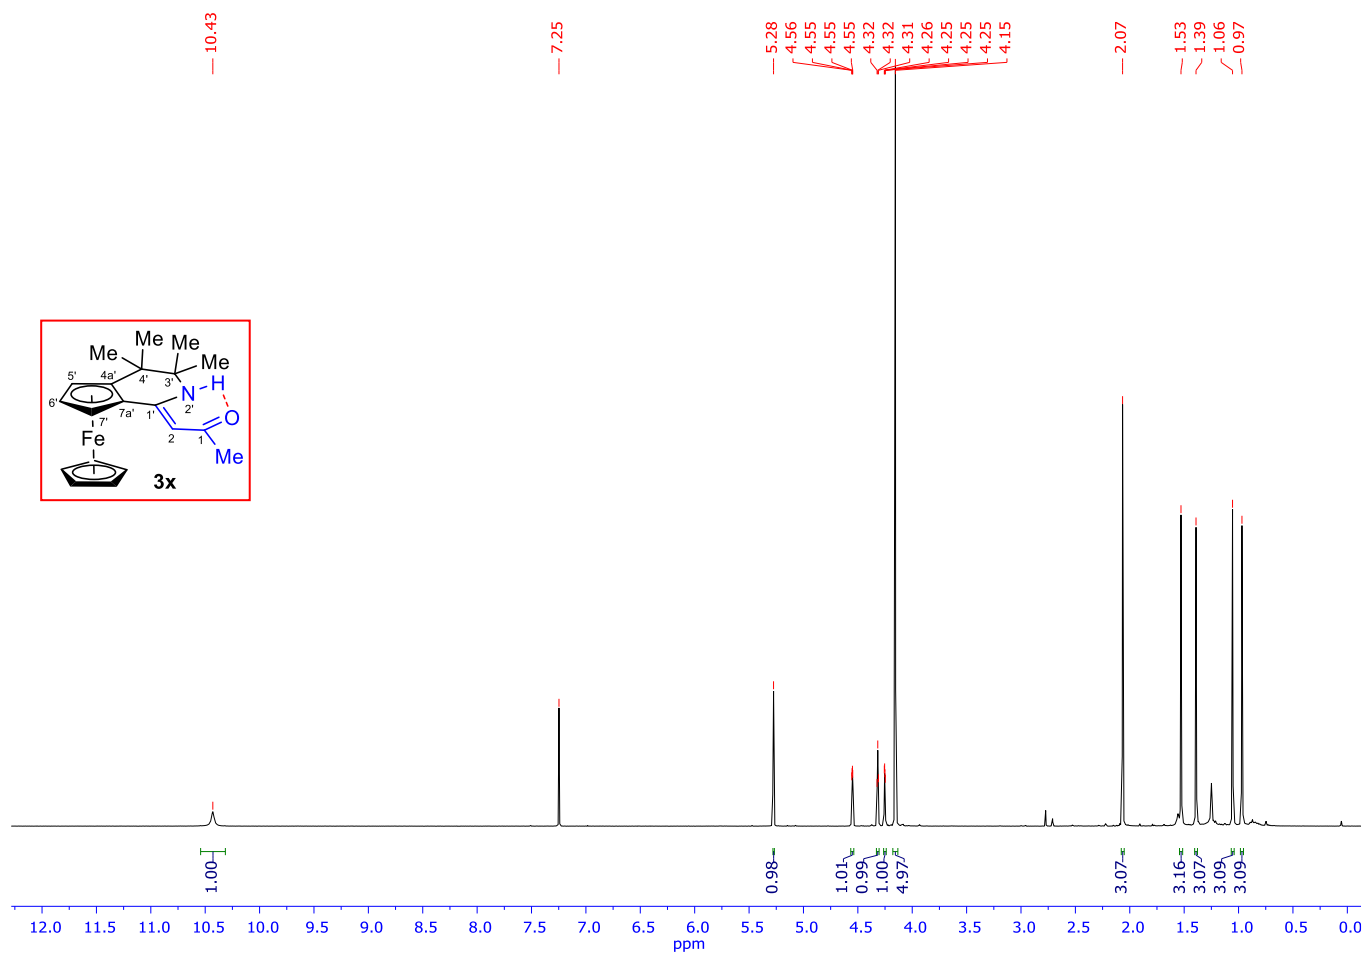

**Figure S51.** <sup>1</sup>H NMR spectrum (400 MHz, CDCl<sub>3</sub>) of compound **3x**.

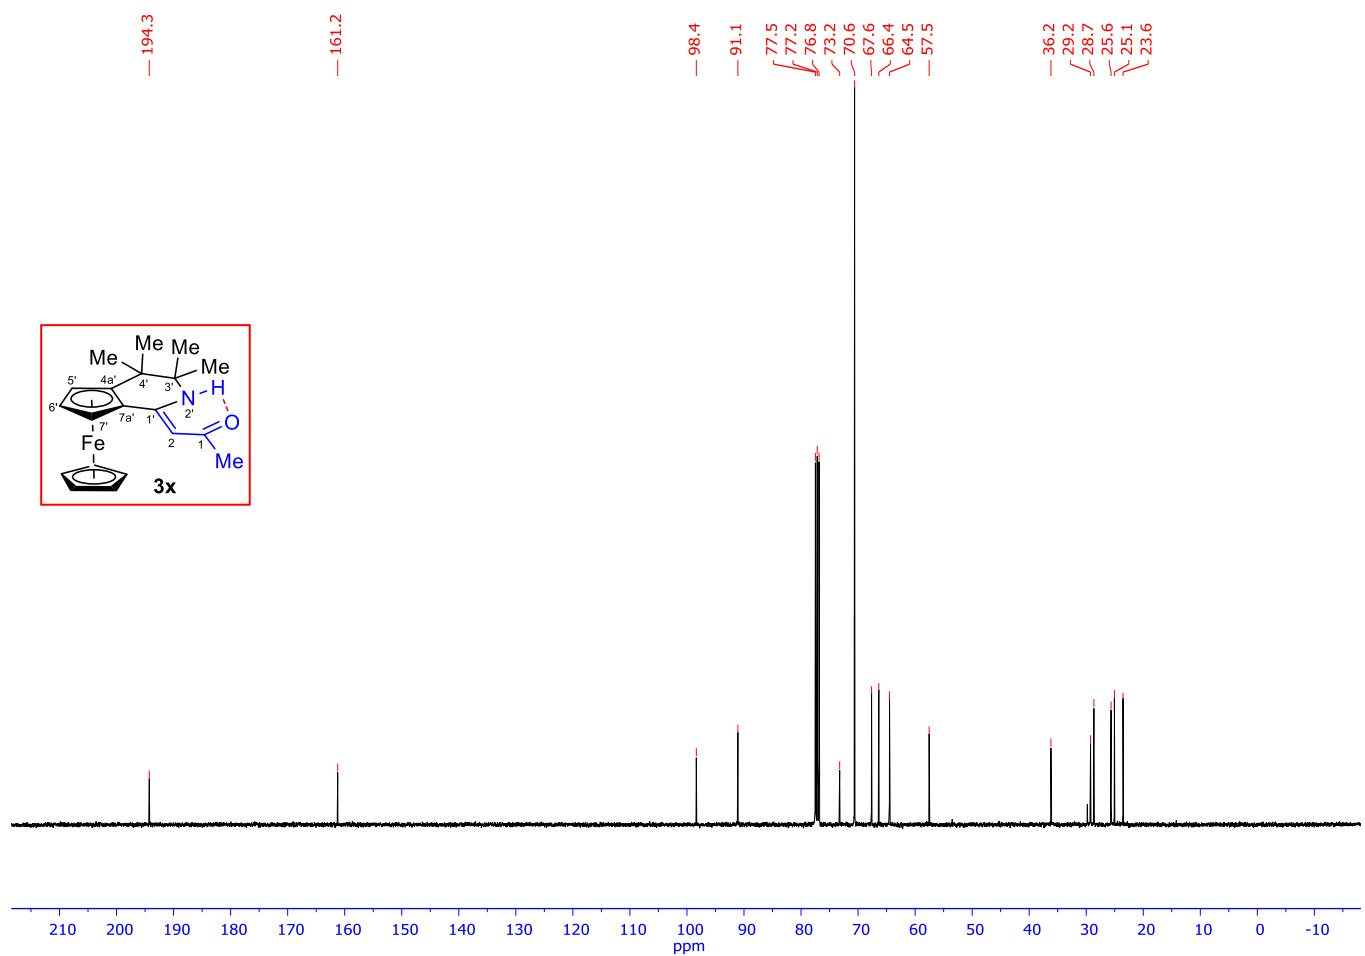

**Figure S52.** <sup>13</sup>C NMR spectrum (100 MHz, CDCl<sub>3</sub>) of compound **3x**.

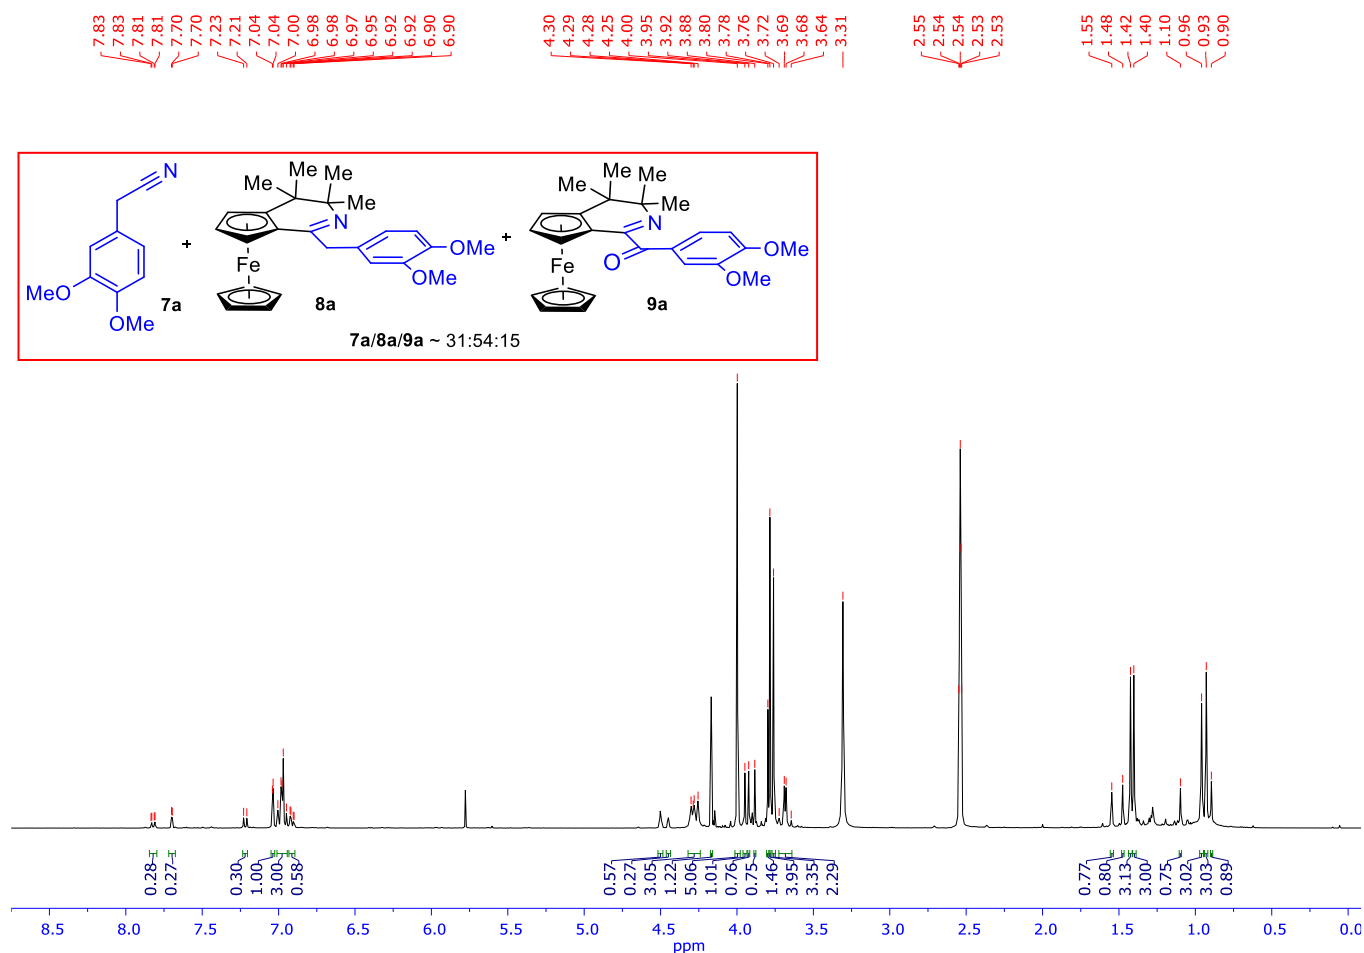

**Figure S53.** <sup>1</sup>H NMR spectrum (400 MHz, DMSO-*d*<sub>6</sub>) of mixture of compounds 7a, 8a and 9a.

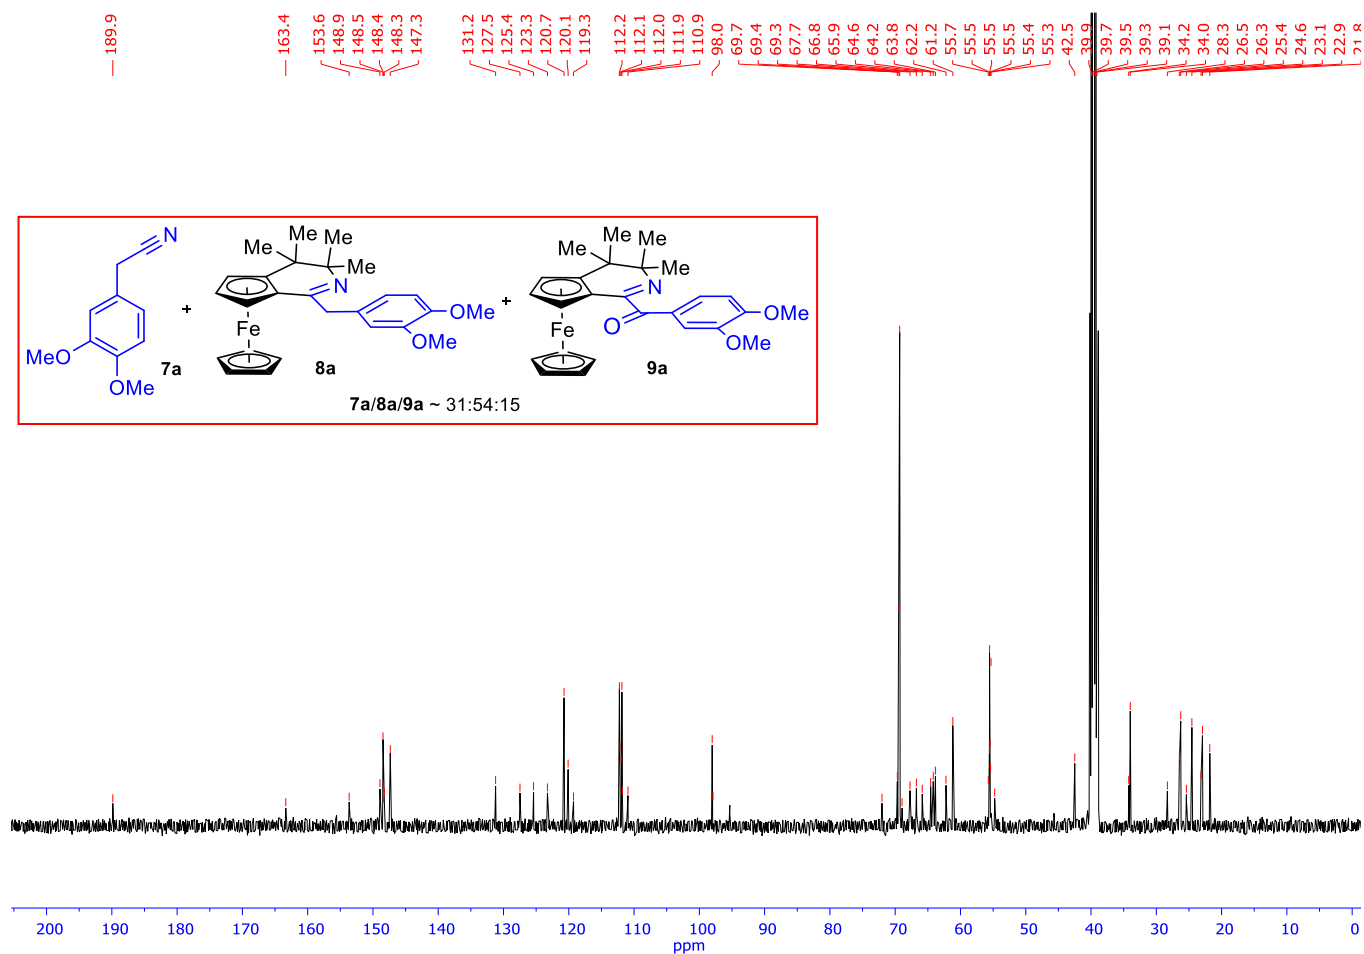

**Figure S54.** <sup>13</sup>C NMR spectrum (100 MHz, DMSO-*d*<sub>6</sub>) of mixture of compounds 7a, 8a and 9a.

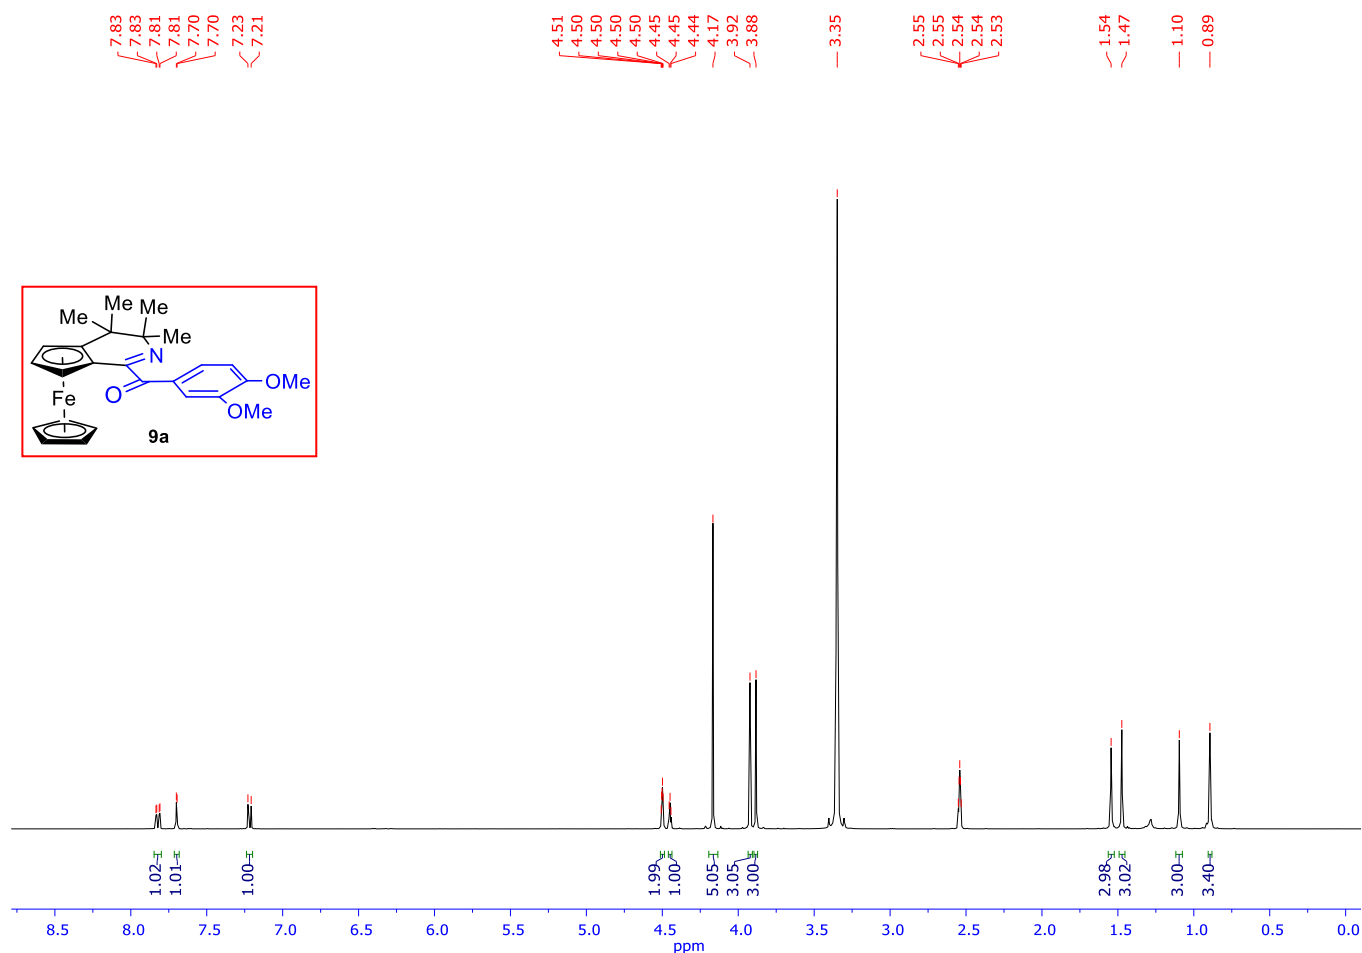

**Figure S55.** <sup>1</sup>H NMR spectrum (400 MHz, DMSO-*d*<sub>6</sub>) of compound **9a**.

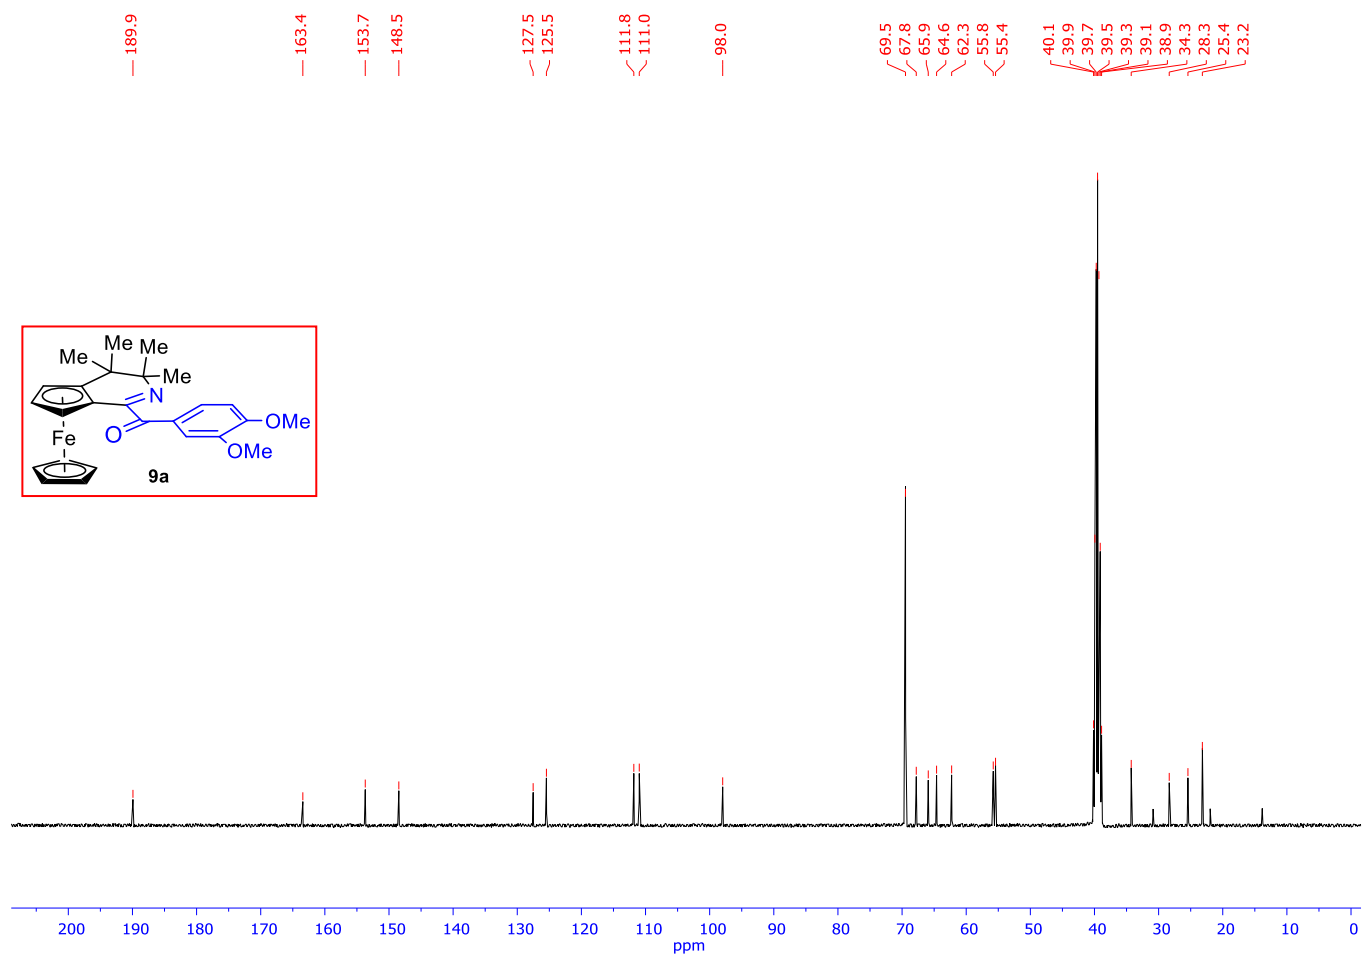

**Figure S56.** <sup>13</sup>C NMR spectrum (100 MHz, DMSO-*d*<sub>6</sub>) of compound **9a**.

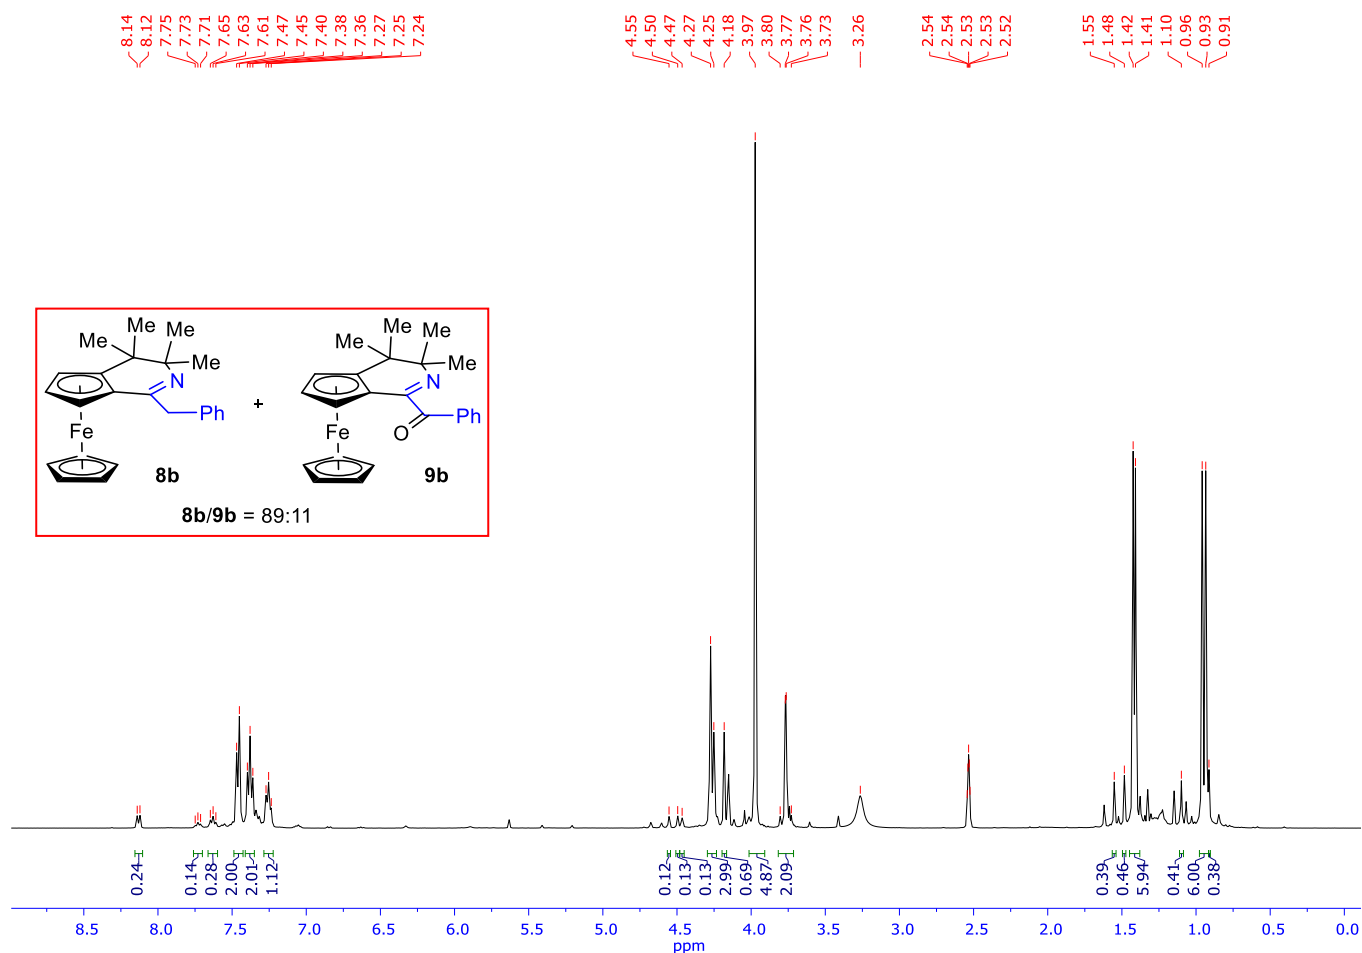

**Figure S57.**  $^1\text{H}$  NMR spectrum (400 MHz,  $\text{DMSO}-d_6$ ) of mixture of compounds **8b** and **9b**.

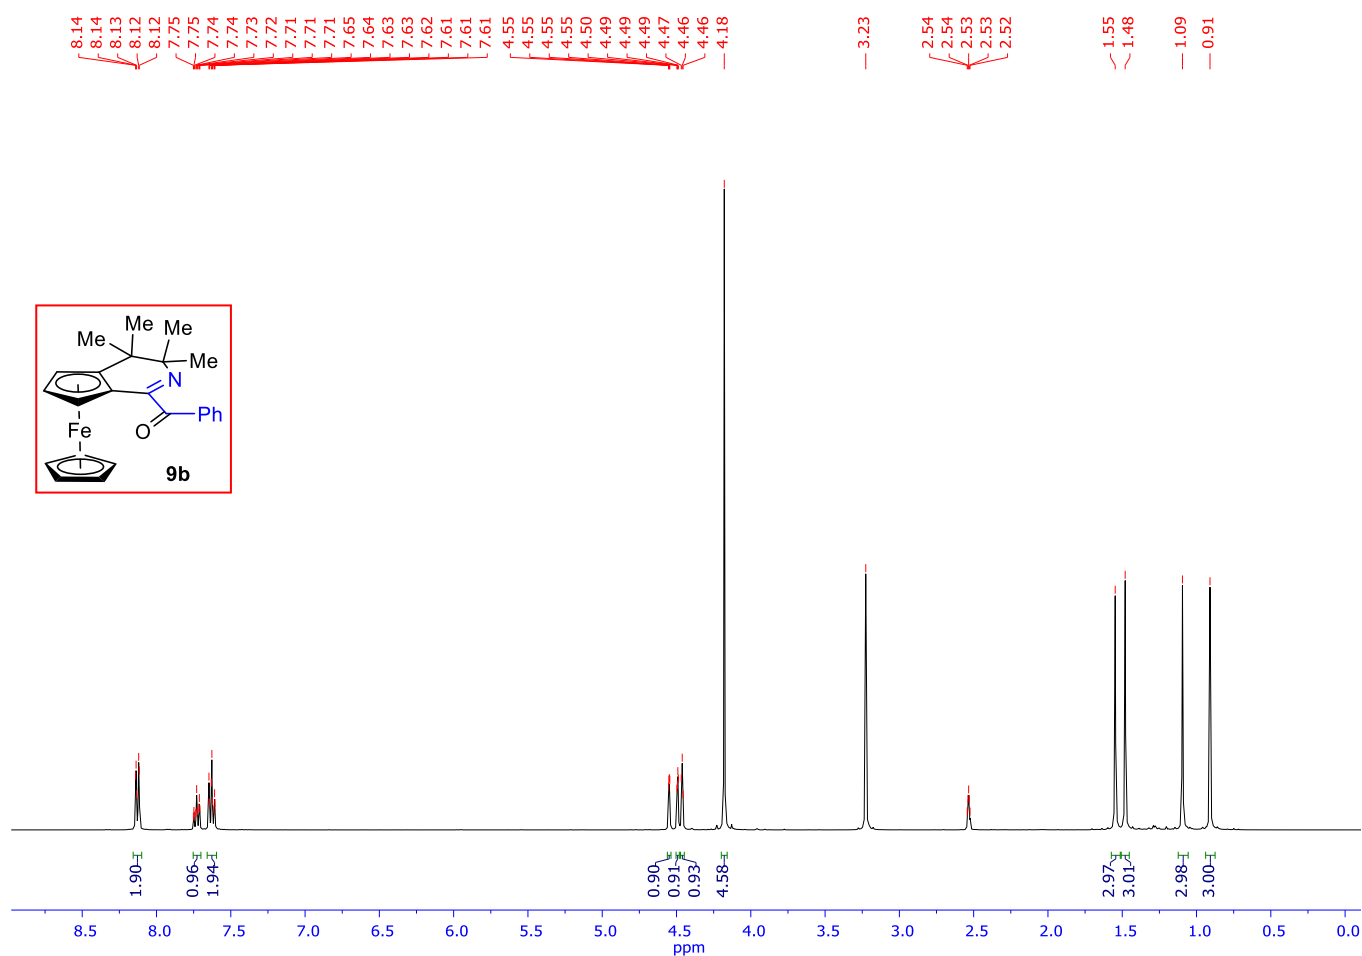

**Figure S58.**  $^1\text{H}$  NMR spectrum (400 MHz,  $\text{DMSO}-d_6$ ) of compound **9b**.

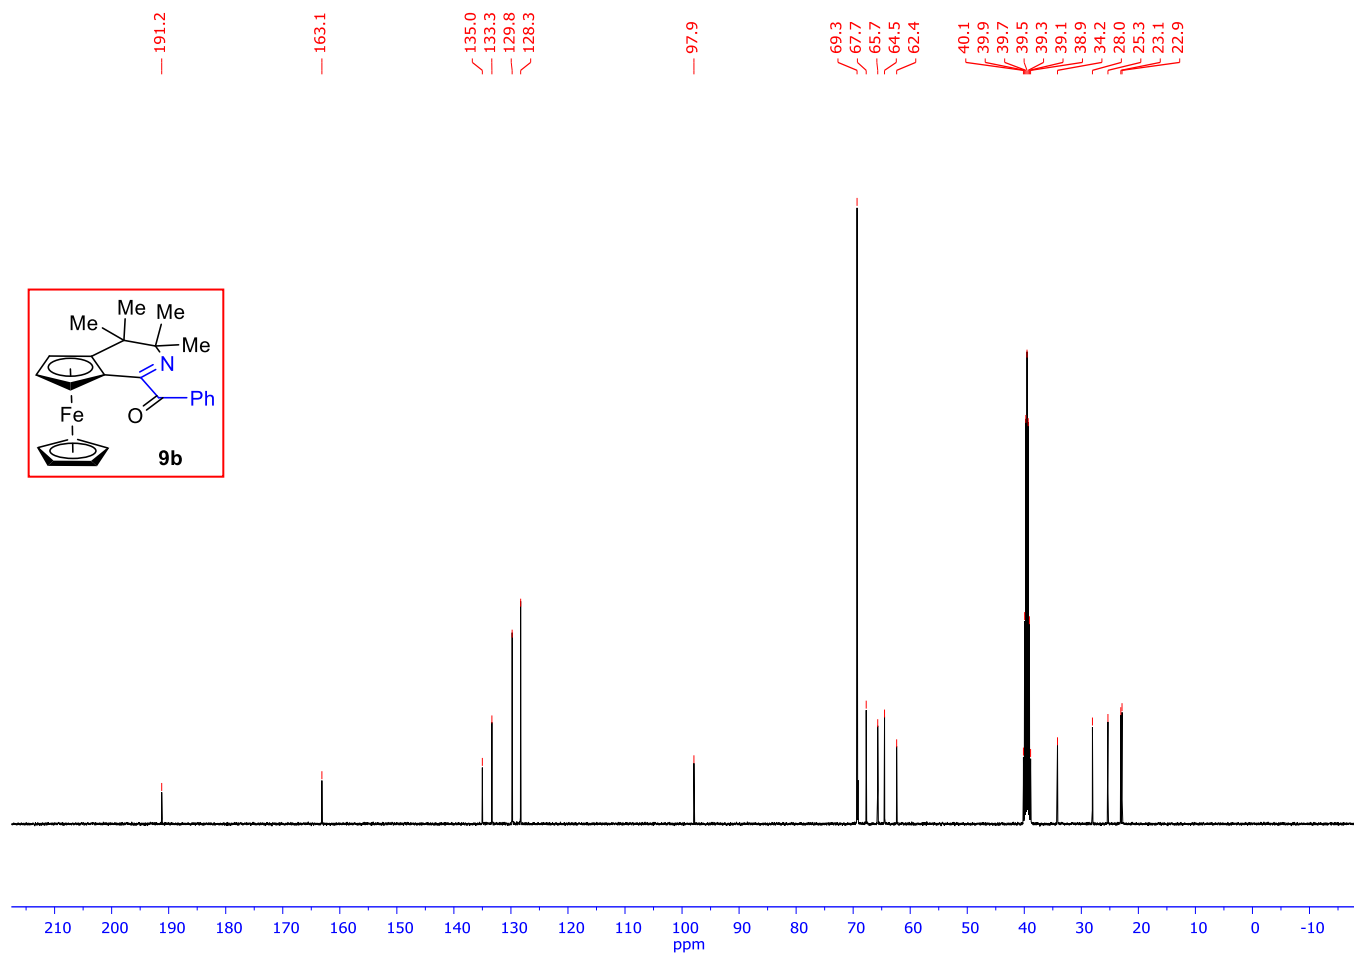

**Figure S59.** <sup>13</sup>C NMR spectrum (100 MHz, DMSO-*d*<sub>6</sub>) of compound **9b**.

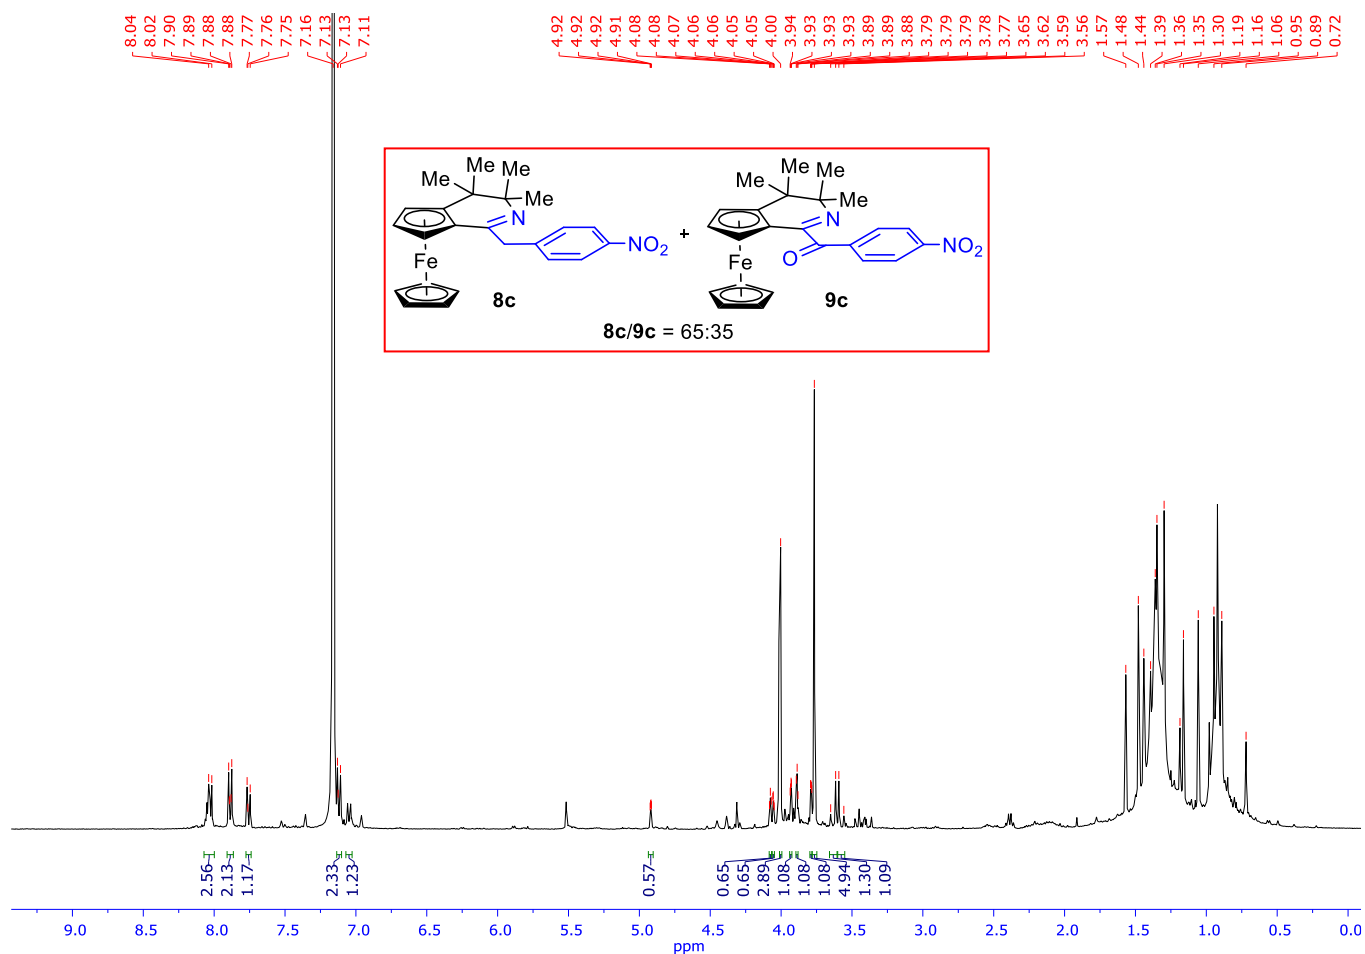

**Figure S60.** <sup>1</sup>H NMR spectrum (400 MHz, C<sub>6</sub>D<sub>6</sub>) of mixture of compounds **8c** and **9c**.

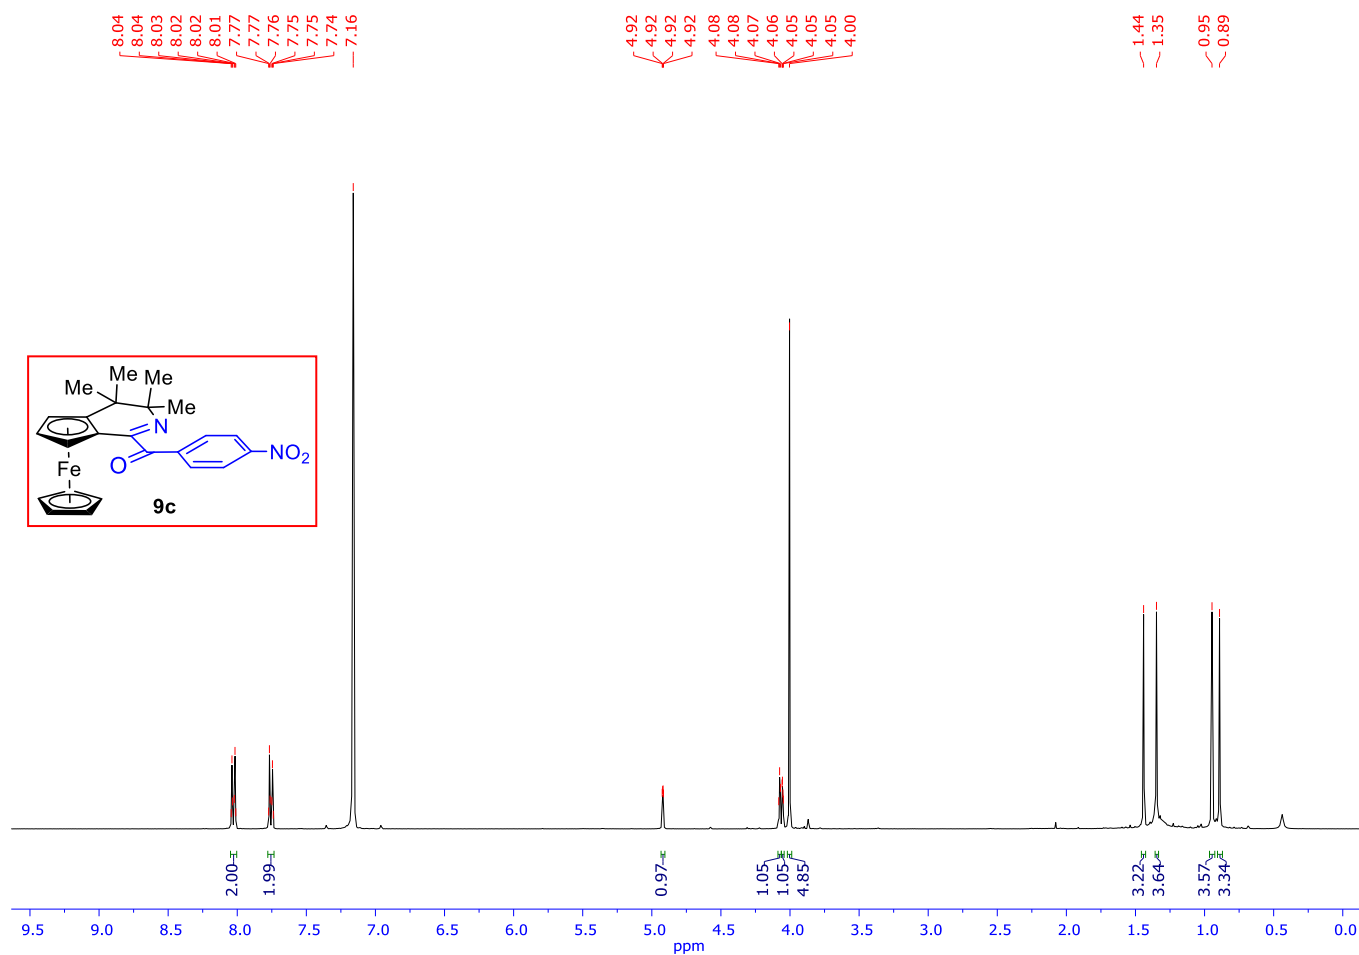

**Figure S61.** <sup>1</sup>H NMR spectrum (400 MHz, C<sub>6</sub>D<sub>6</sub>) of compound **9c**.

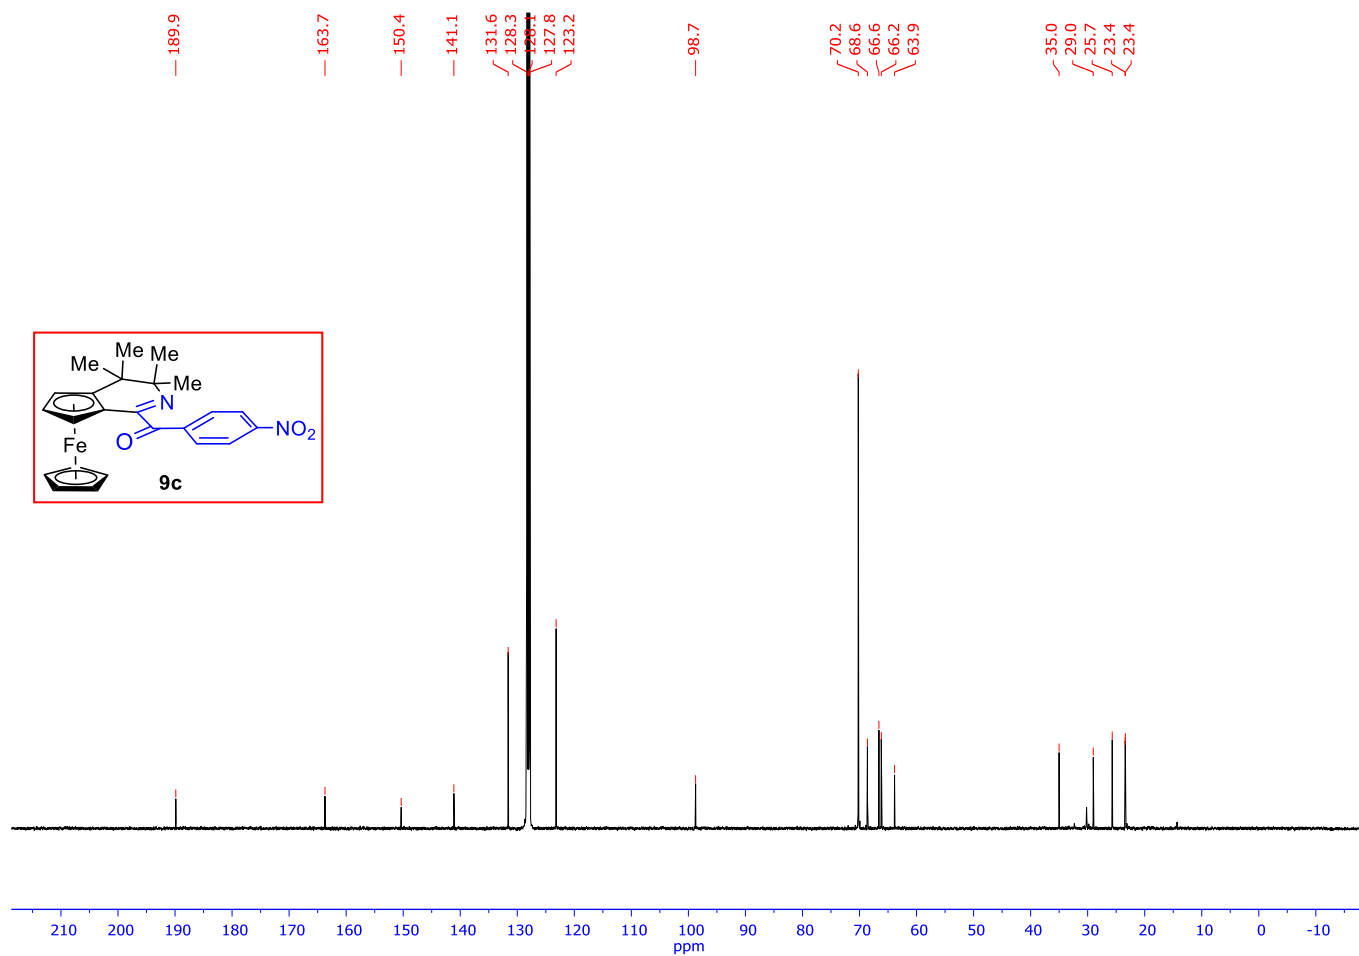

**Figure S62.** <sup>13</sup>C NMR spectrum (100 MHz, C<sub>6</sub>D<sub>6</sub>) of compound **9c**.

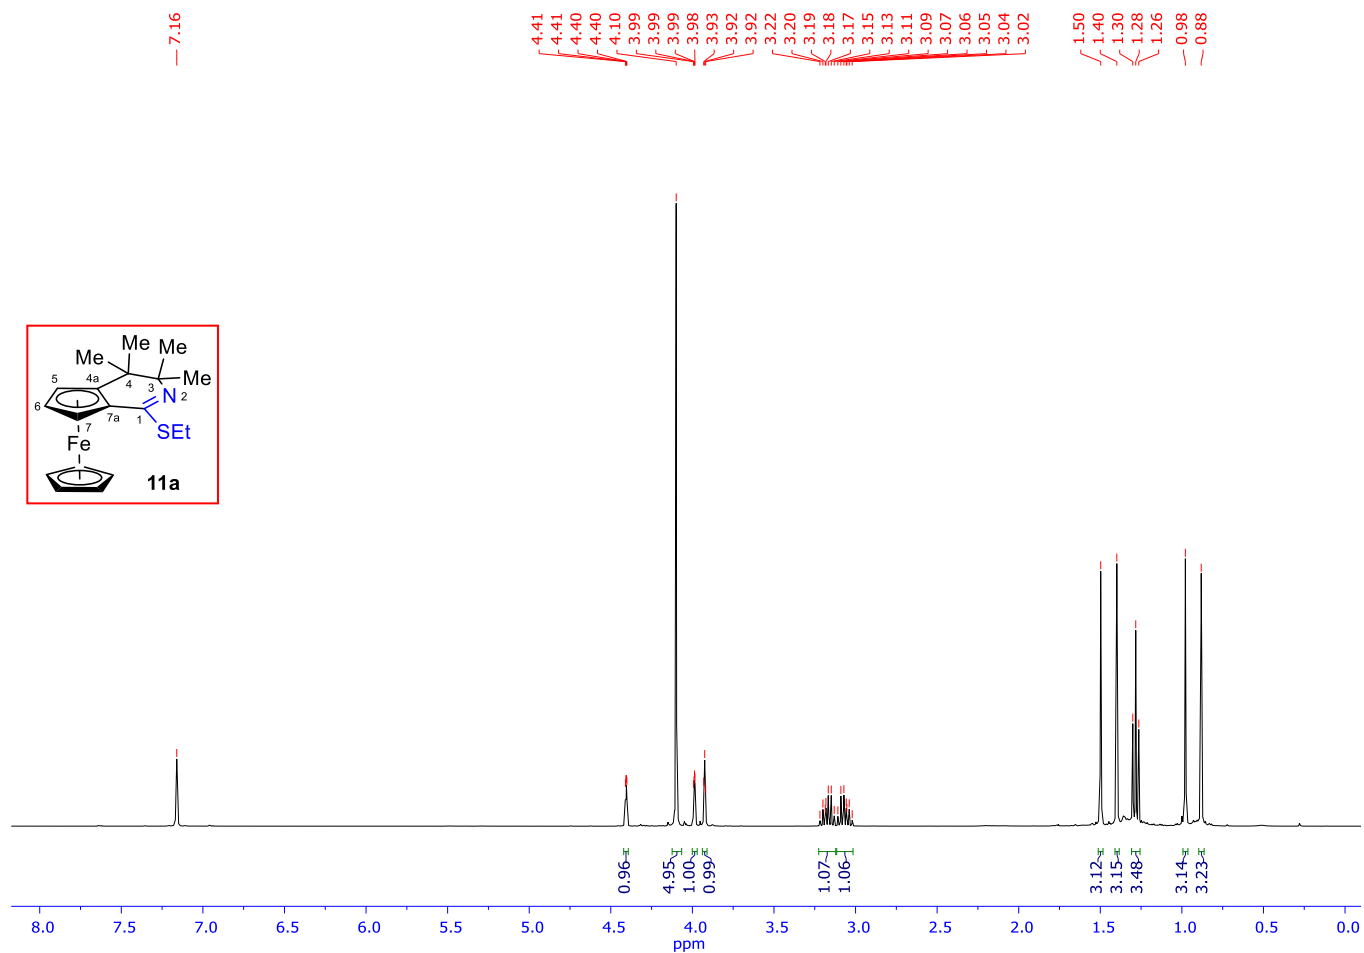

**Figure S63.** <sup>1</sup>H NMR spectrum (400 MHz, C<sub>6</sub>D<sub>6</sub>) of compound **11a**.

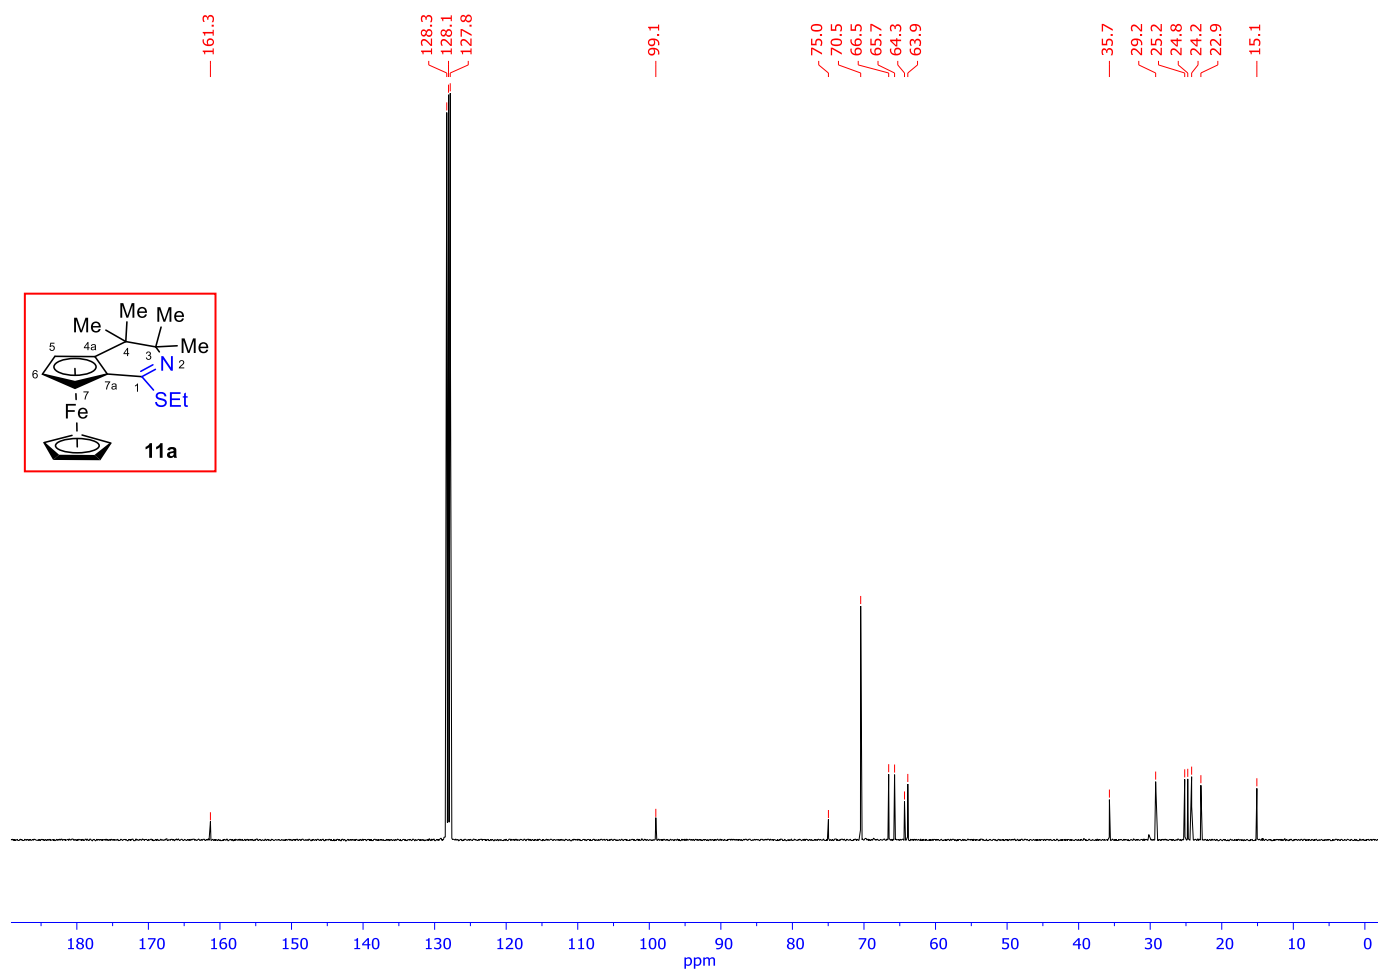

**Figure S64.** <sup>13</sup>C NMR spectrum (100 MHz, C<sub>6</sub>D<sub>6</sub>) of compound **11a**.



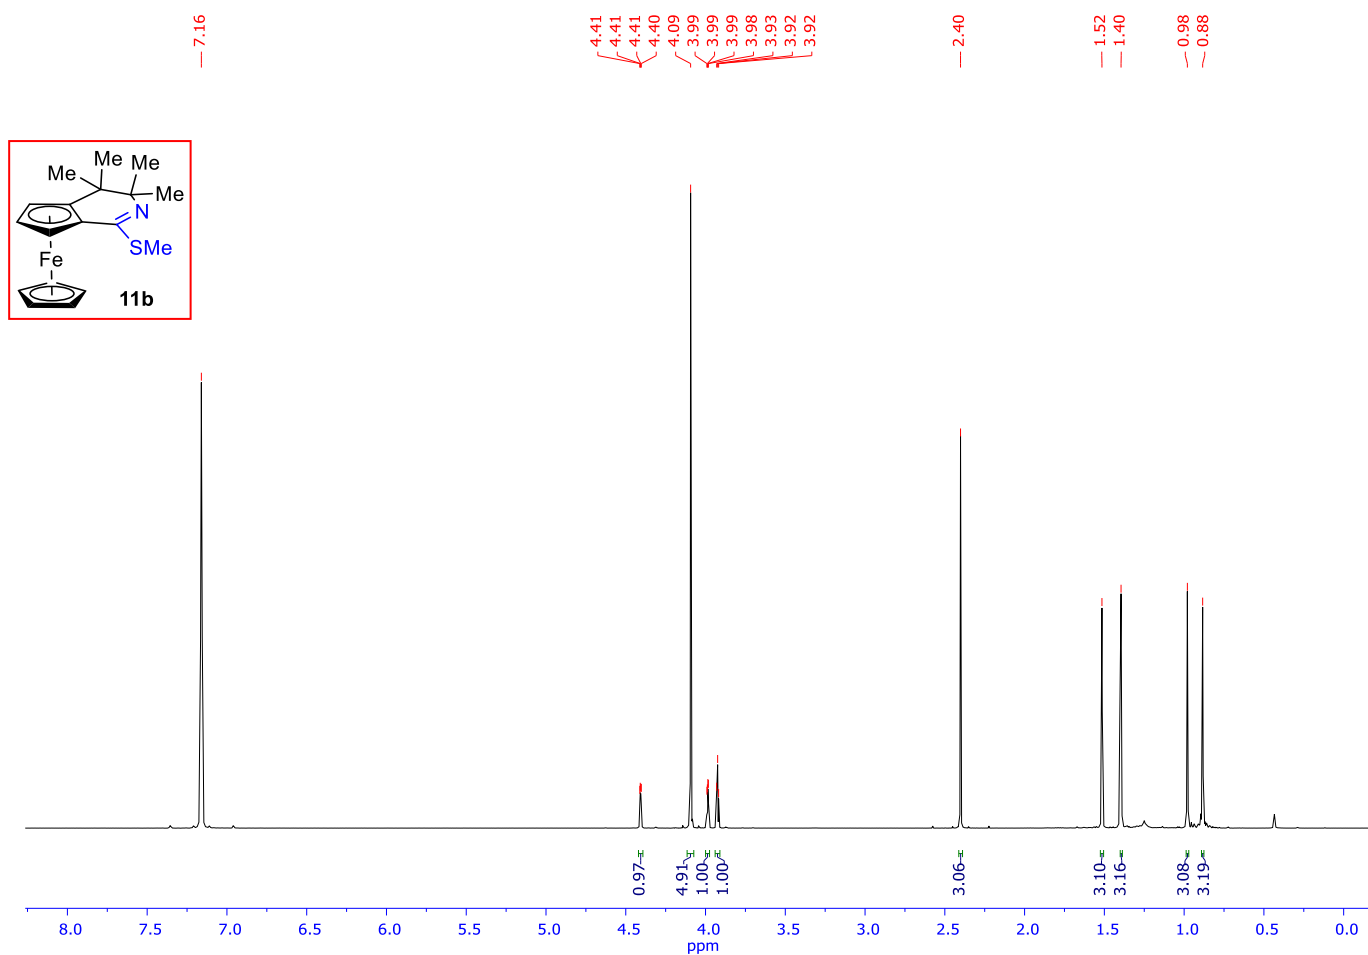

**Figure S65.** <sup>1</sup>H NMR spectrum (400 MHz, C<sub>6</sub>D<sub>6</sub>) of compound **11b**.

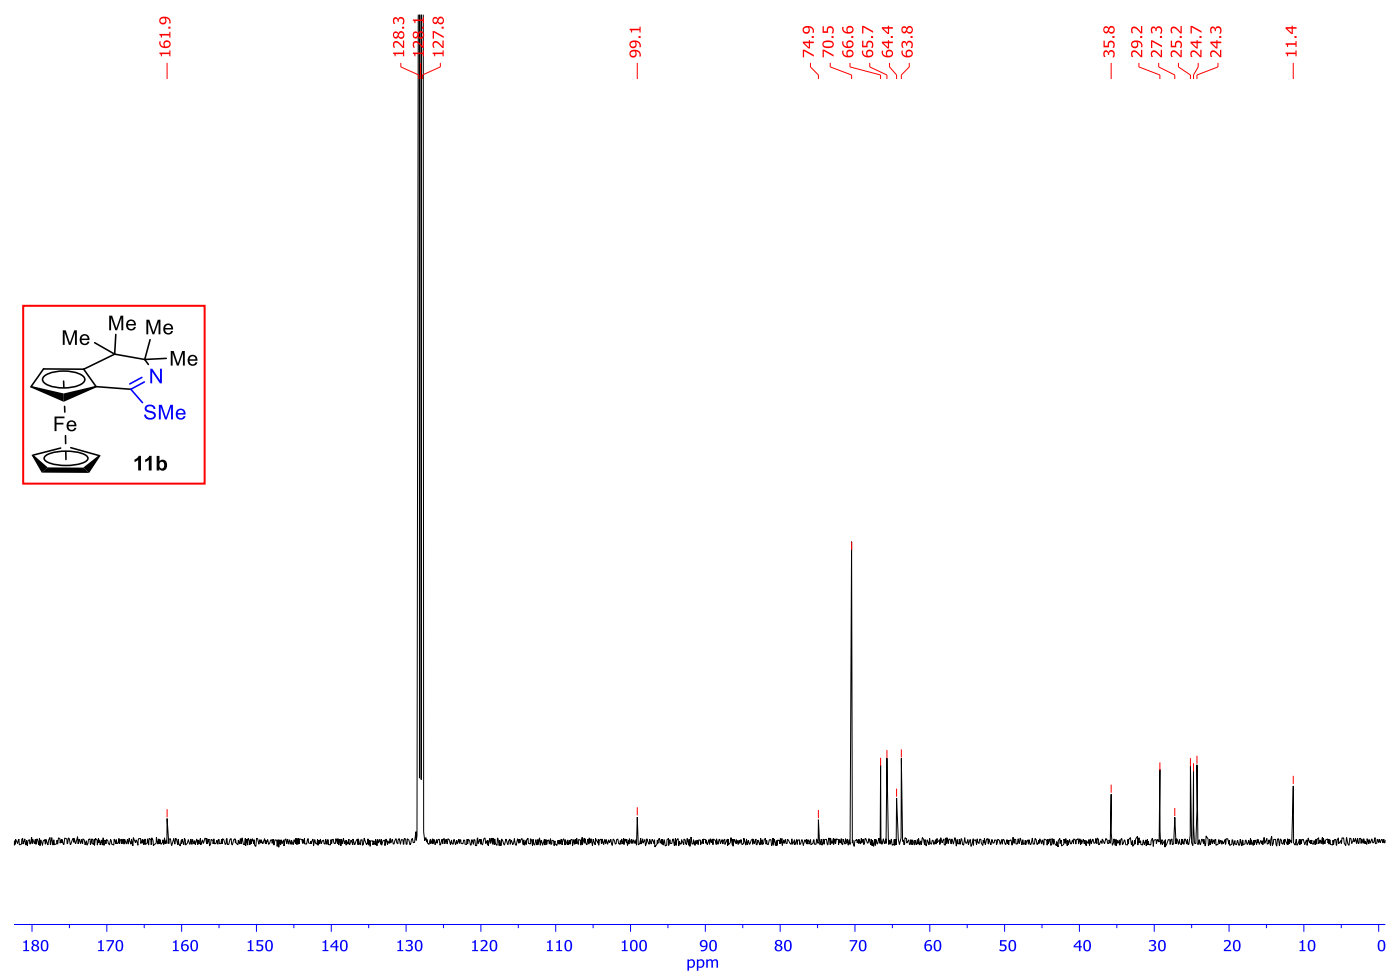

**Figure S66.** <sup>13</sup>C NMR spectrum (100 MHz, C<sub>6</sub>D<sub>6</sub>) of compound **11b**.

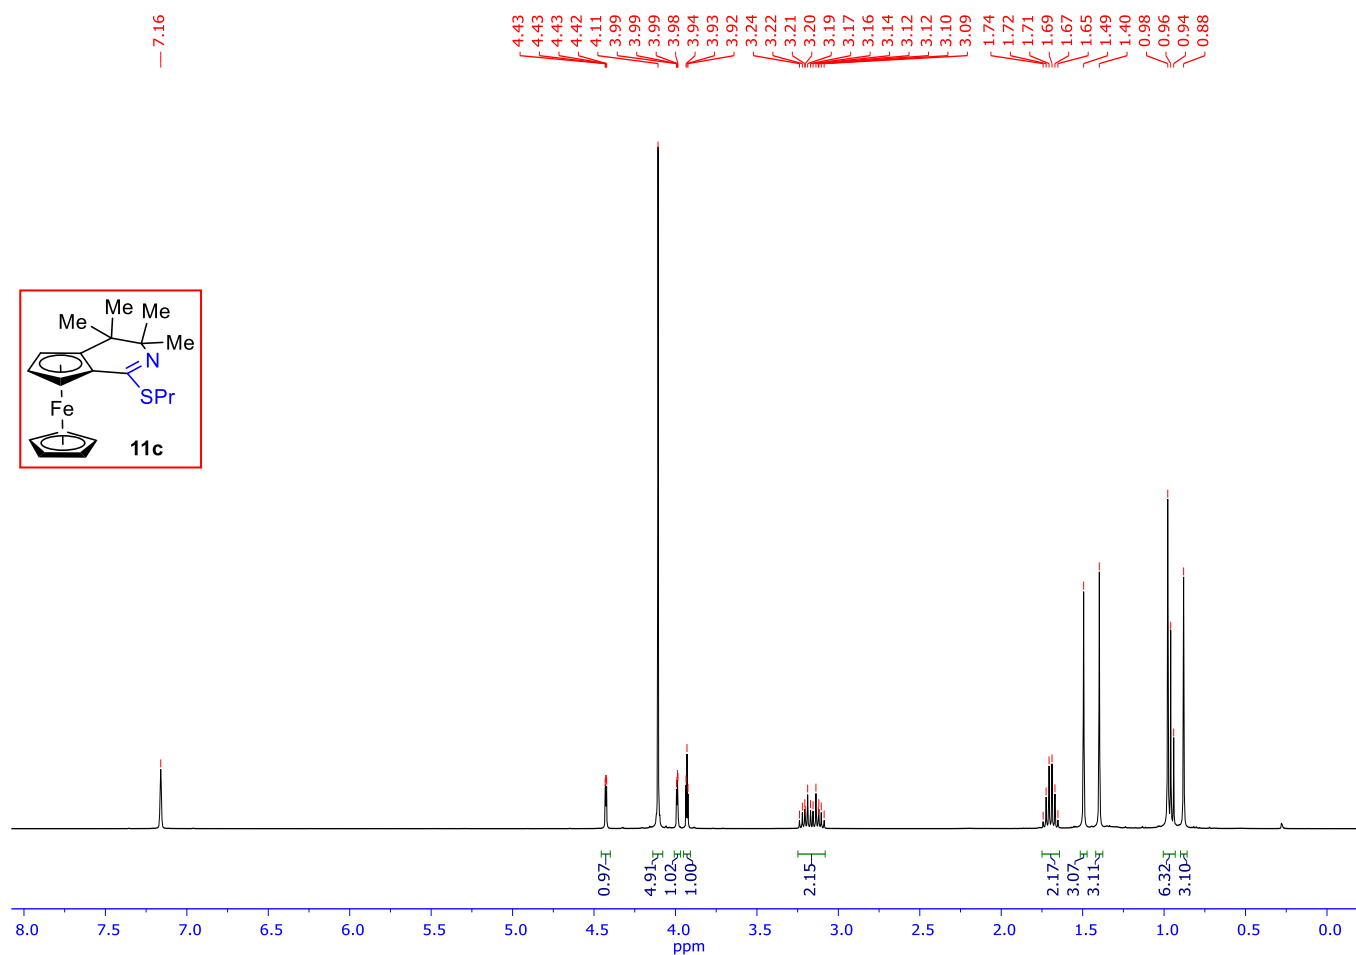

**Figure S67.** <sup>1</sup>H NMR spectrum (400 MHz, C<sub>6</sub>D<sub>6</sub>) of compound **11c**.

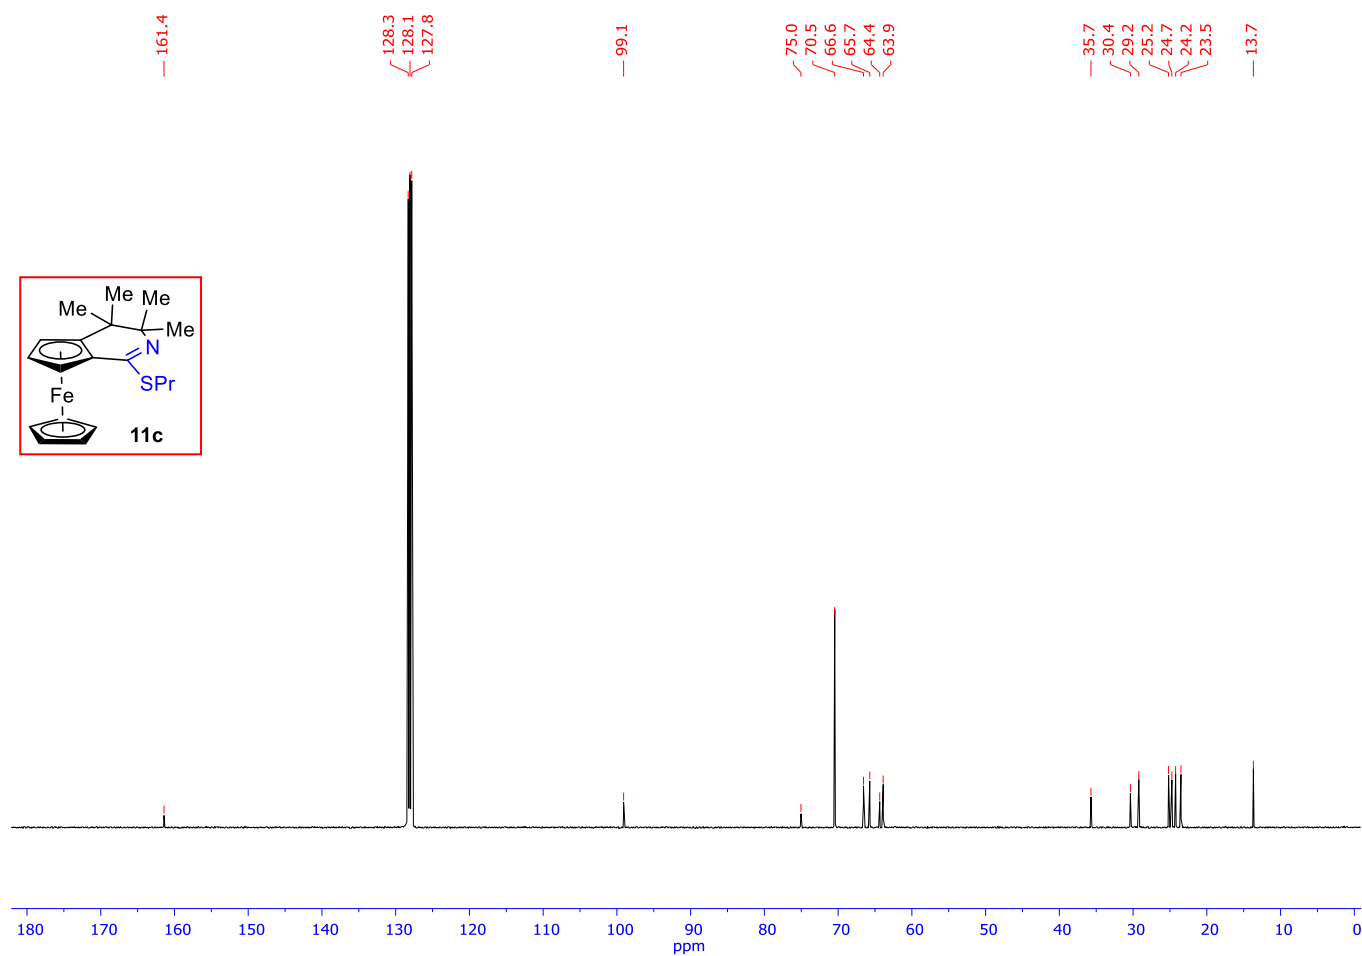

**Figure S68.** <sup>13</sup>C NMR spectrum (100 MHz, C<sub>6</sub>D<sub>6</sub>) of compound **11c**.

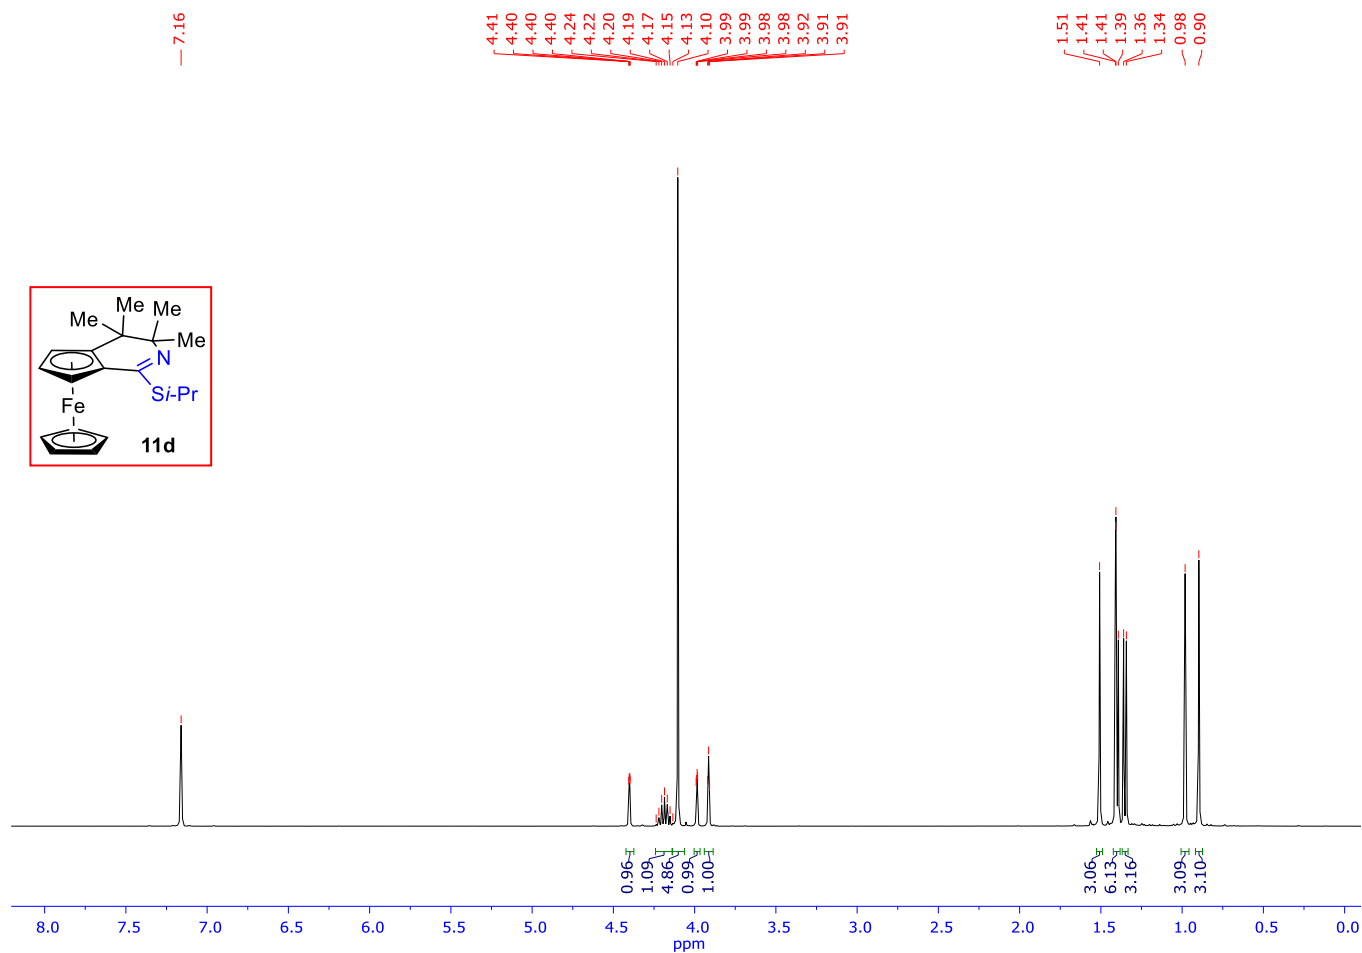

**Figure S69.** <sup>1</sup>H NMR spectrum (400 MHz, C<sub>6</sub>D<sub>6</sub>) of compound **11d**.

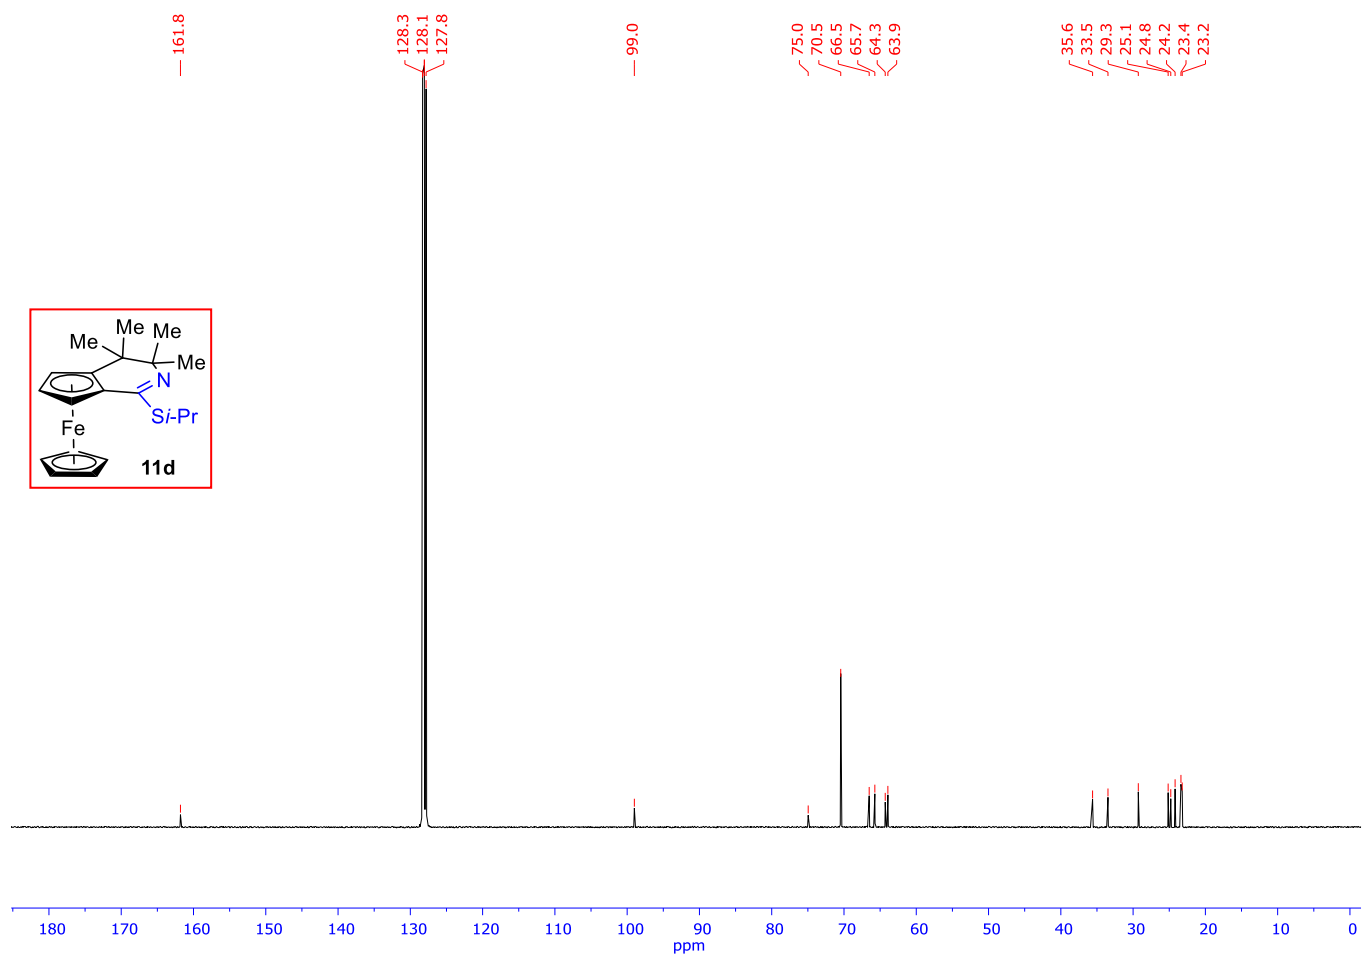

**Figure S70.** <sup>13</sup>C NMR spectrum (100 MHz, C<sub>6</sub>D<sub>6</sub>) of compound **11d**.

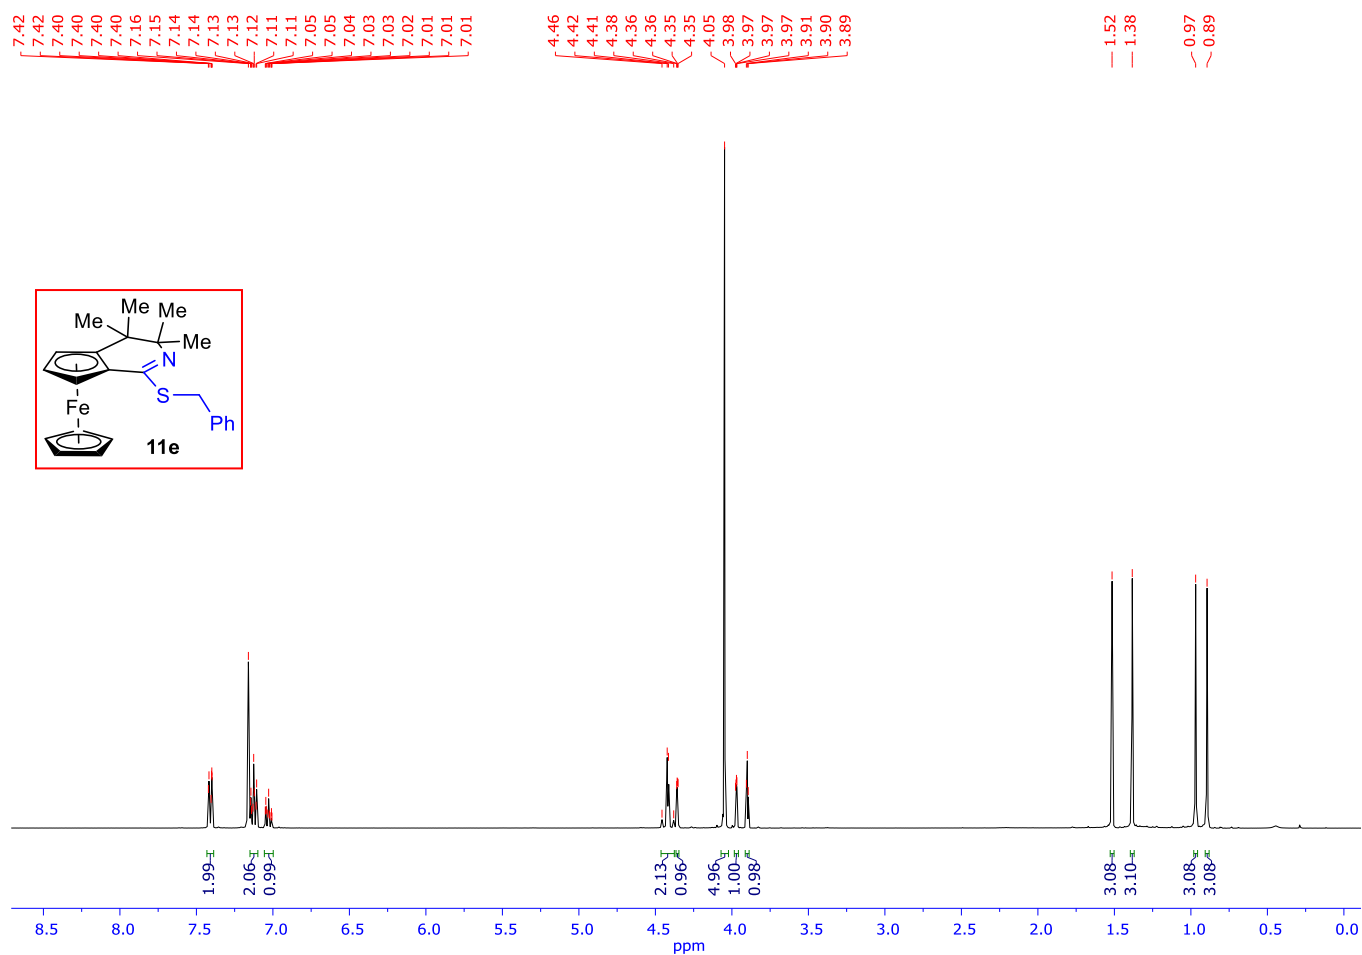

**Figure S71.** <sup>1</sup>H NMR spectrum (400 MHz, C<sub>6</sub>D<sub>6</sub>) of compound **11e**.

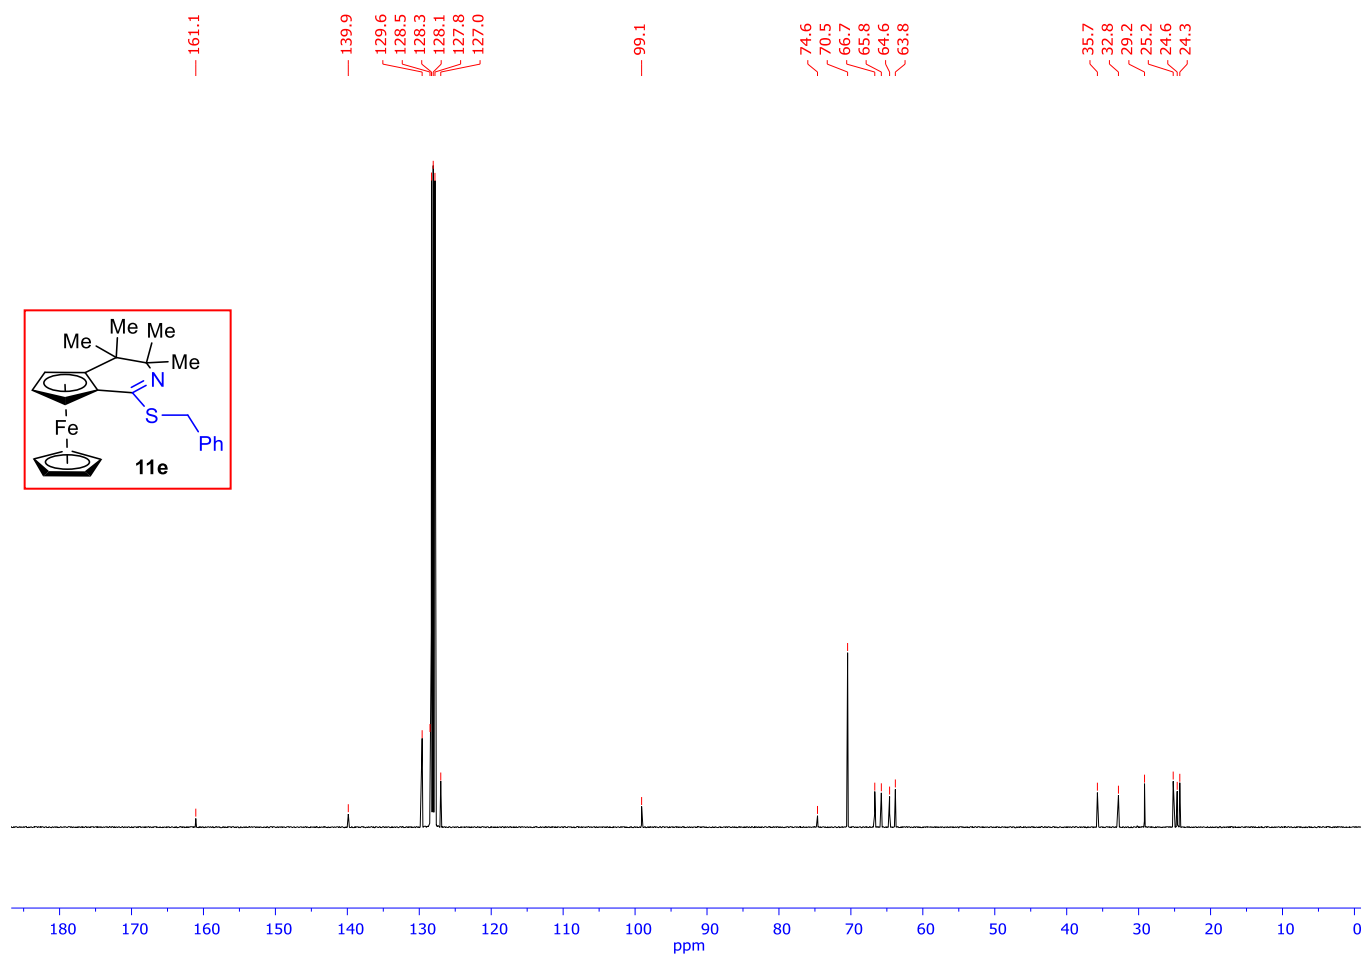

**Figure S72.** <sup>13</sup>C NMR spectrum (100 MHz, C<sub>6</sub>D<sub>6</sub>) of compound **11e**.

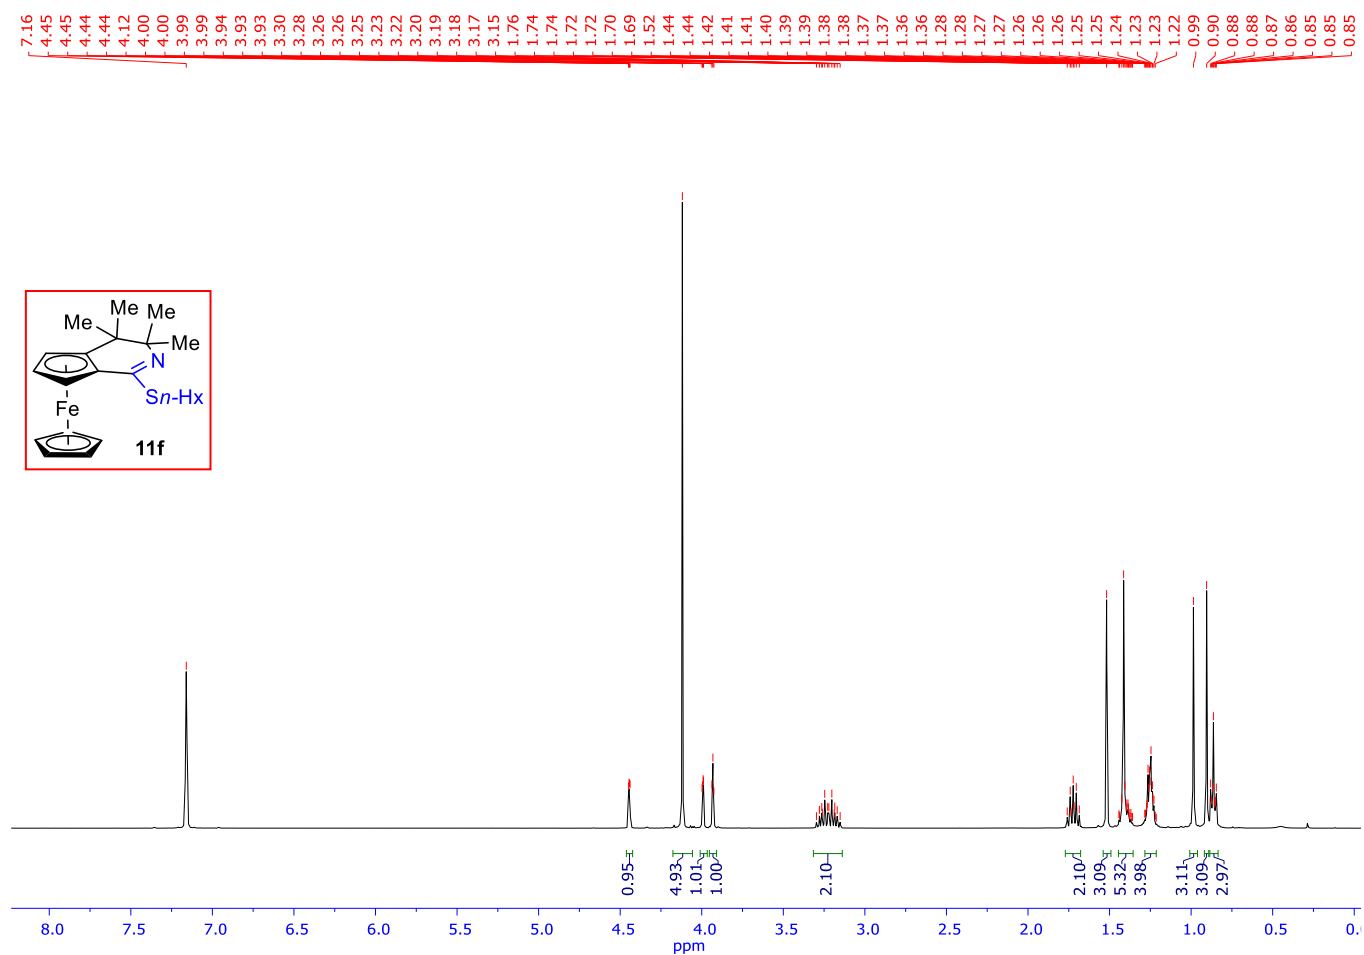

**Figure S73.** <sup>1</sup>H NMR spectrum (400 MHz, C<sub>6</sub>D<sub>6</sub>) of compound **11f**.

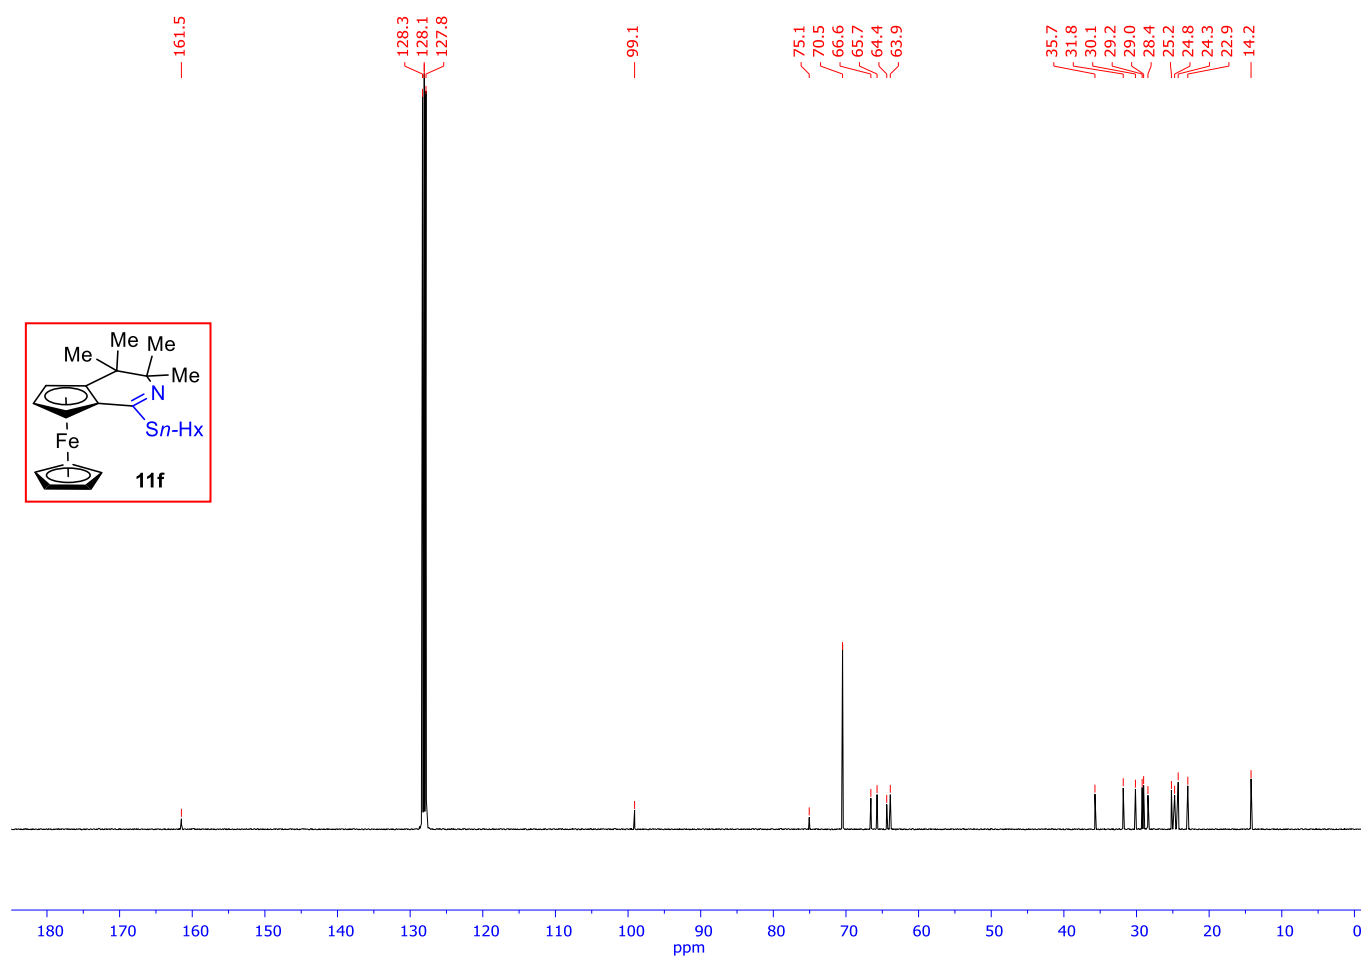

**Figure S74.** <sup>13</sup>C NMR spectrum (100 MHz, C<sub>6</sub>D<sub>6</sub>) of compound **11f**.

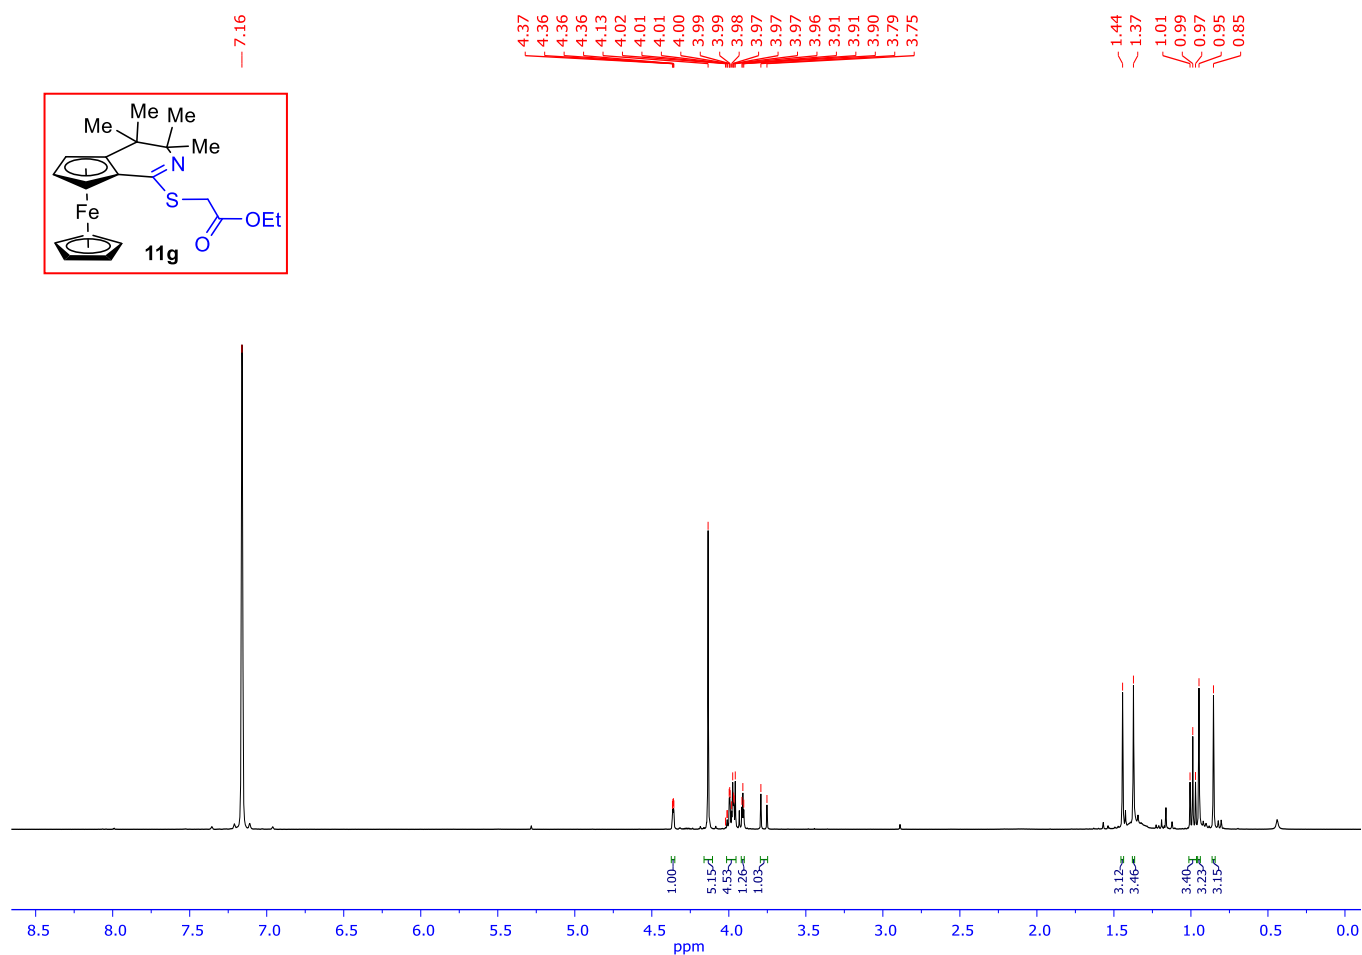

**Figure S75.** <sup>1</sup>H NMR spectrum (400 MHz, C<sub>6</sub>D<sub>6</sub>) of compound **11g**.

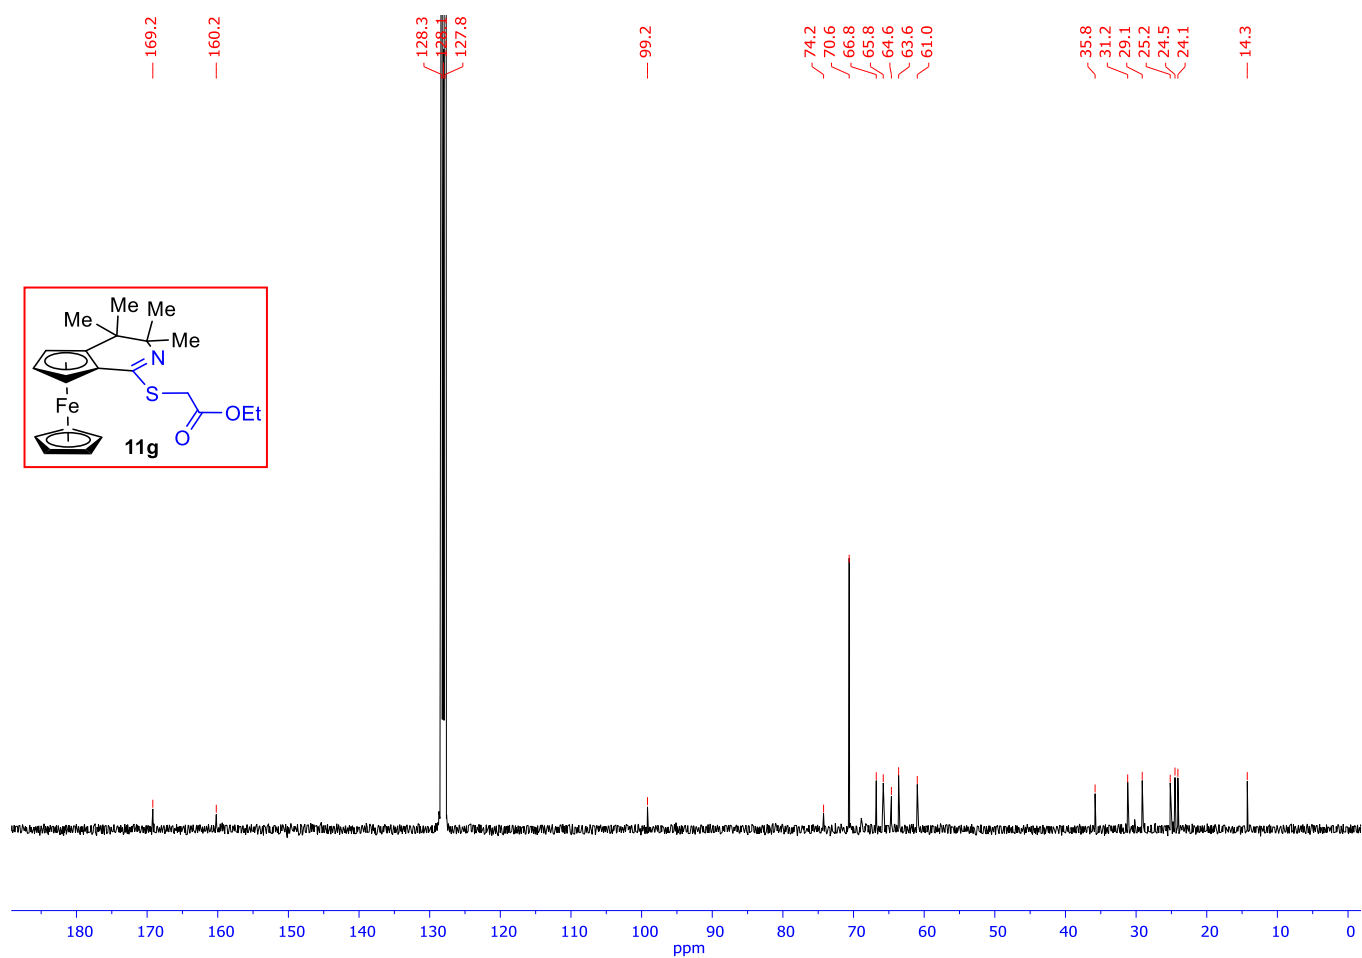

**Figure S76.** <sup>13</sup>C NMR spectrum (100 MHz, C<sub>6</sub>D<sub>6</sub>) of compound **11g**.

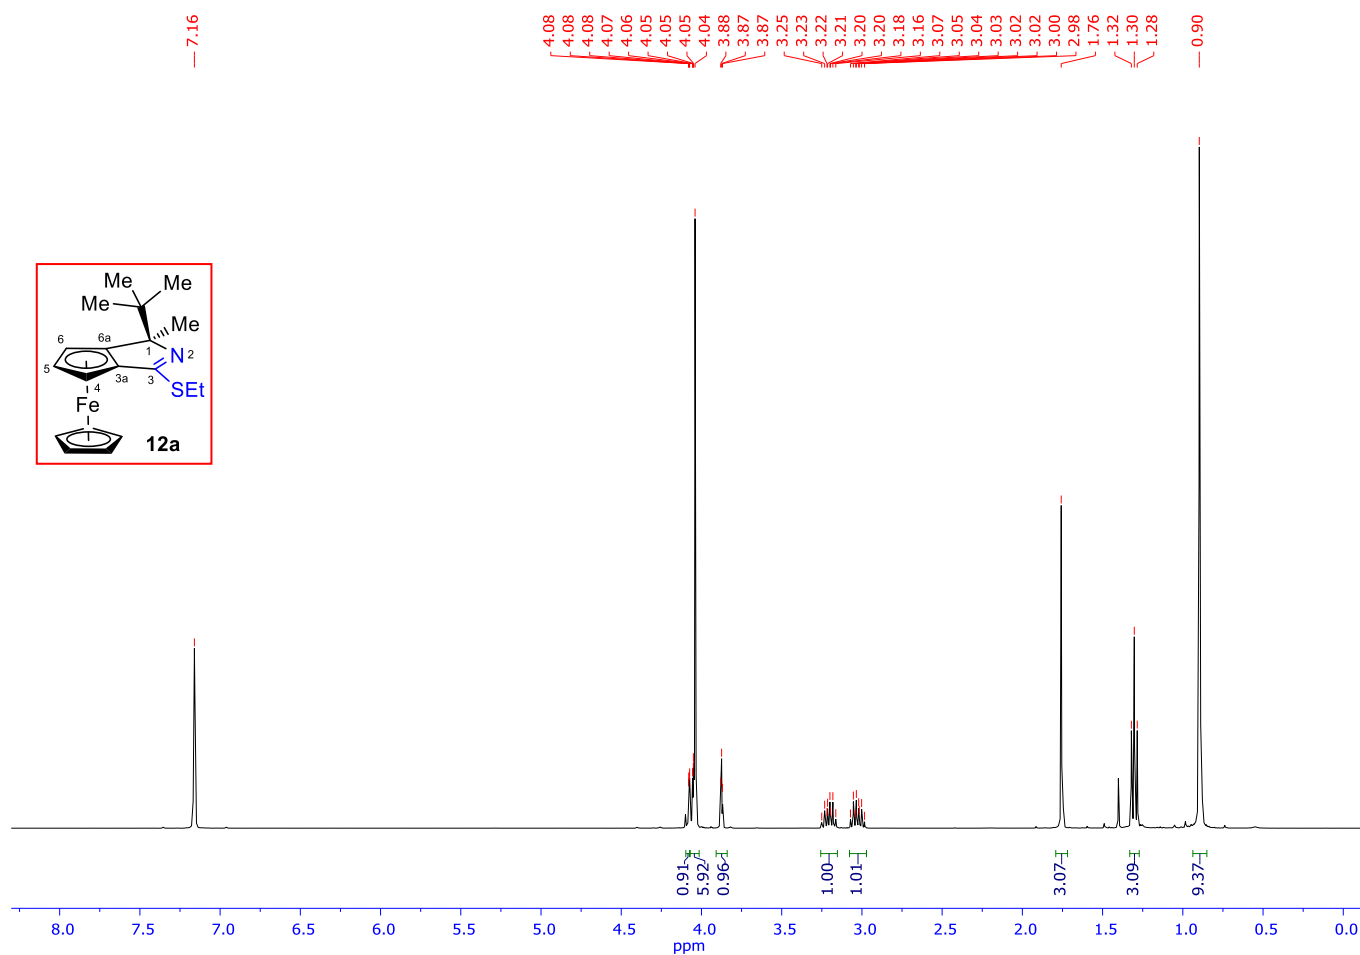

**Figure S77.** <sup>1</sup>H NMR spectrum (400 MHz, C<sub>6</sub>D<sub>6</sub>) of compound **12a**.

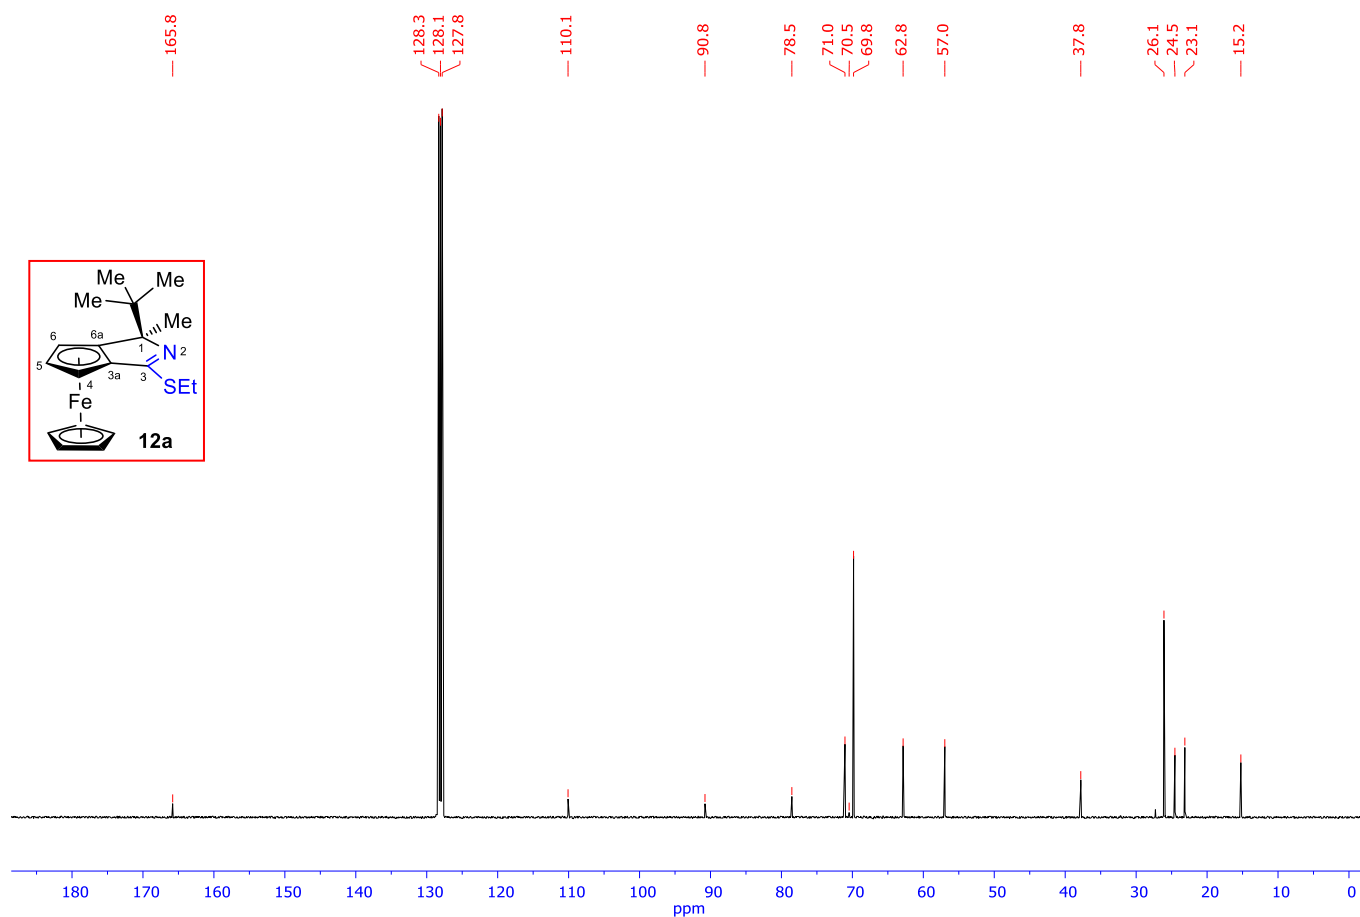

**Figure S78.** <sup>13</sup>C NMR spectrum (100 MHz, C<sub>6</sub>D<sub>6</sub>) of compound **12a**.

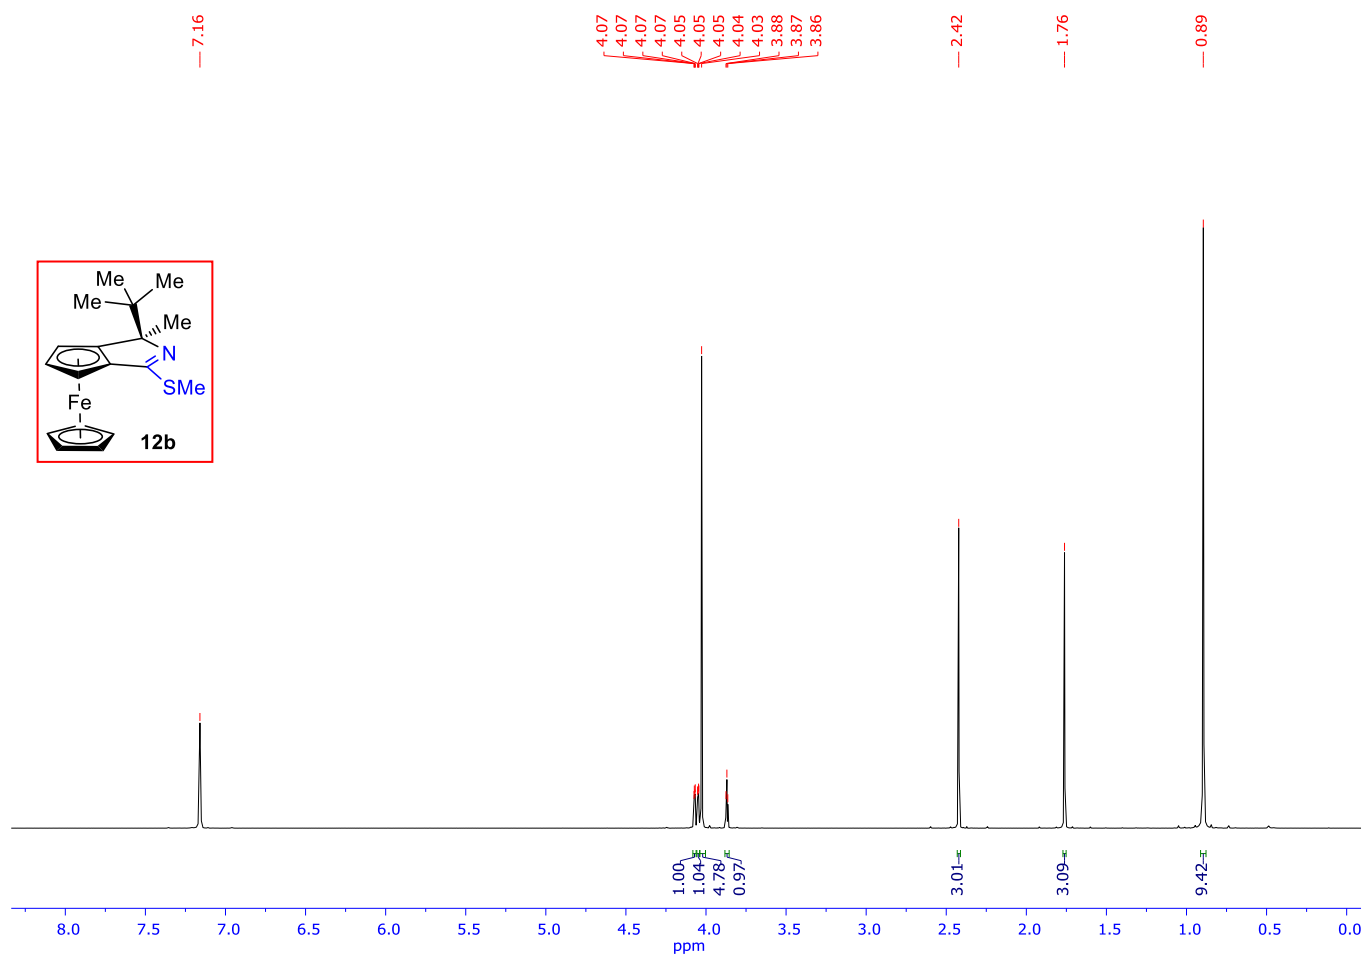

**Figure S79.** <sup>1</sup>H NMR spectrum (400 MHz, C<sub>6</sub>D<sub>6</sub>) of compound **12b**.

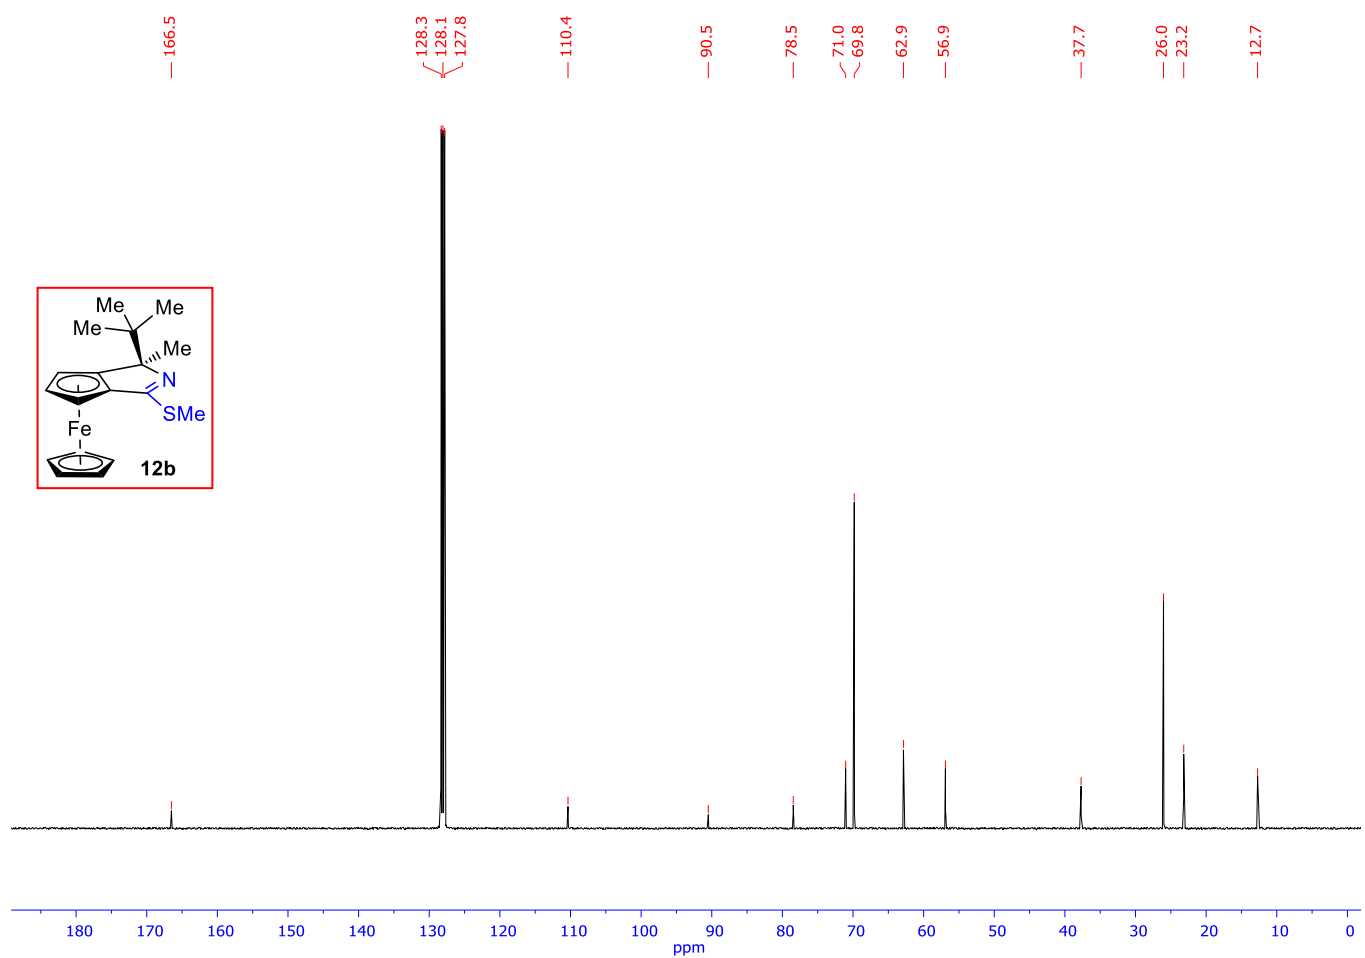

**Figure S80.** <sup>13</sup>C NMR spectrum (100 MHz, C<sub>6</sub>D<sub>6</sub>) of compound **12b**.



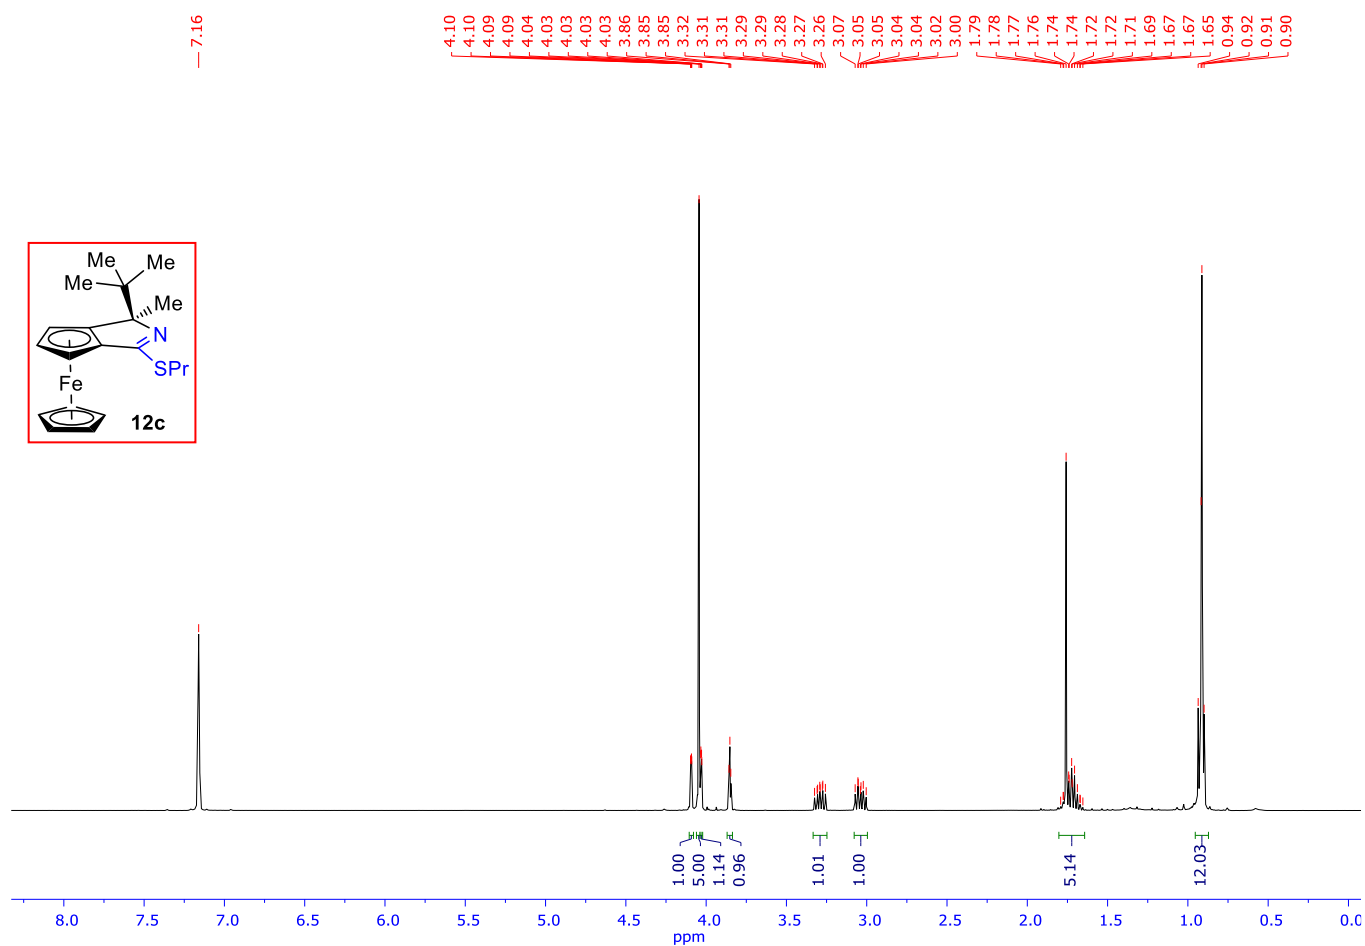

**Figure S81.** <sup>1</sup>H NMR spectrum (400 MHz, C<sub>6</sub>D<sub>6</sub>) of compound **12c**.

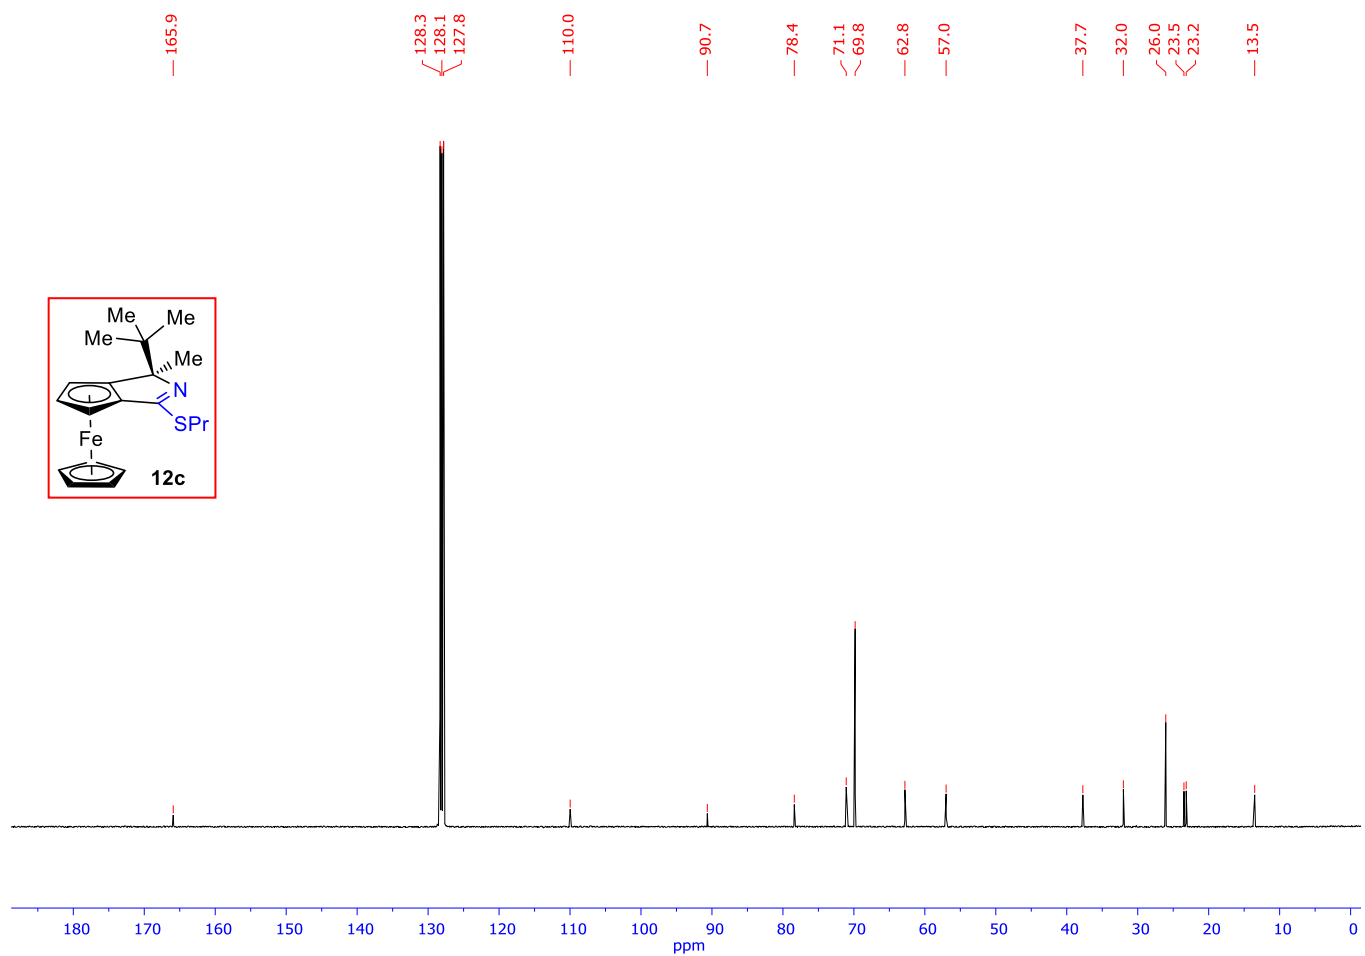

**Figure S82.** <sup>13</sup>C NMR spectrum (100 MHz, C<sub>6</sub>D<sub>6</sub>) of compound **12c**.

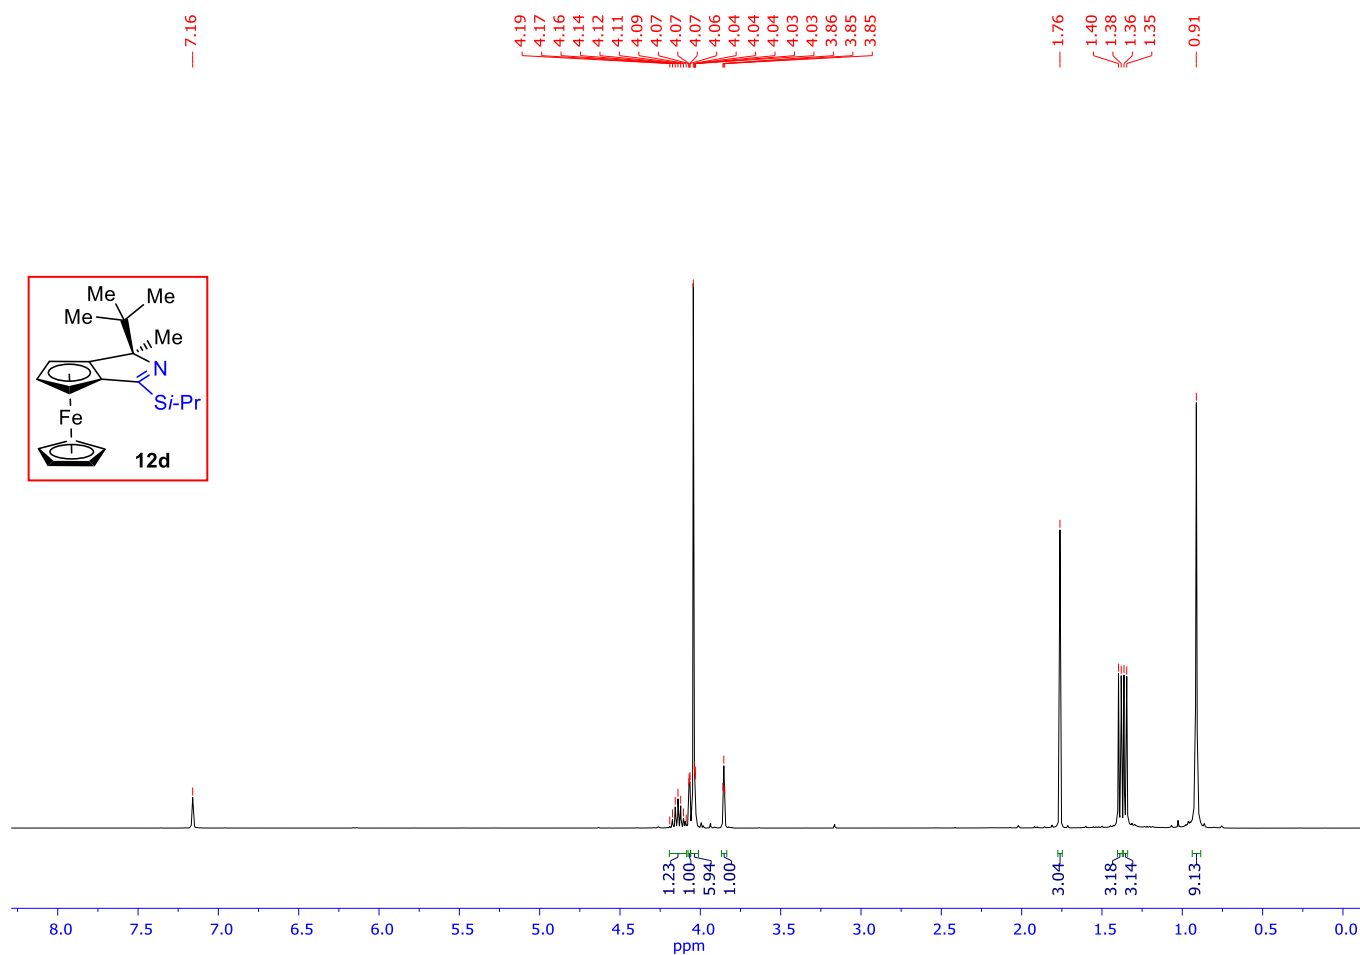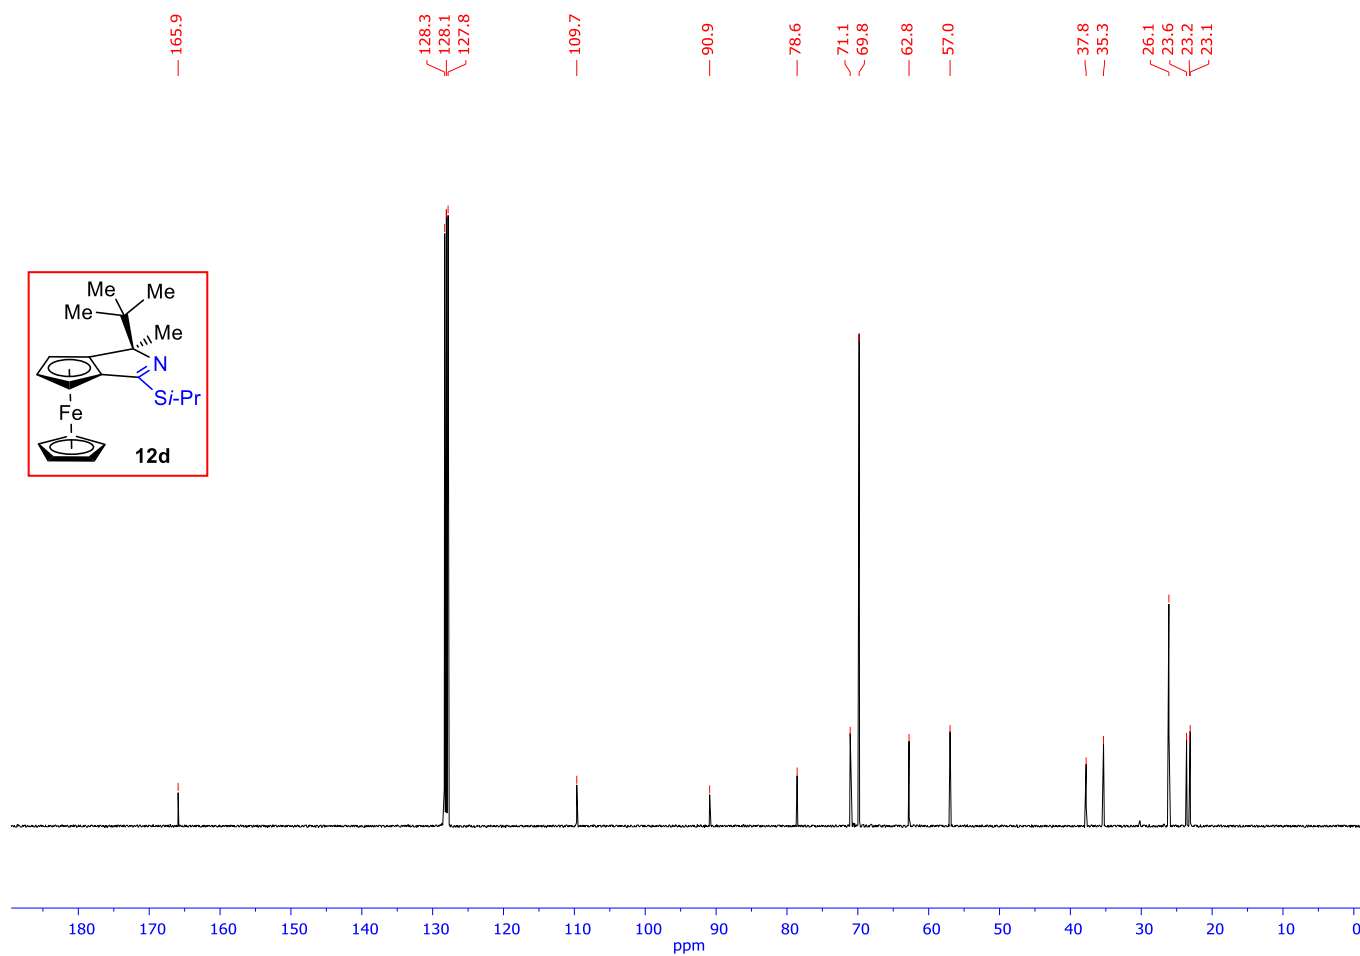

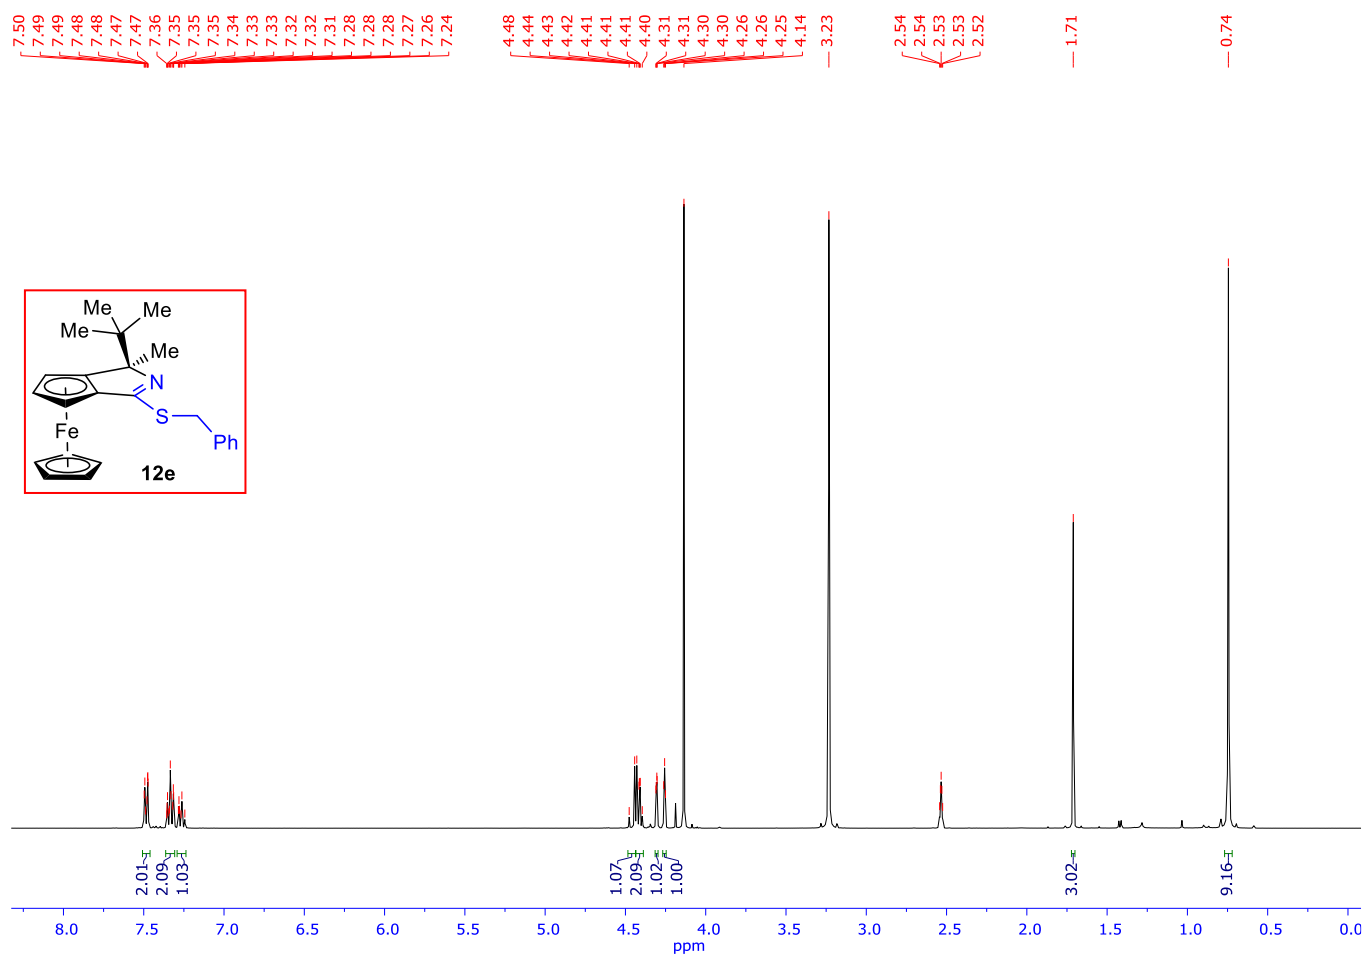

**Figure S85.** <sup>1</sup>H NMR spectrum (400 MHz, DMSO-*d*<sub>6</sub>) of compound **12e**.

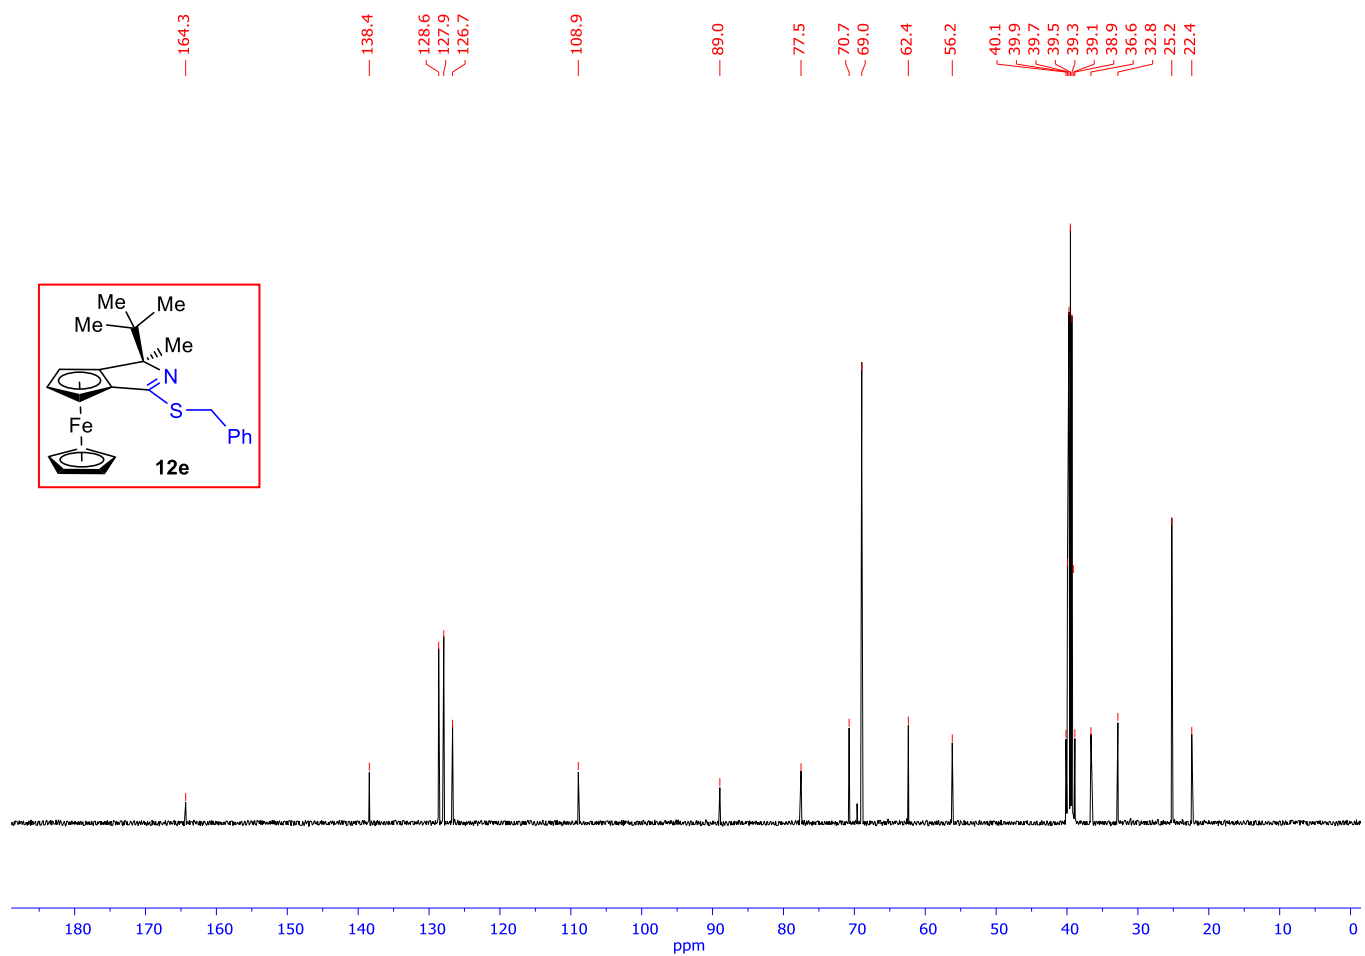

**Figure S86.** <sup>13</sup>C NMR spectrum (100 MHz, DMSO-*d*<sub>6</sub>) of compound **12e**.

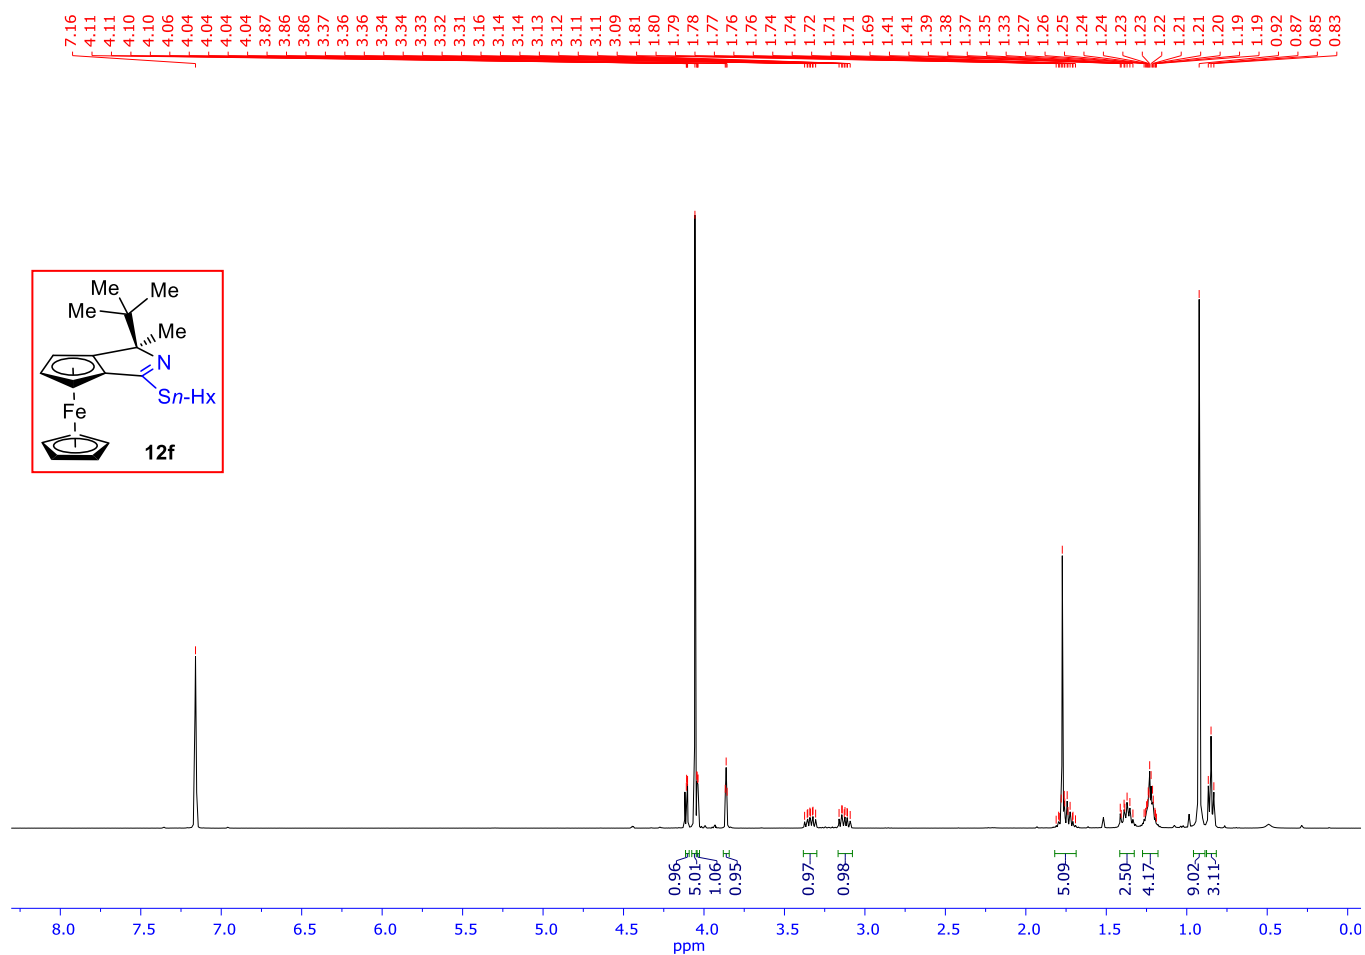

**Figure S87.** <sup>1</sup>H NMR spectrum (400 MHz, C<sub>6</sub>D<sub>6</sub>) of compound **12f**.

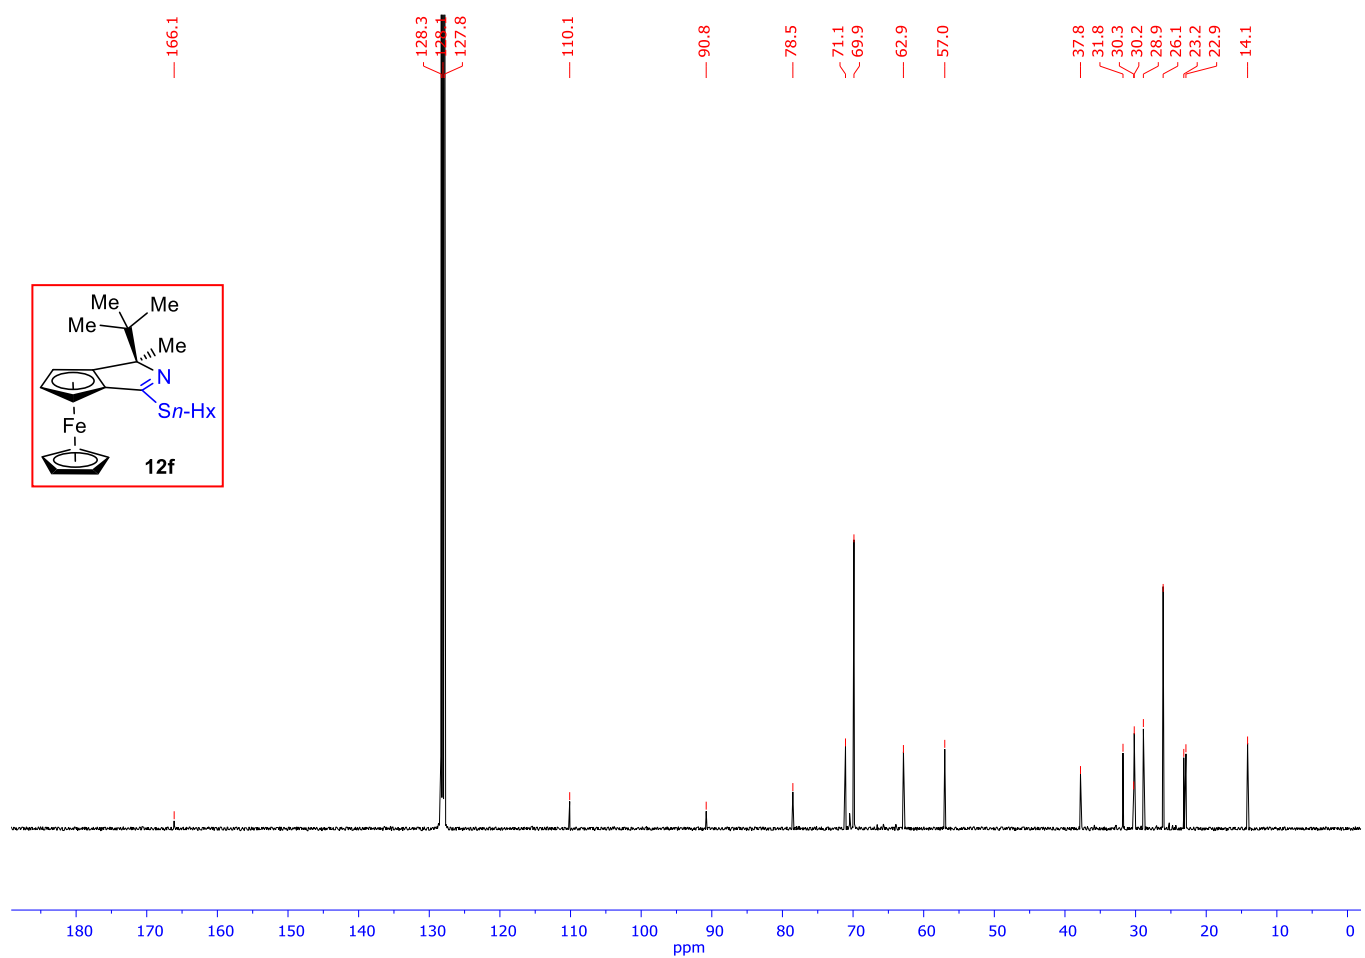

**Figure S89.** <sup>13</sup>C NMR spectrum (100 MHz, C<sub>6</sub>D<sub>6</sub>) of compound **12f**.

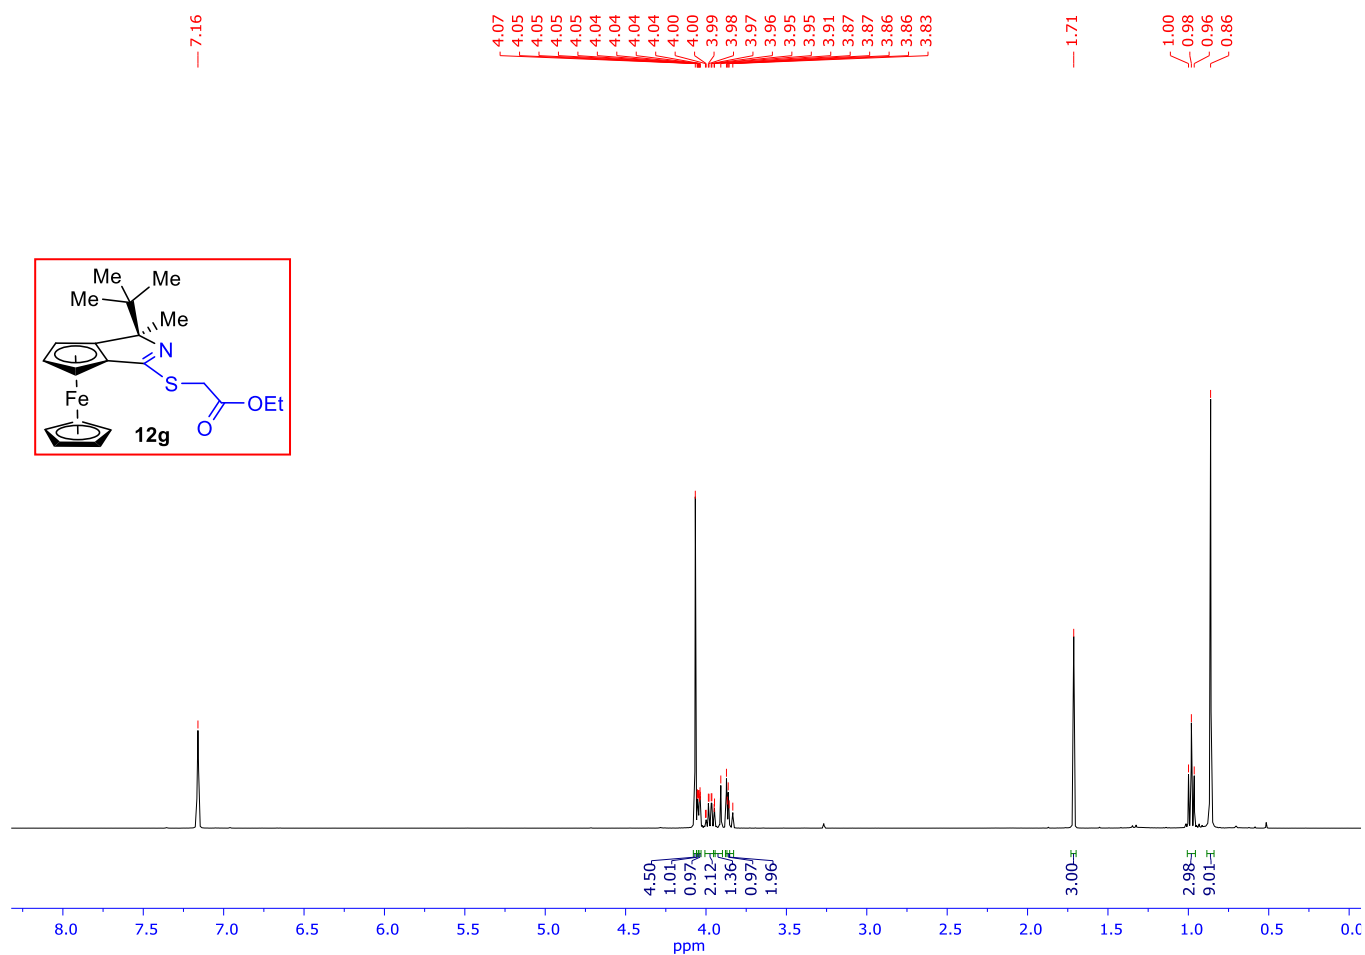

**Figure S90.** <sup>1</sup>H NMR spectrum (400 MHz, C<sub>6</sub>D<sub>6</sub>) of compound **12g**.

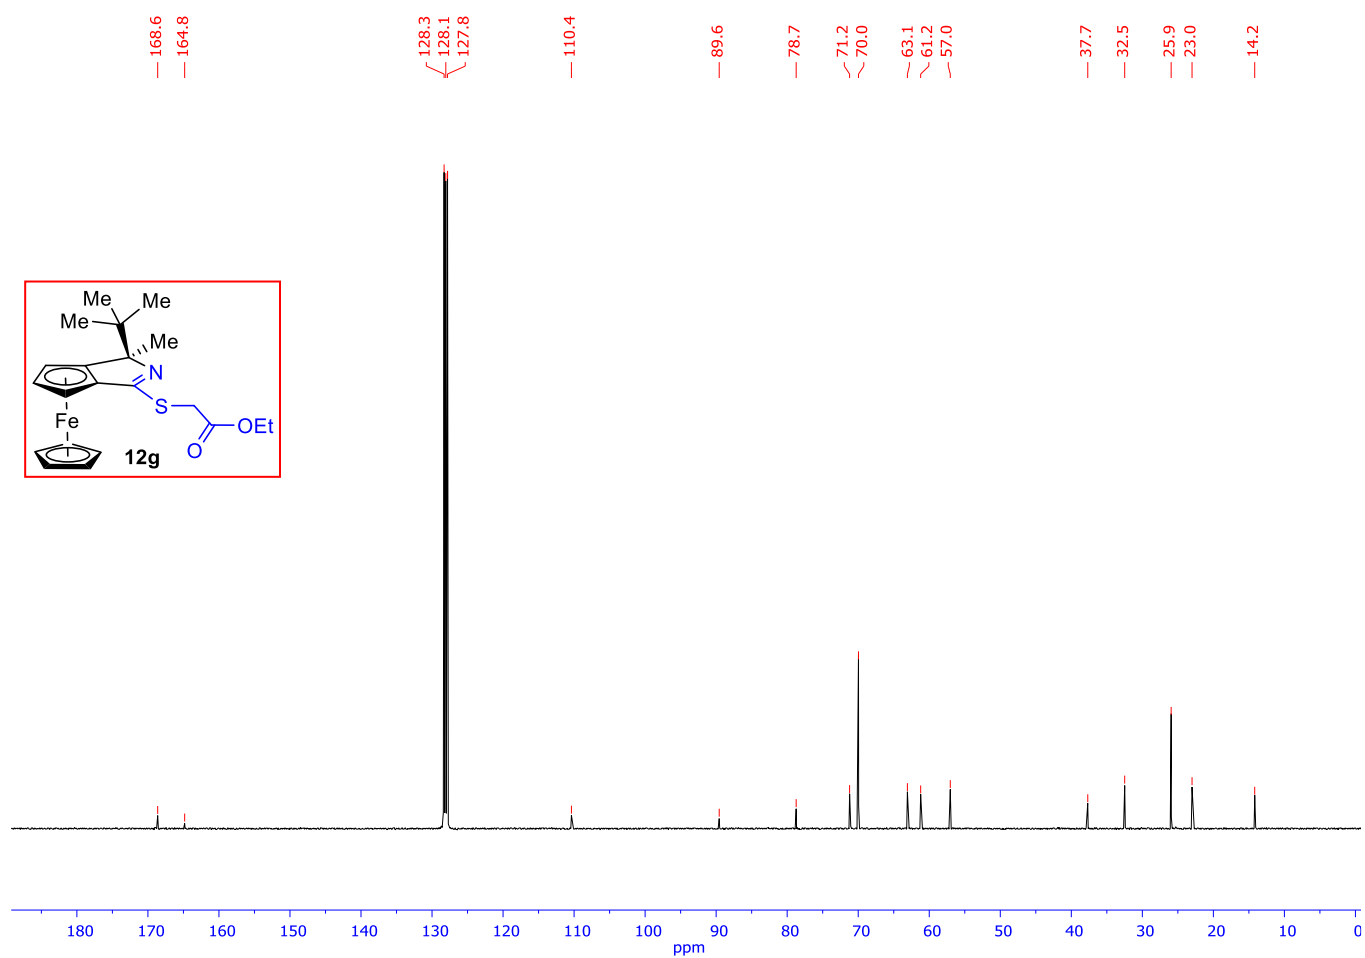

**Figure S91.** <sup>13</sup>C NMR spectrum (100 MHz, C<sub>6</sub>D<sub>6</sub>) of compound **12g**.

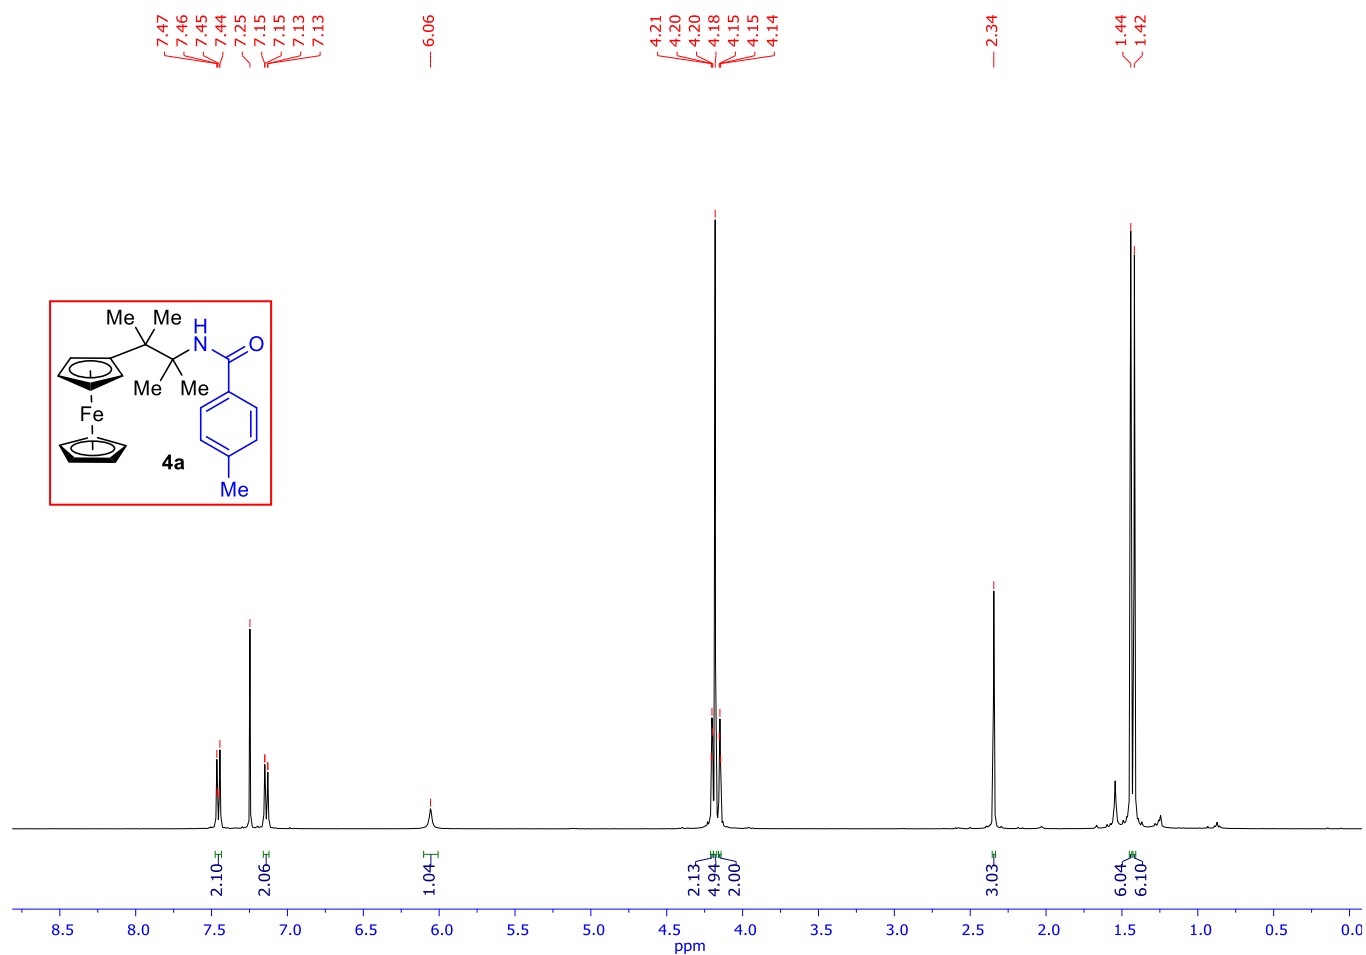

**Figure S92.** <sup>1</sup>H NMR spectrum (400 MHz, CDCl<sub>3</sub>) of compound **4a**.

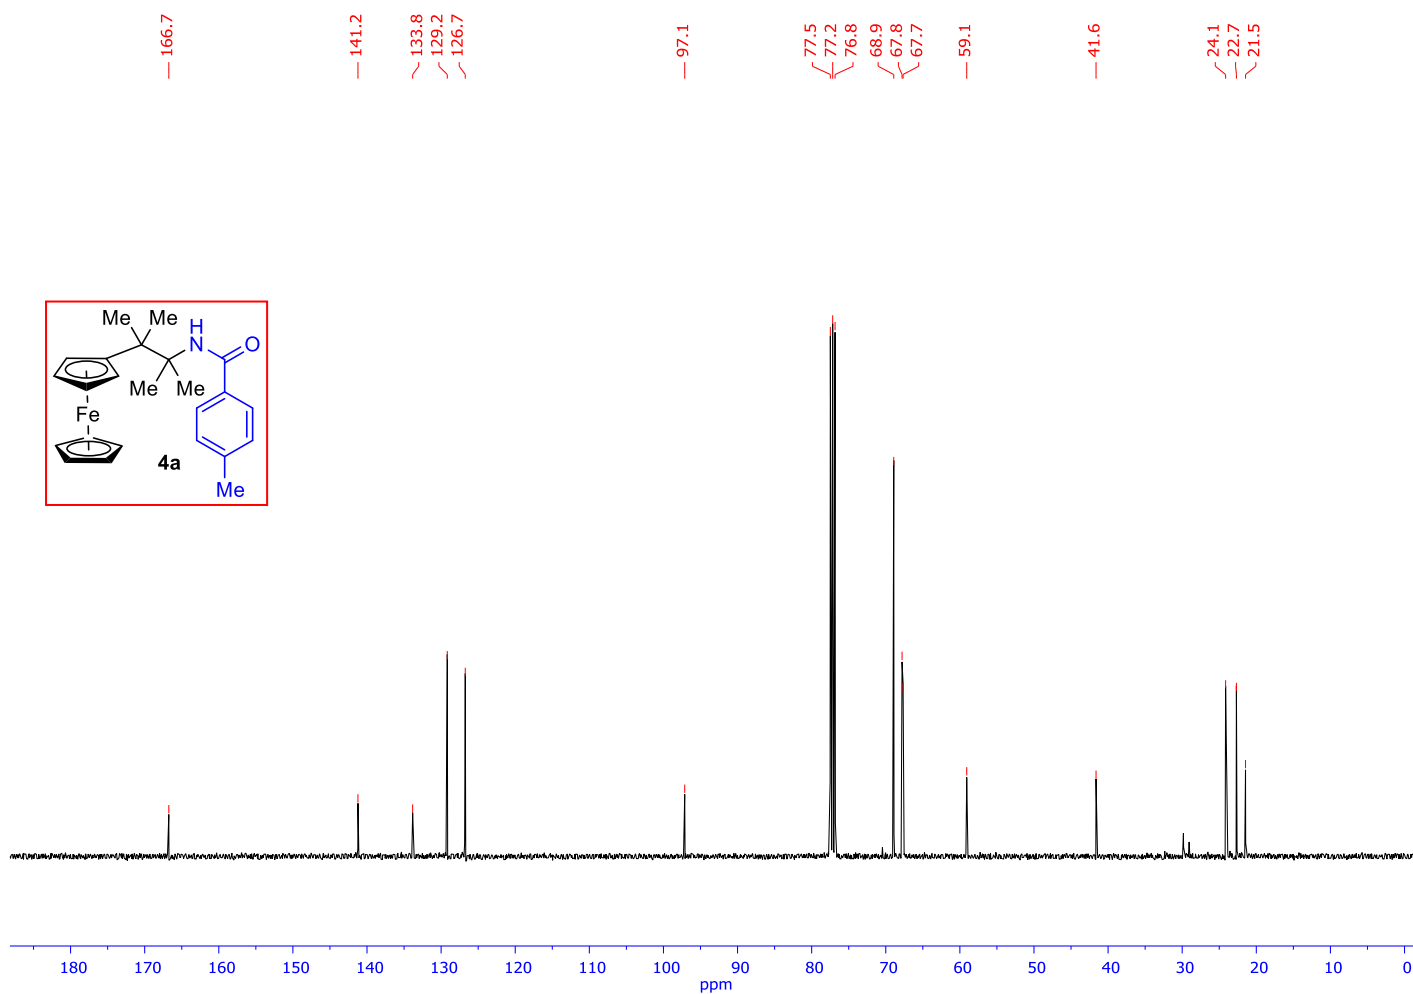

**Figure S93.** <sup>13</sup>C NMR spectrum (100 MHz, CDCl<sub>3</sub>) of compound **4a**.

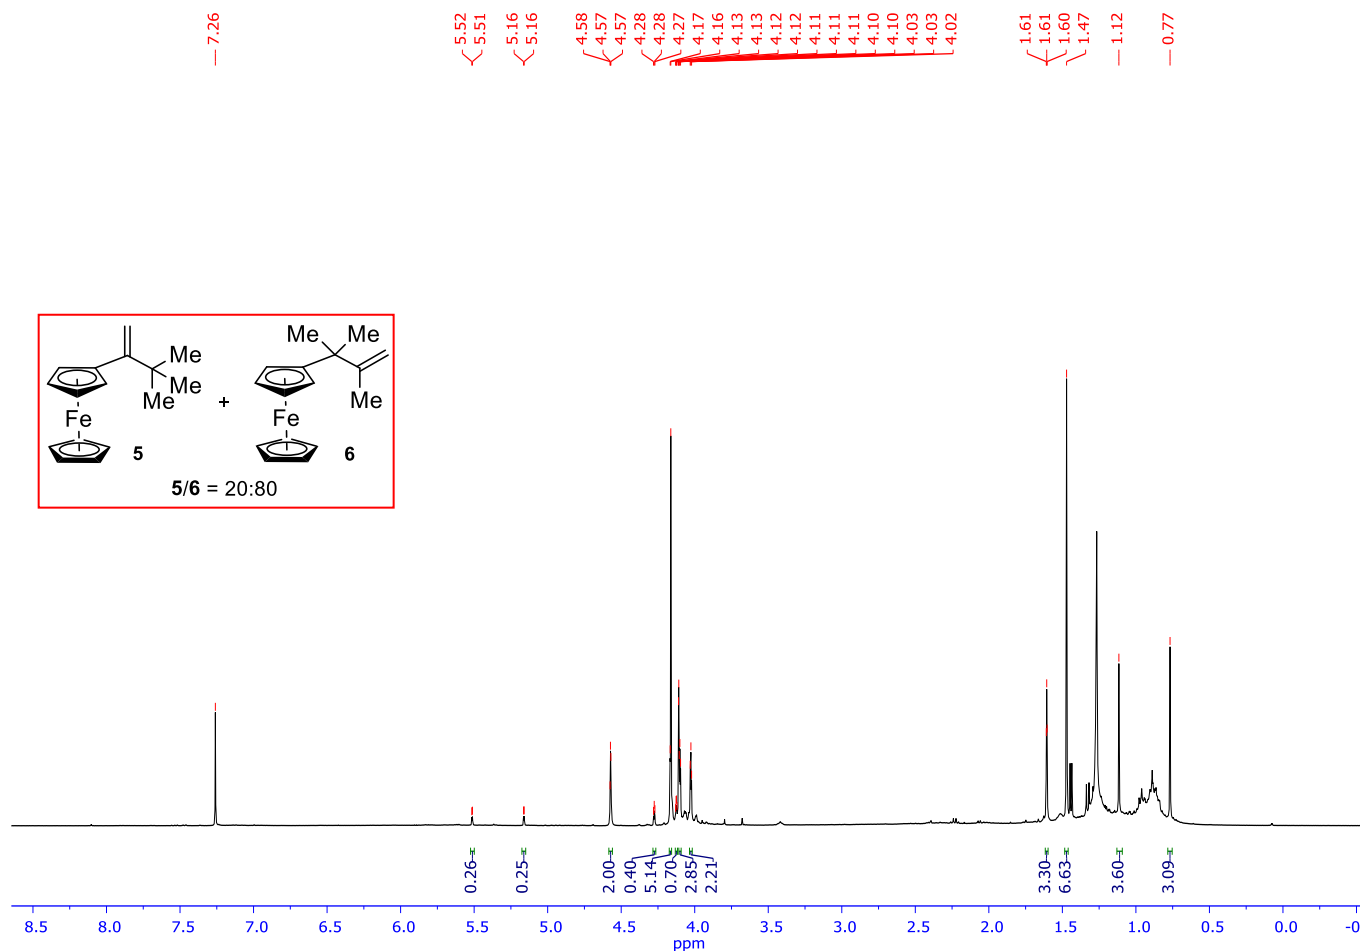

**Figure S94.** <sup>1</sup>H NMR spectrum (400 MHz, CDCl<sub>3</sub>) of mixture of compounds **5** and **6**.

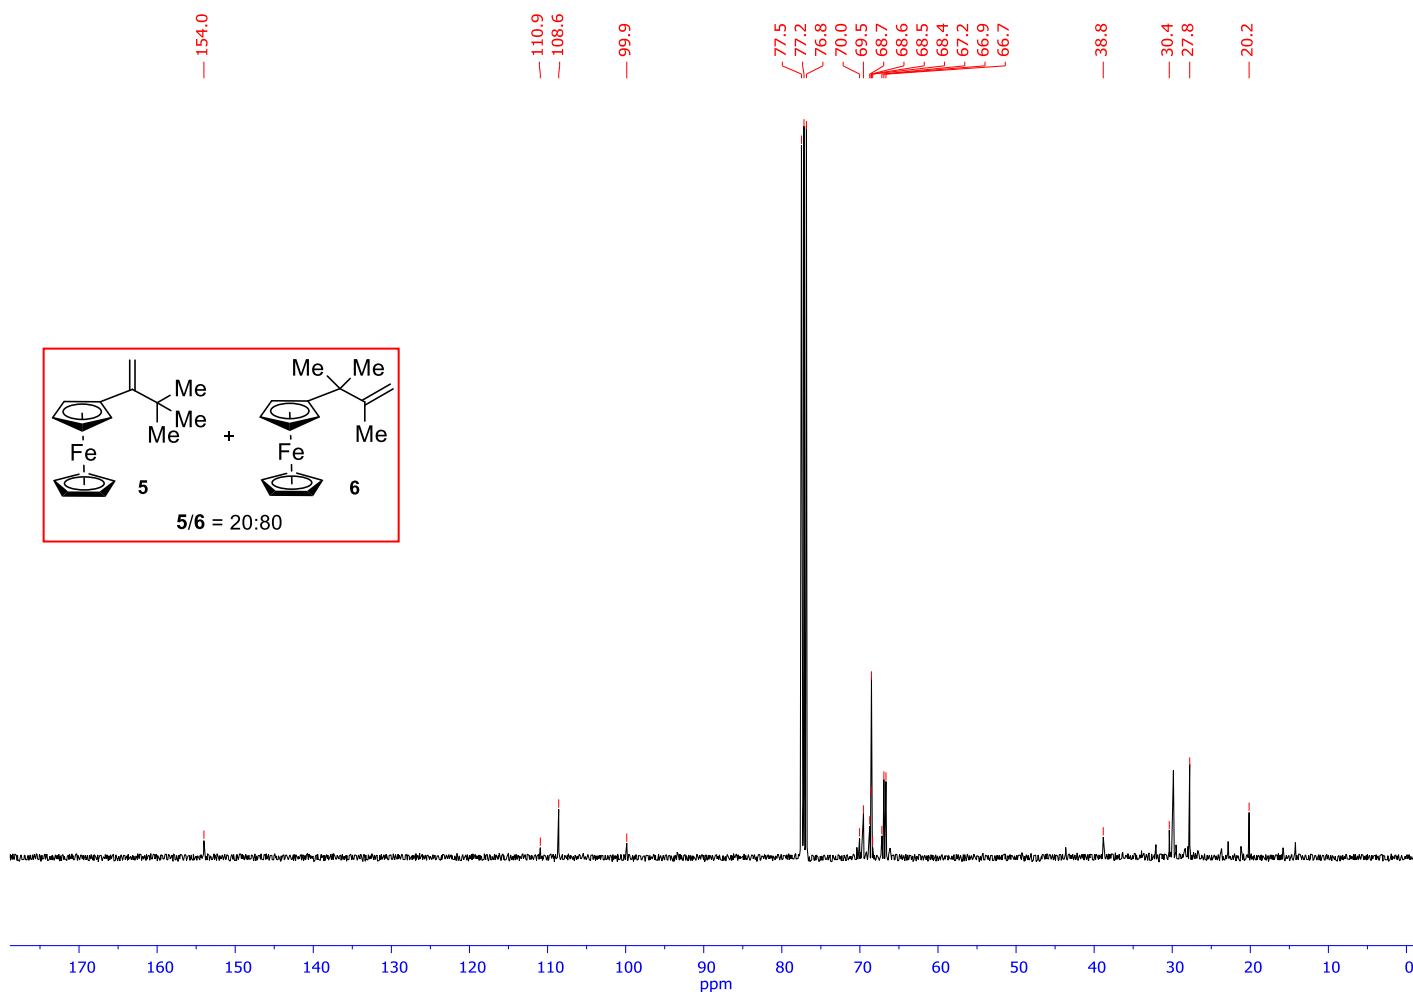

**Figure S95.** <sup>13</sup>C NMR spectrum (100 MHz, CDCl<sub>3</sub>) of mixture of compounds **5** and **6**.

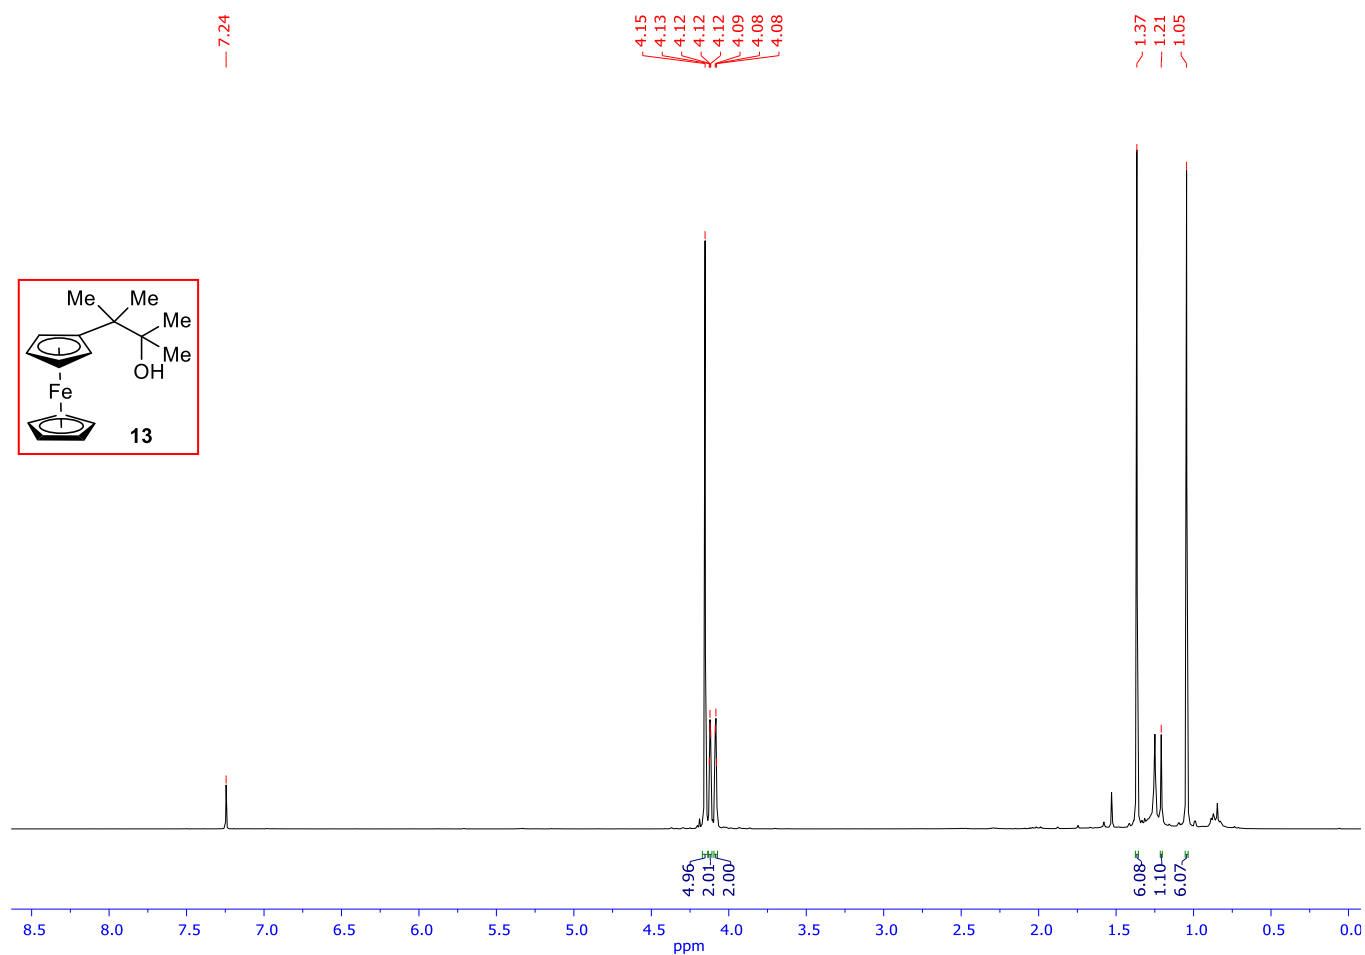

**Figure S96.** <sup>1</sup>H NMR spectrum (400 MHz, CDCl<sub>3</sub>) of compound **13**.

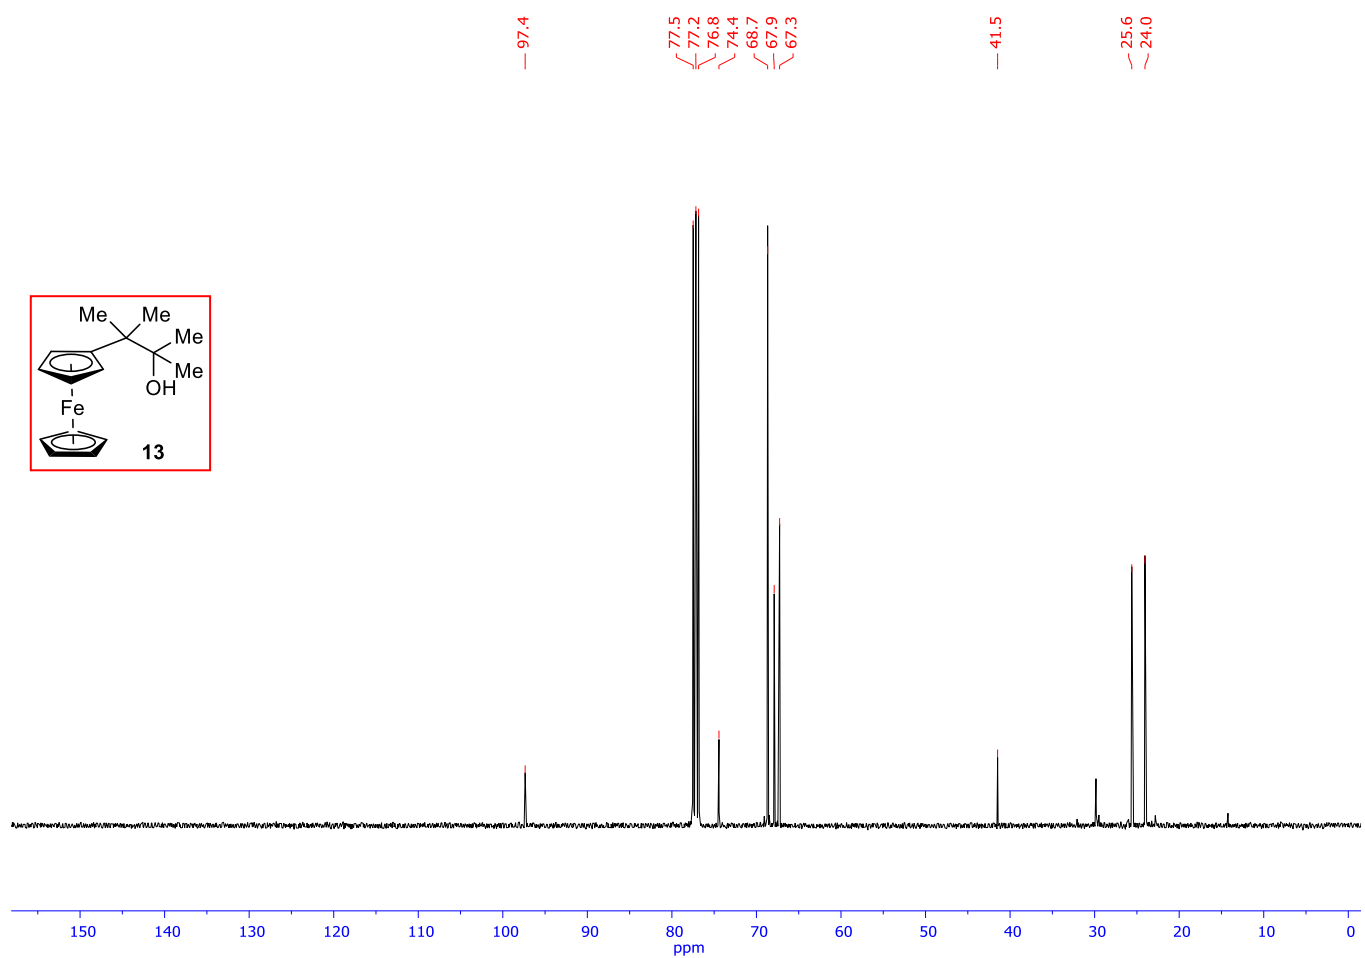

**Figure S97.** <sup>13</sup>C NMR spectrum (100 MHz, CDCl<sub>3</sub>) of compound **13**.



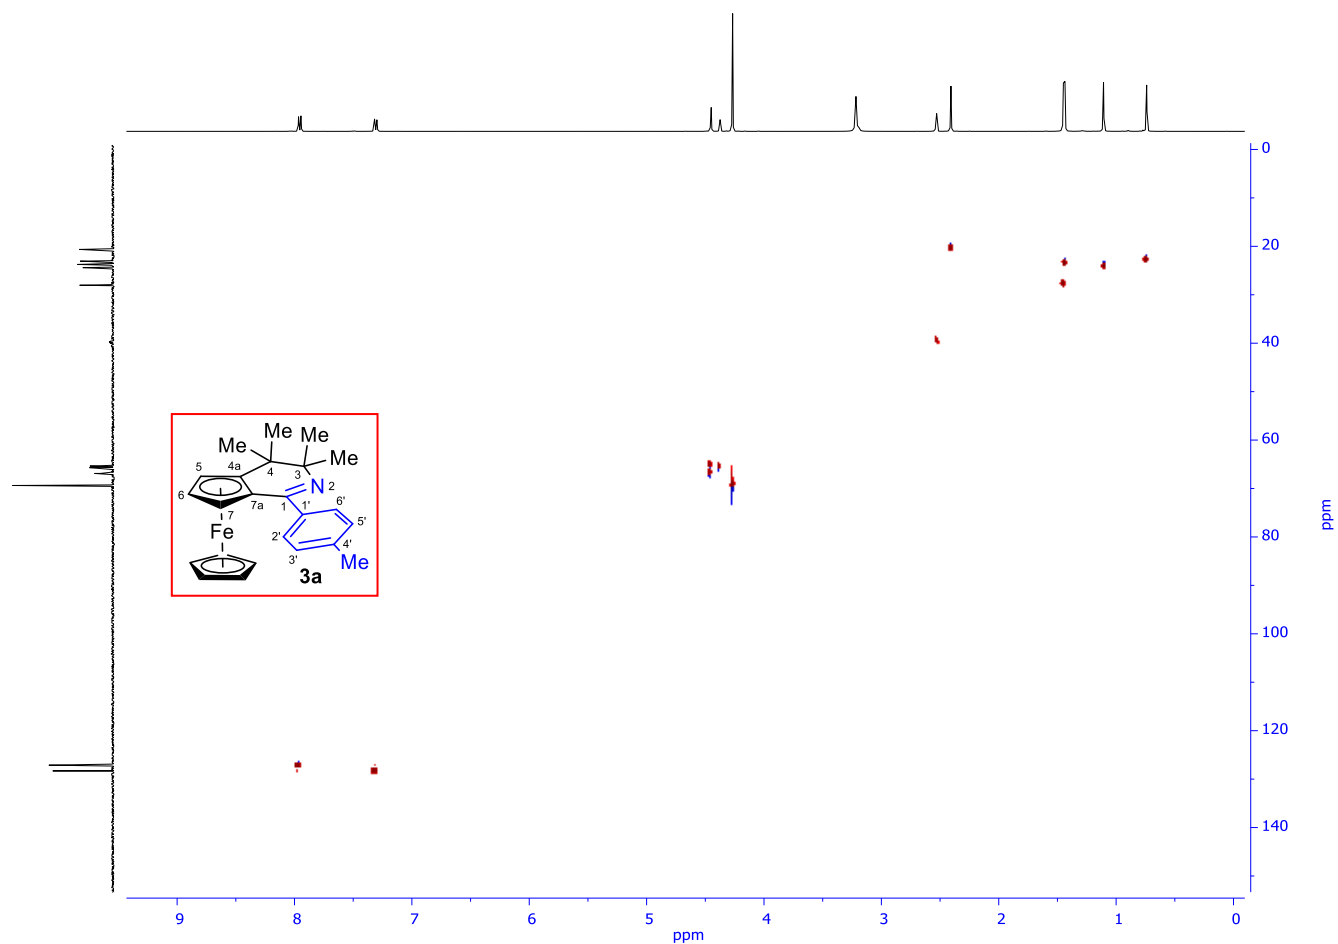

**Figure S98.** HSQC spectrum (400 MHz, DMSO- $d_6$ ) of compound **3a**.

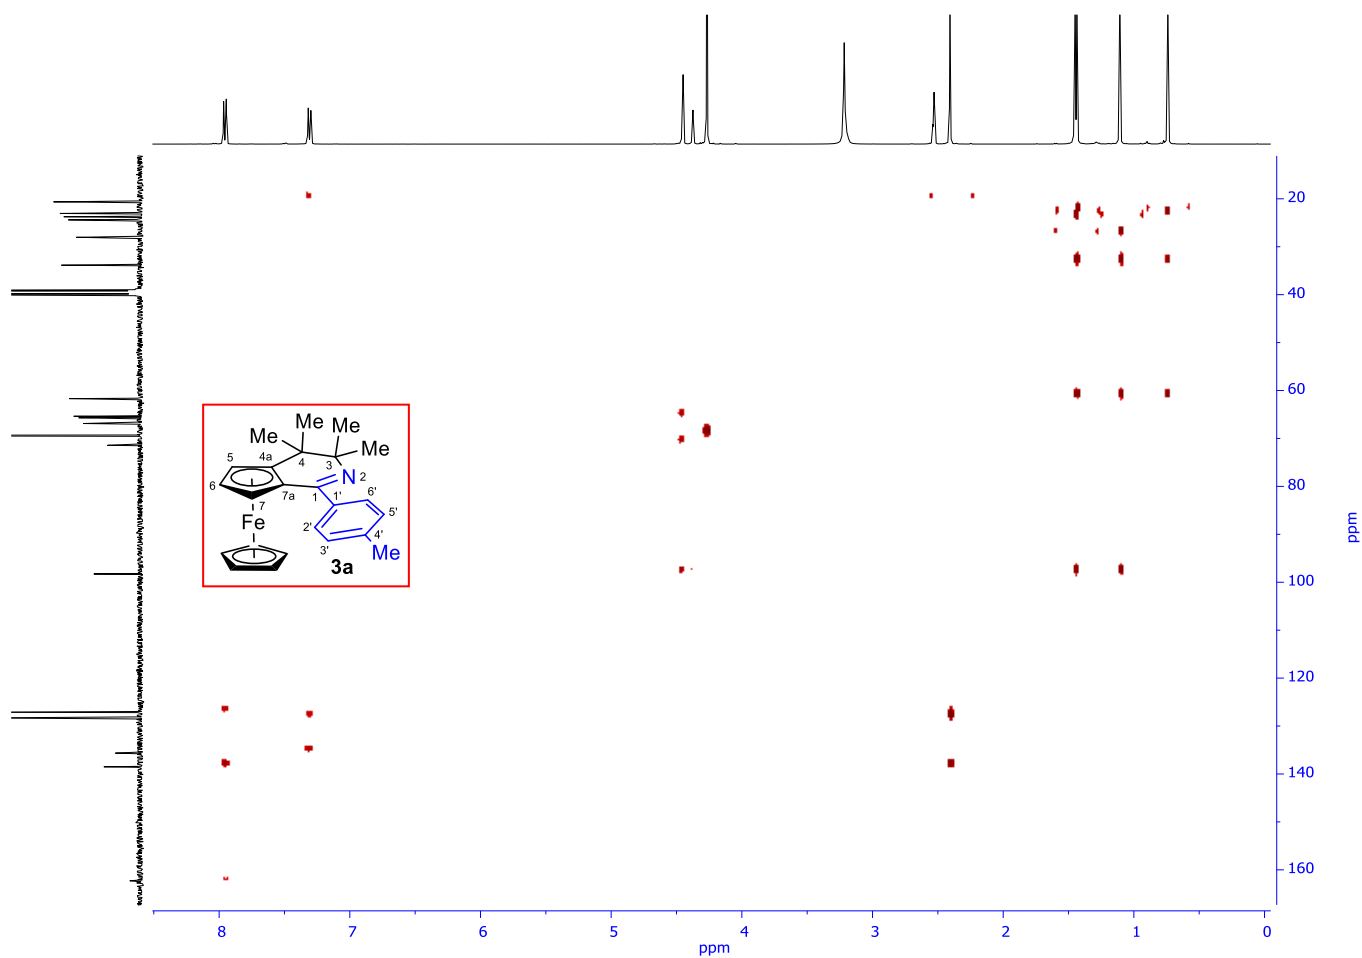

**Figure S99.** HMBC spectrum (400 MHz, DMSO- $d_6$ ) of compound **3a**.

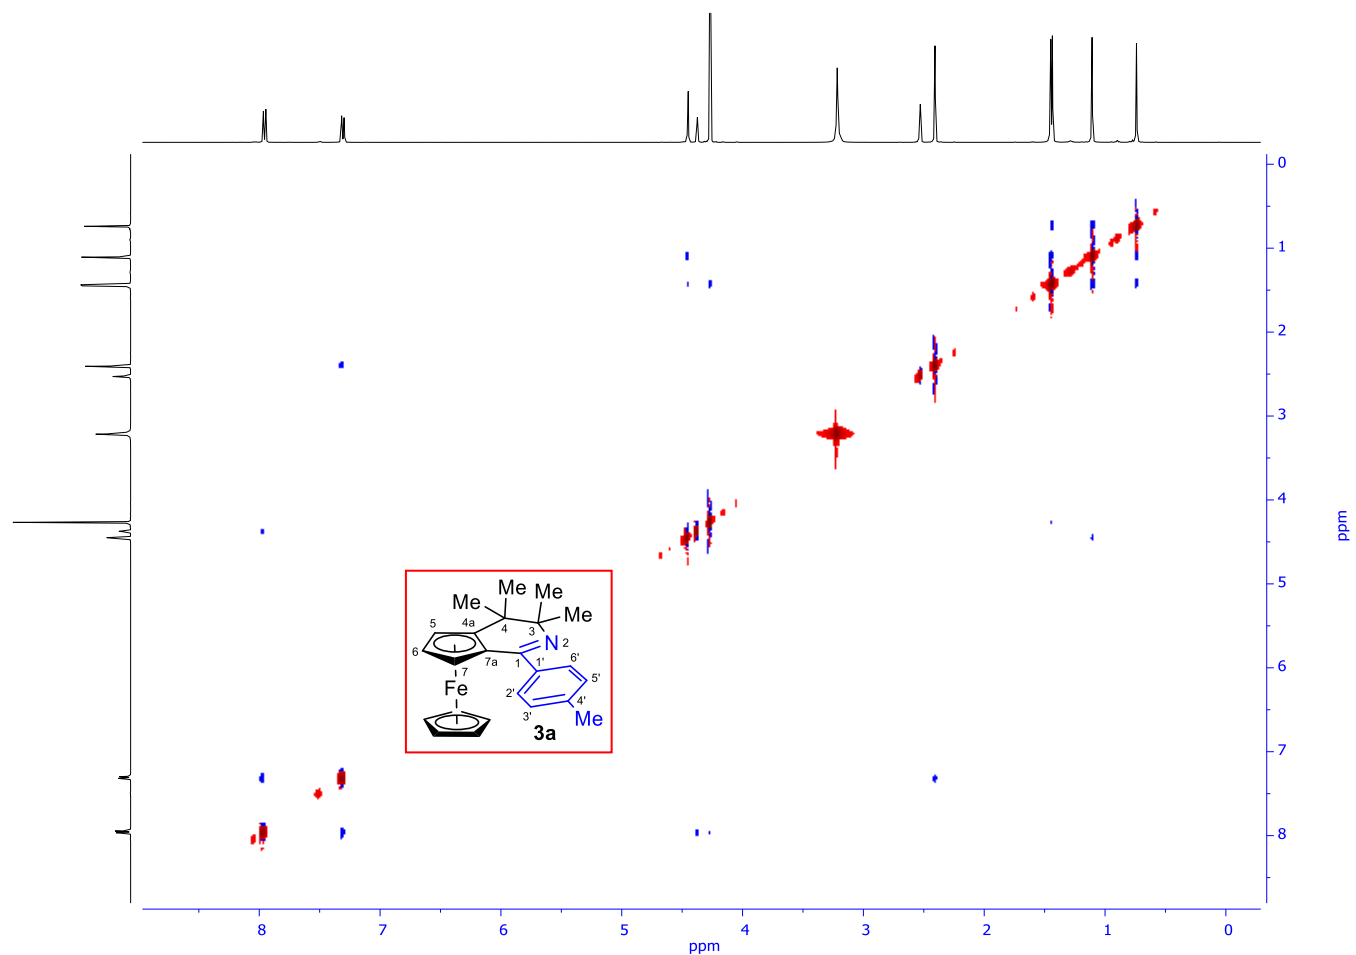

**Figure S100.** 2D NOESY spectrum (400 MHz, DMSO- $d_6$ ) of compound **3a**.

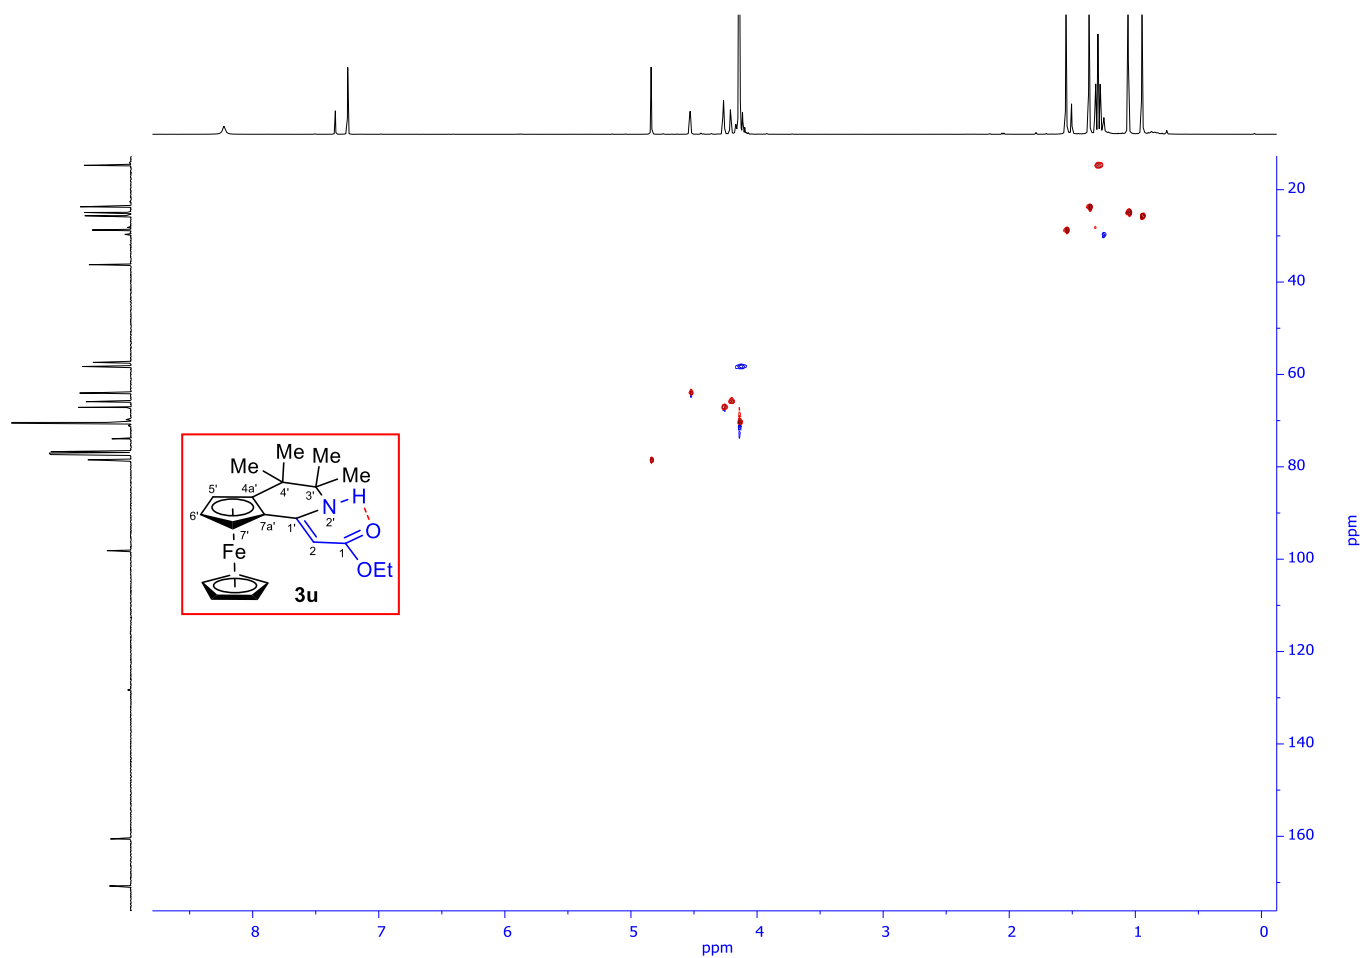

**Figure S101.** HSQC spectrum (400 MHz,  $\text{CDCl}_3$ ) of compound **3u**.

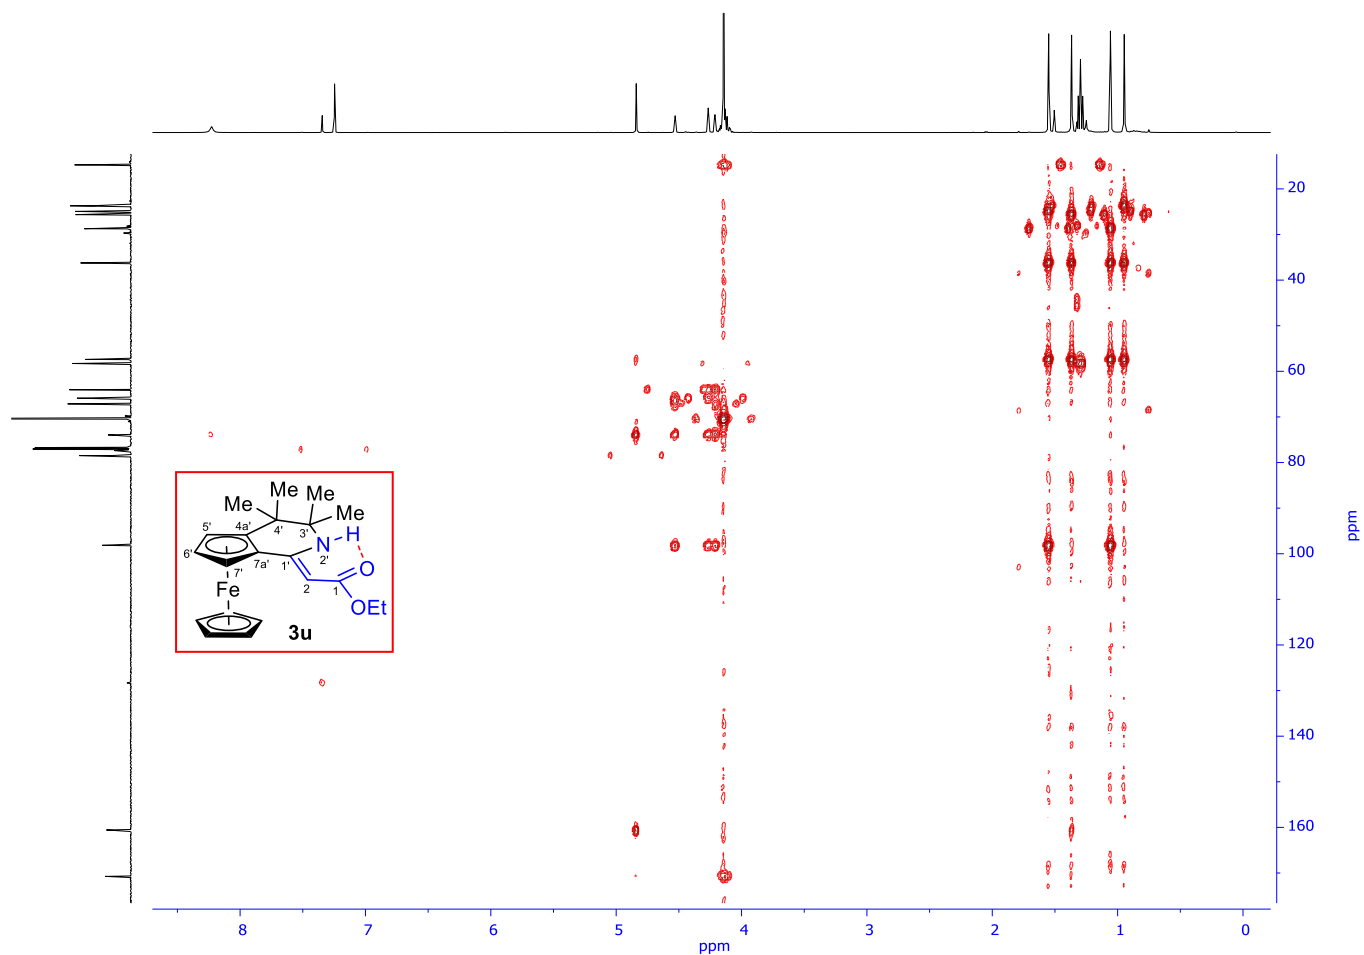

**Figure S102.** HMBC spectrum (400 MHz, CDCl<sub>3</sub>) of compound **3u**.

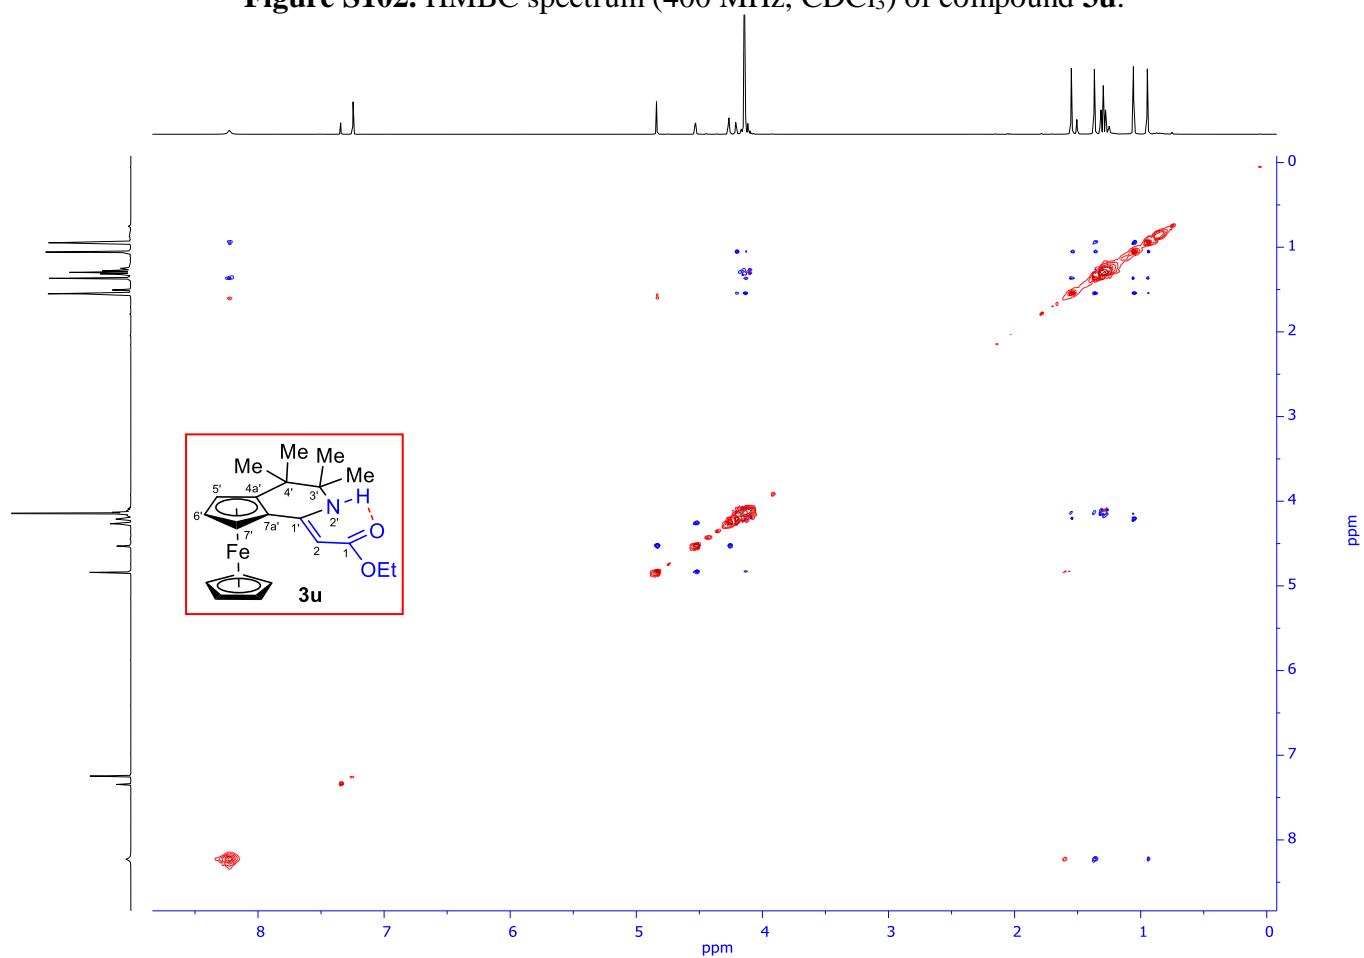

**Figure S103.** 2D NOESY spectrum (400 MHz, CDCl<sub>3</sub>) of compound **3u**.

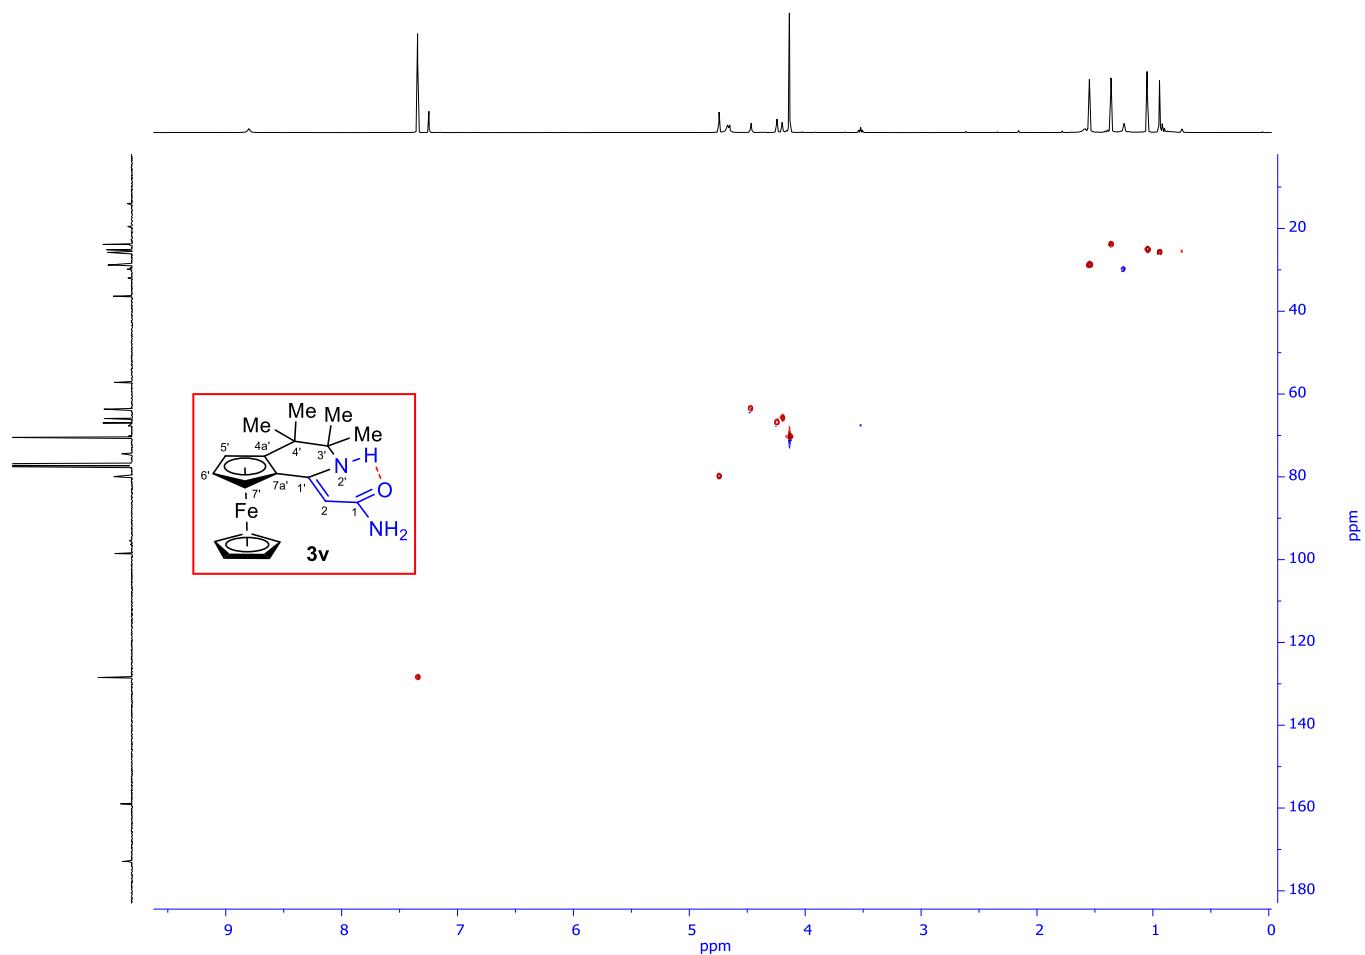

**Figure S104.** HSQC spectrum (400 MHz,  $\text{CDCl}_3$ ) of compound **3v**.

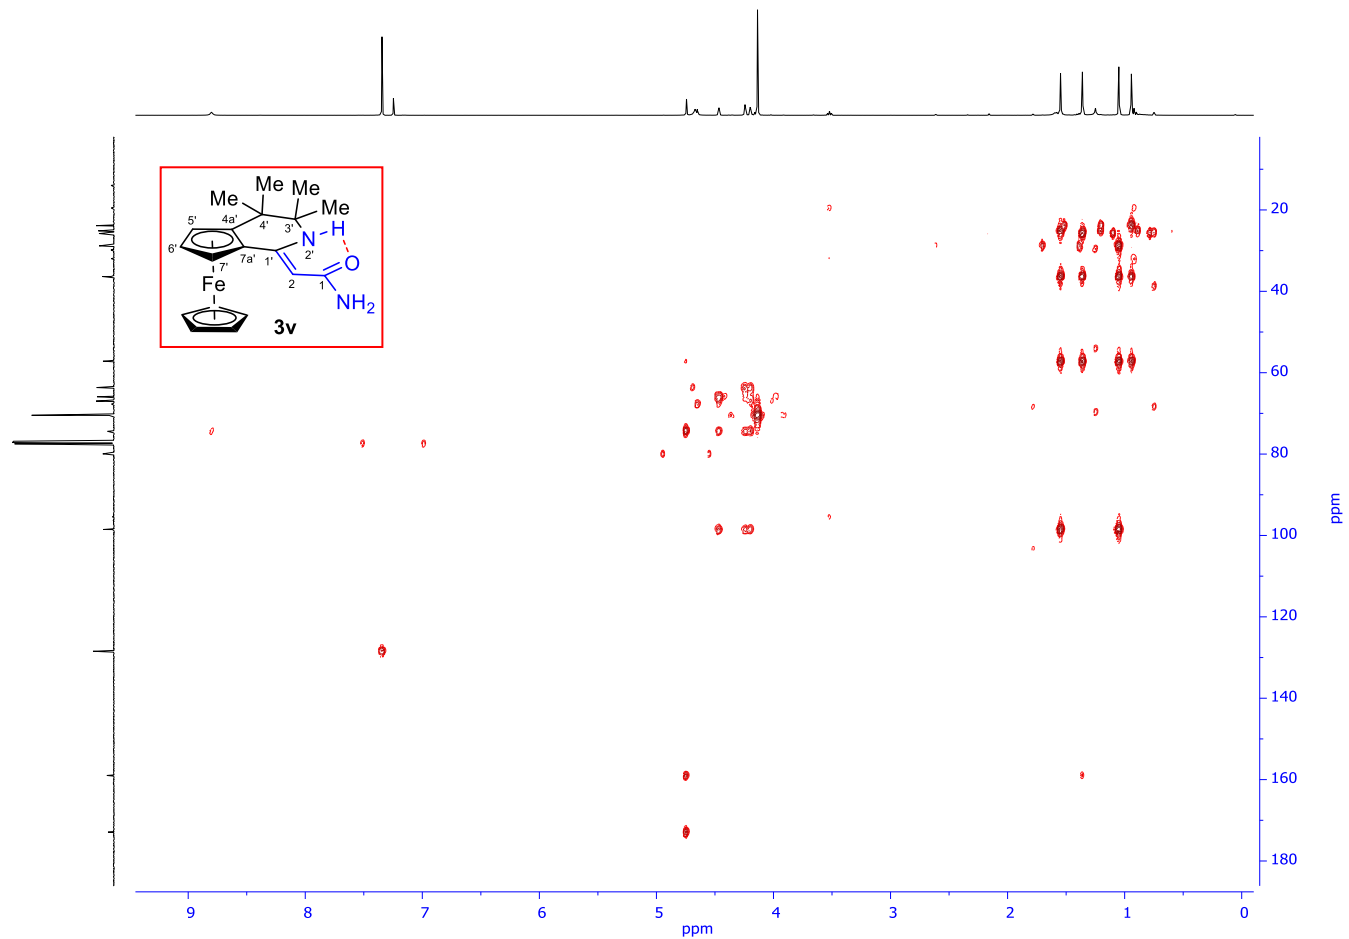

**Figure S105.** HMBC spectrum (100 MHz,  $\text{CDCl}_3$ ) of compound **3v**.

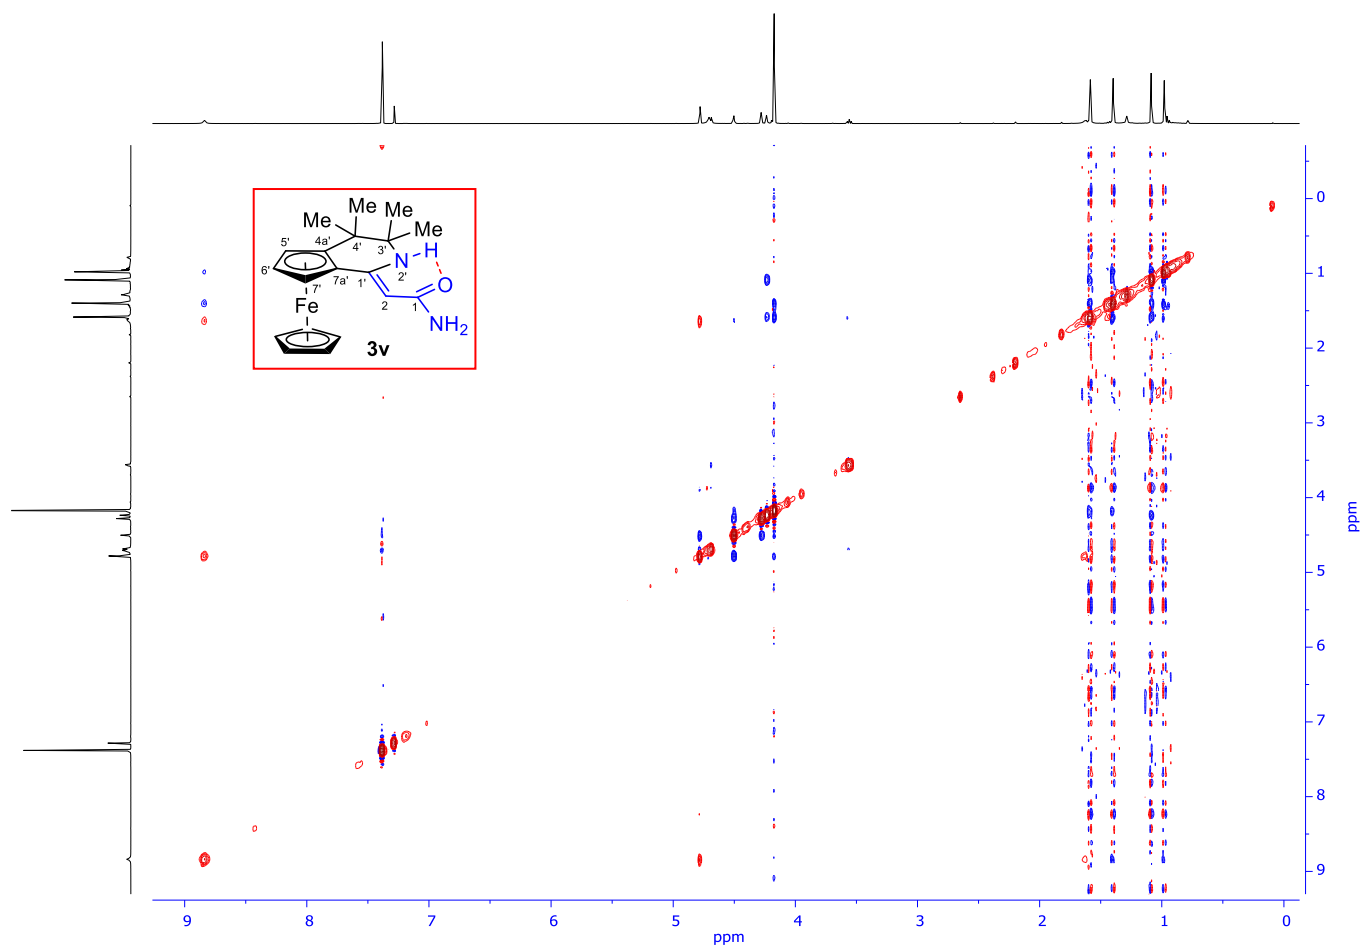

**Figure S106.** 2D NOESY spectrum (400 MHz,  $\text{CDCl}_3$ ) of compound **3v**.

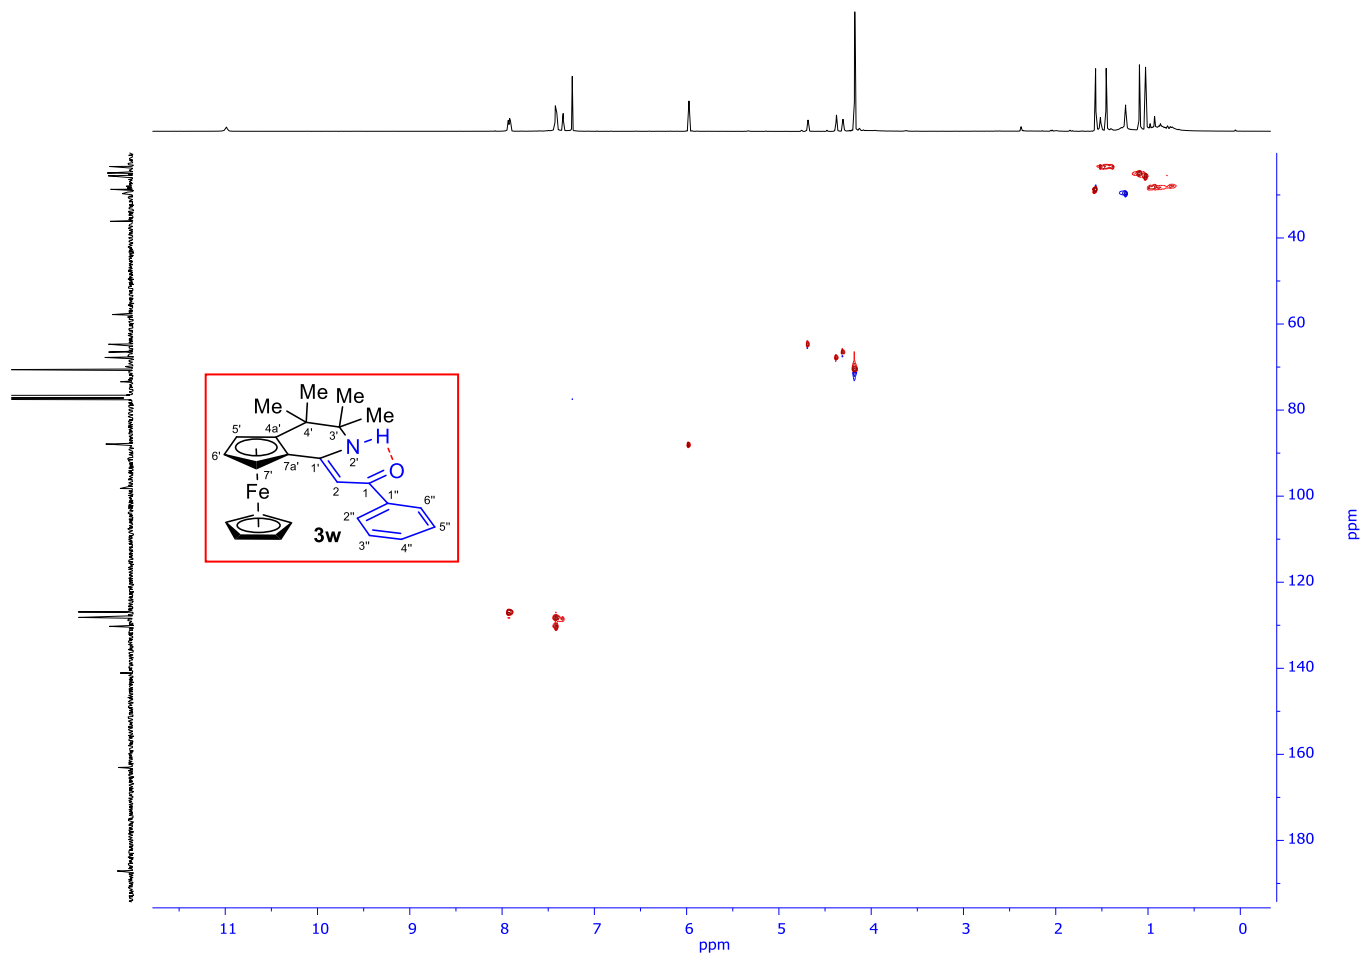

**Figure S107.** HSQC spectrum (400 MHz,  $\text{CDCl}_3$ ) of compound **3w**.

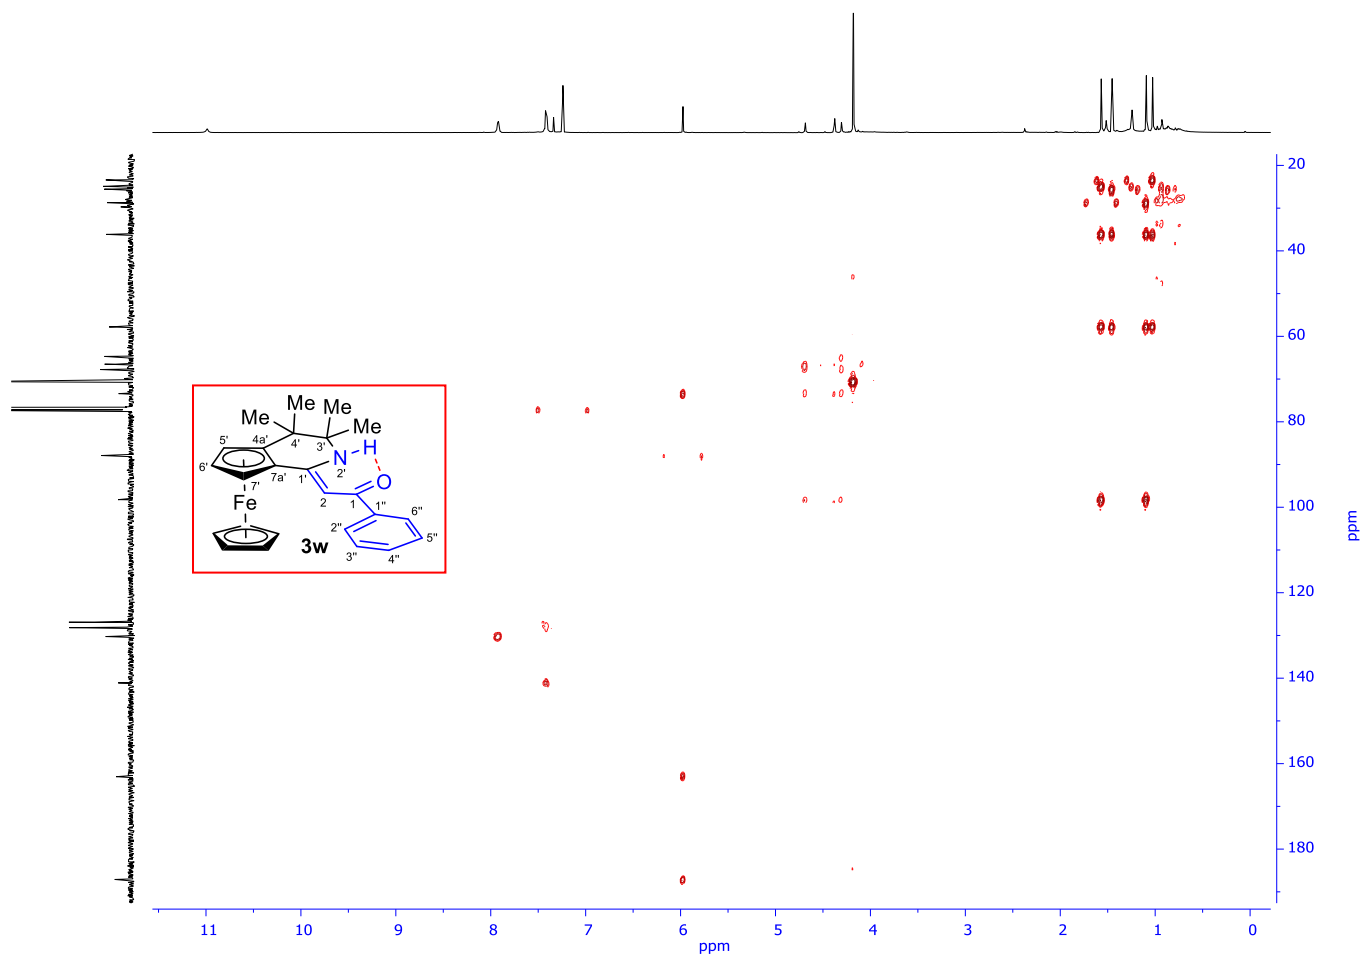

**Figure S108.** HMBC spectrum (100 MHz,  $\text{CDCl}_3$ ) of compound **3w**.

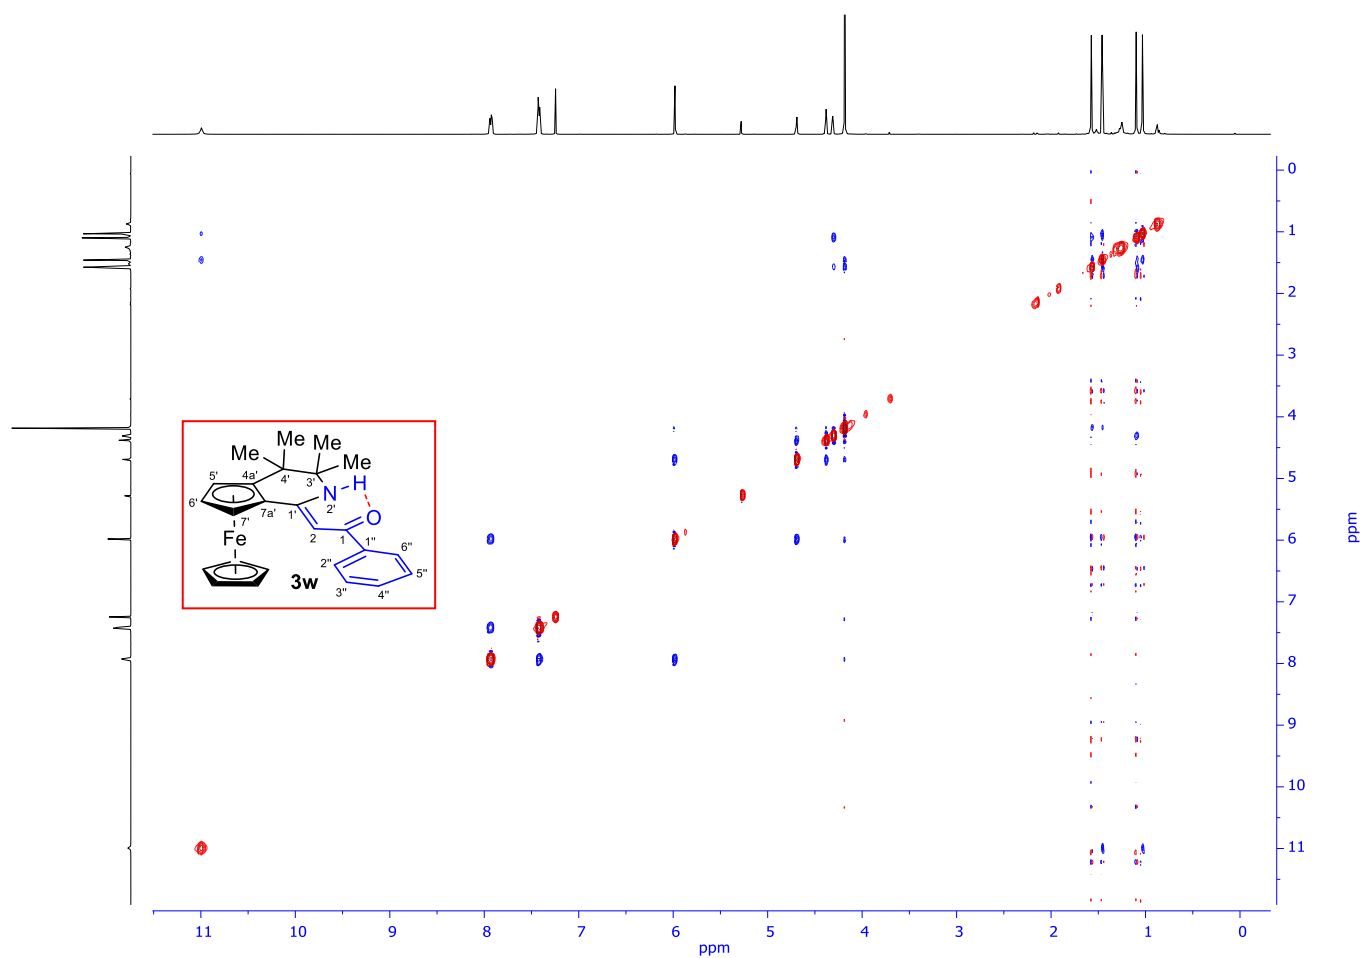

**Figure S109.** 2D NOESY spectrum (400 MHz,  $\text{CDCl}_3$ ) of compound **3w**.

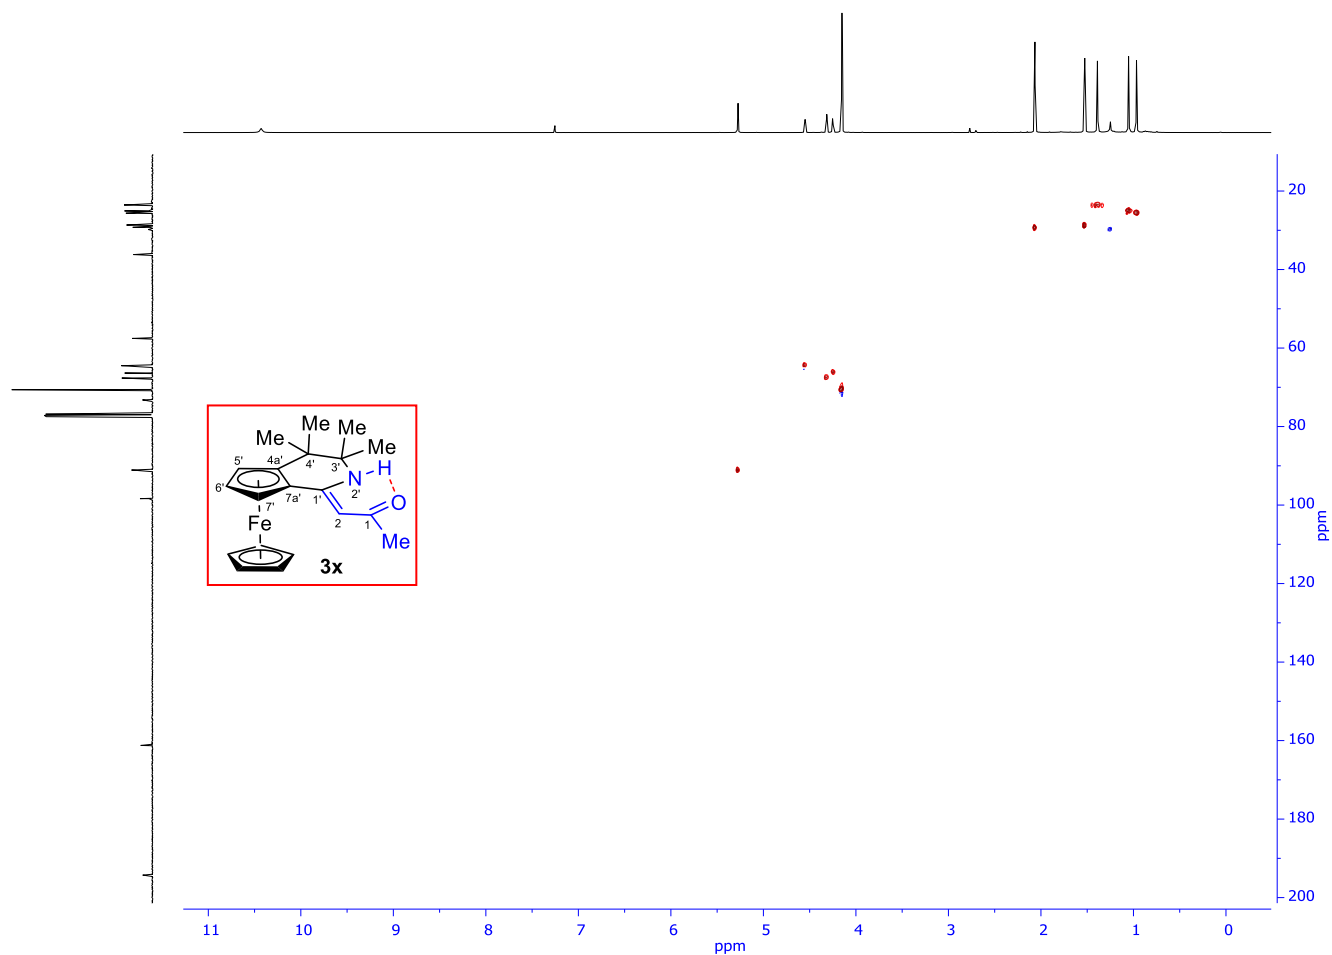

**Figure S110.** HSQC spectrum (400 MHz, CDCl<sub>3</sub>) of compound **3x**.

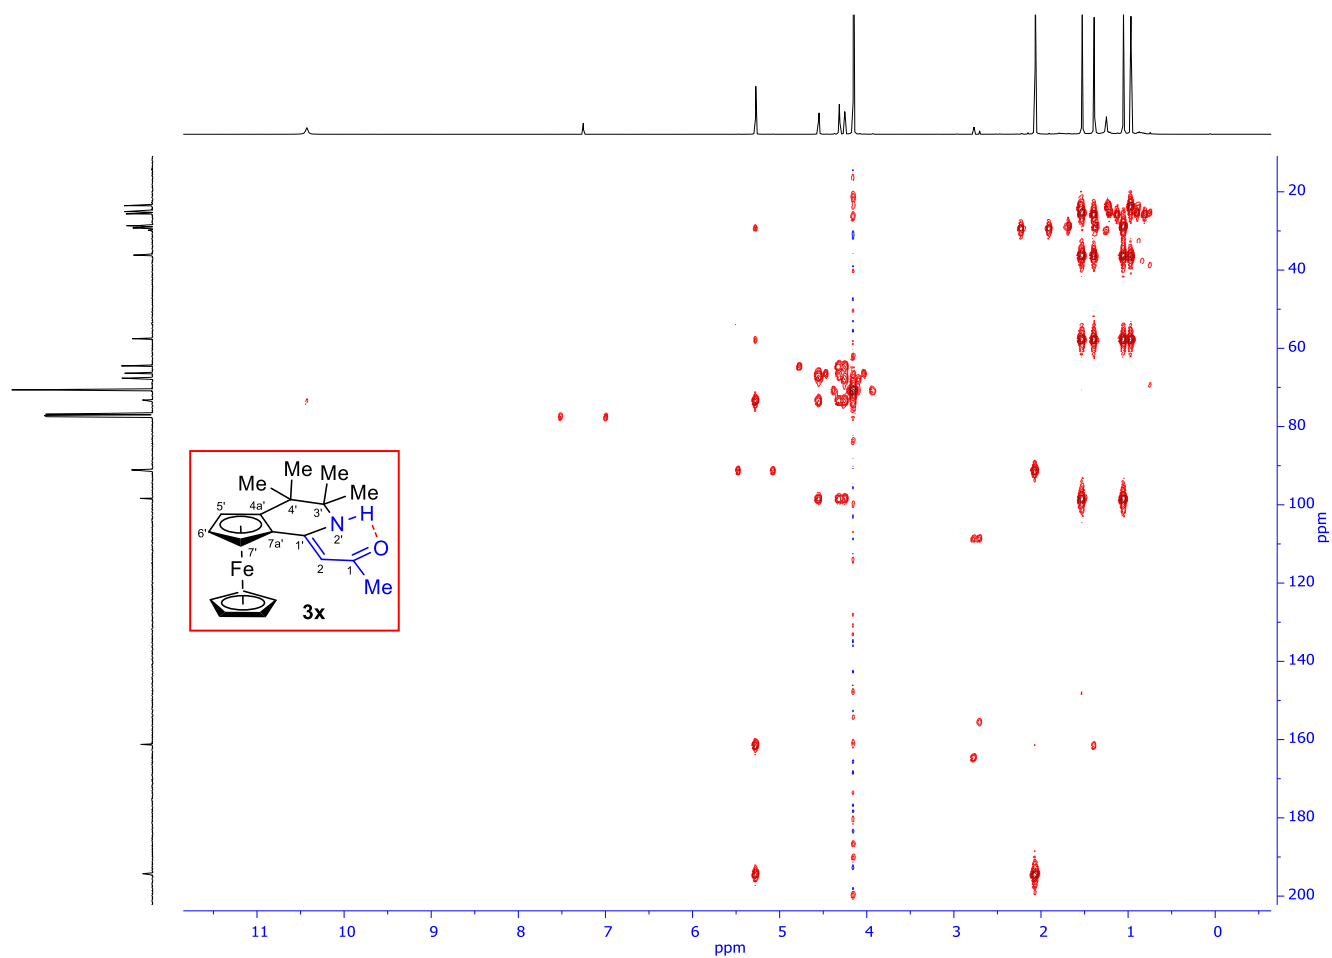

**Figure S111.** HMBC spectrum (400 MHz, CDCl<sub>3</sub>) of compound **3x**.

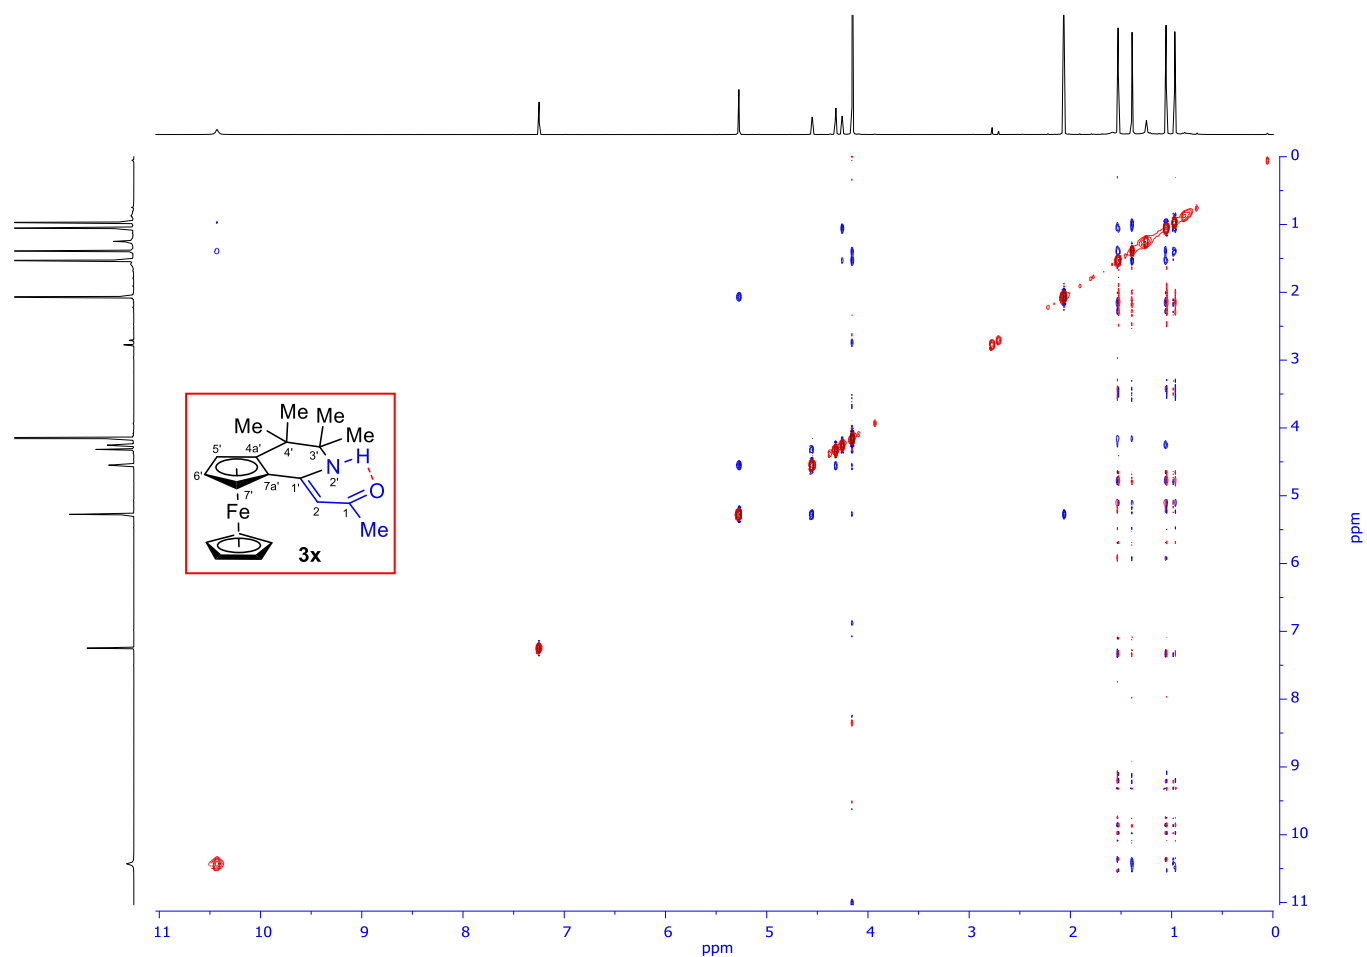

**Figure S112.** 2D NOESY spectrum (400 MHz,  $\text{CDCl}_3$ ) of compound **3x**.

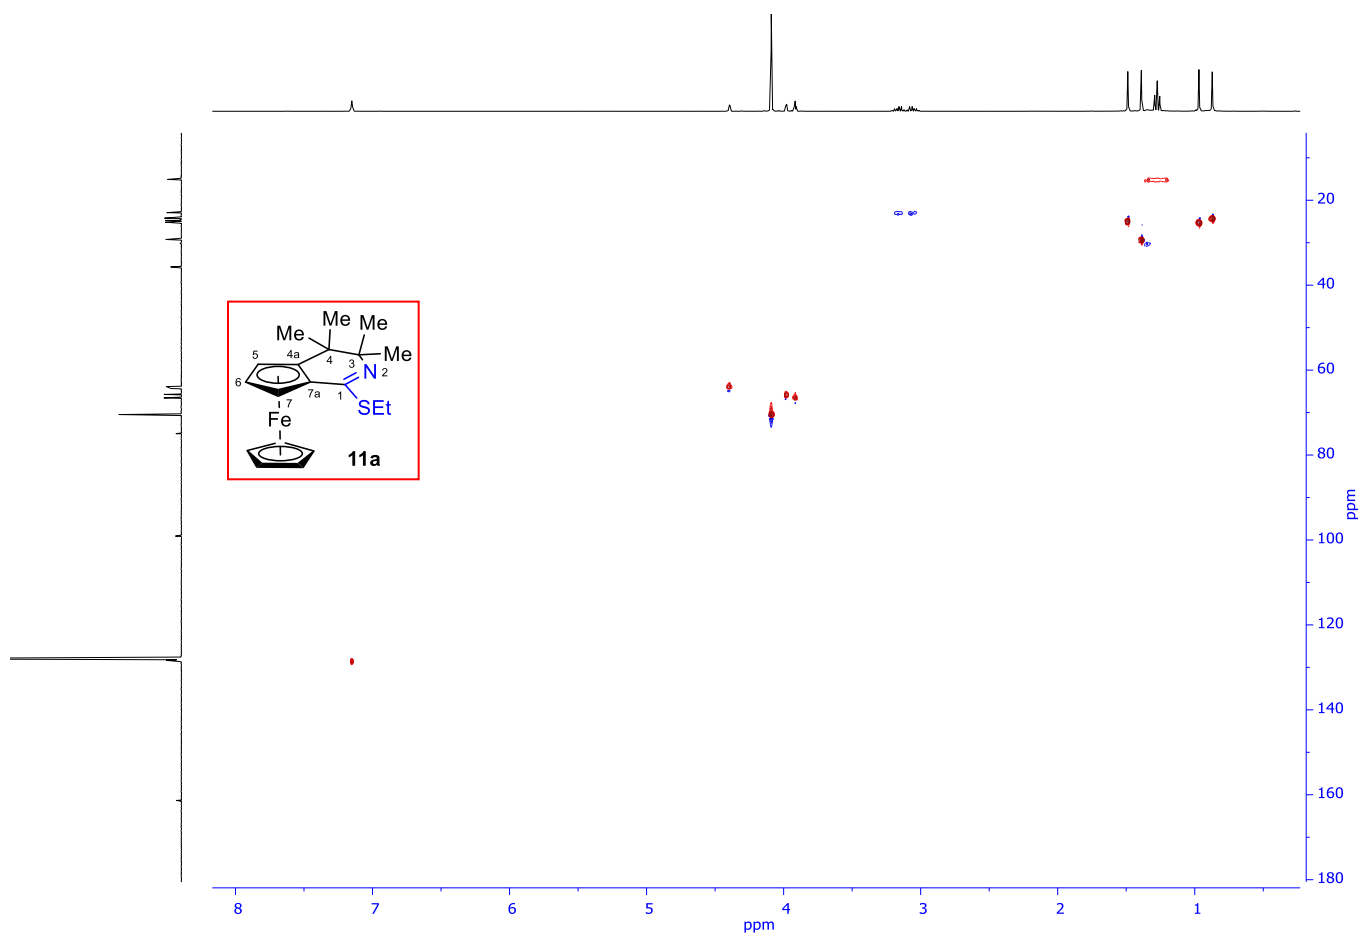

**Figure S113.** HSQC spectrum (400 MHz,  $\text{C}_6\text{D}_6$ ) of compound **11a**.



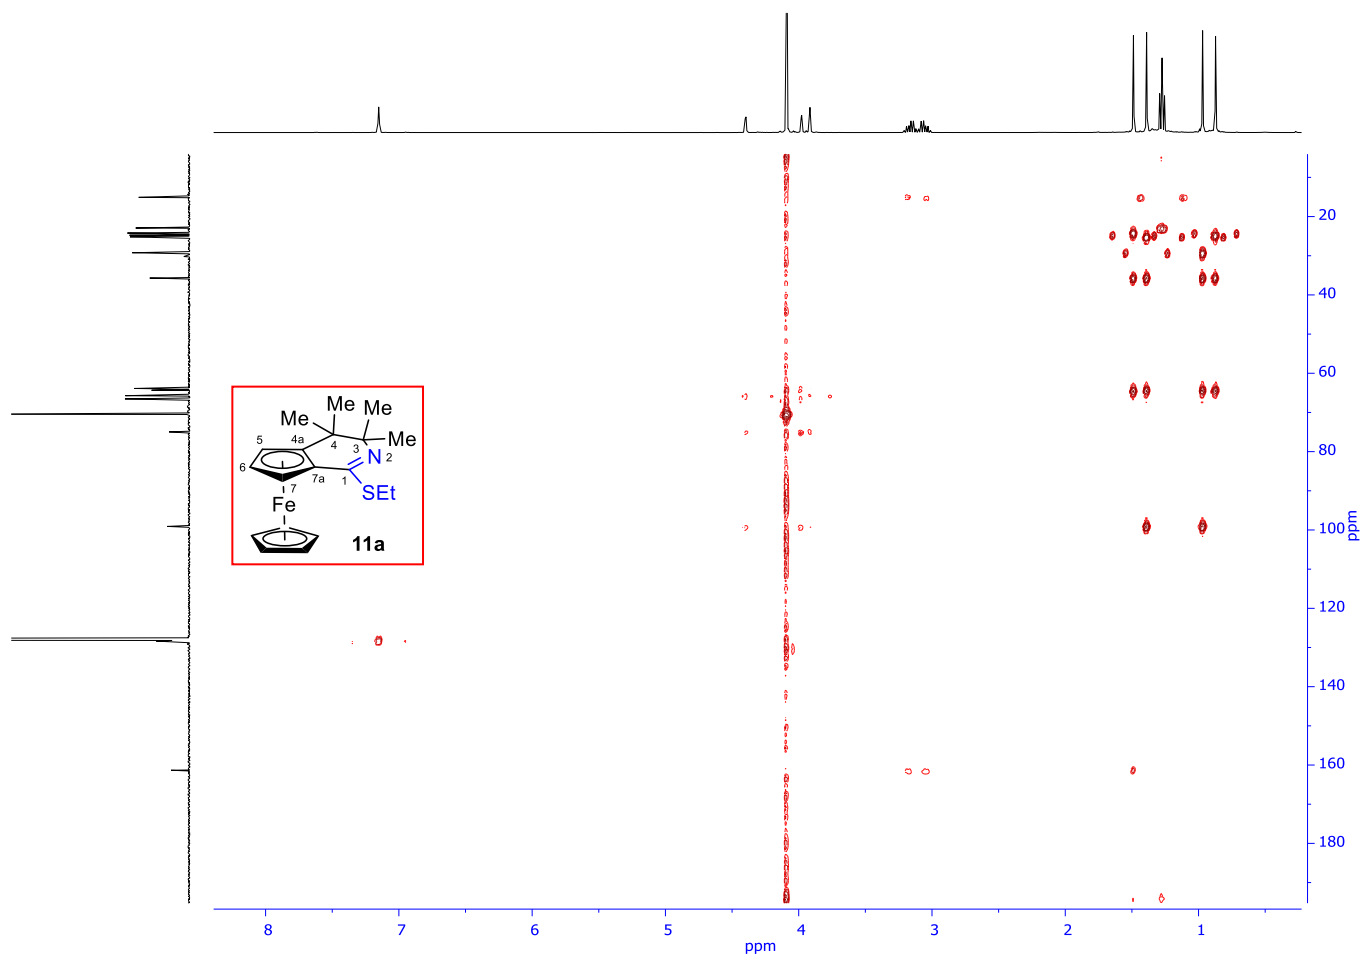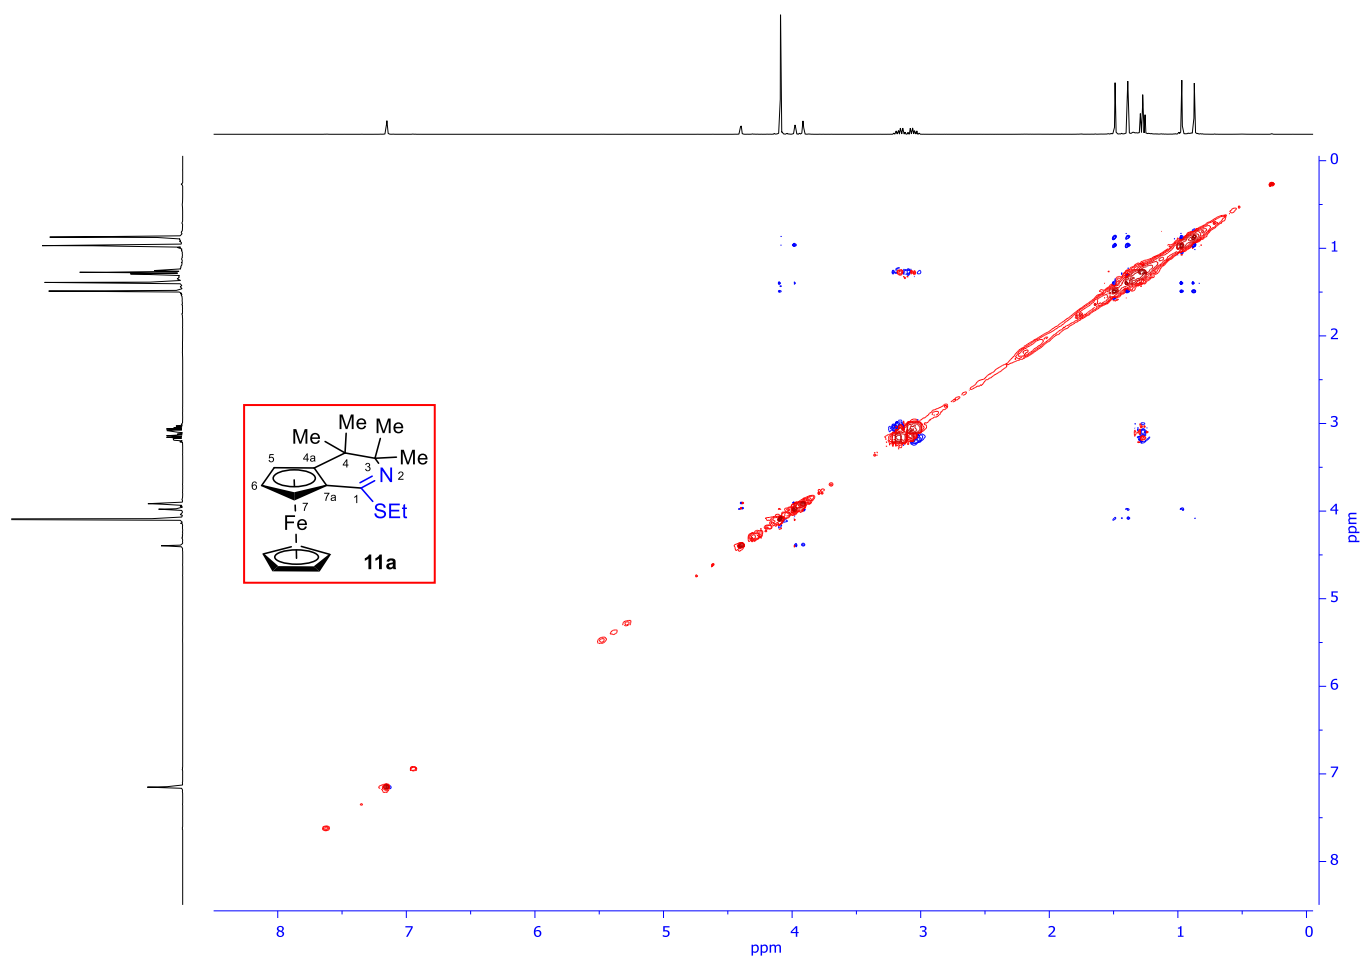

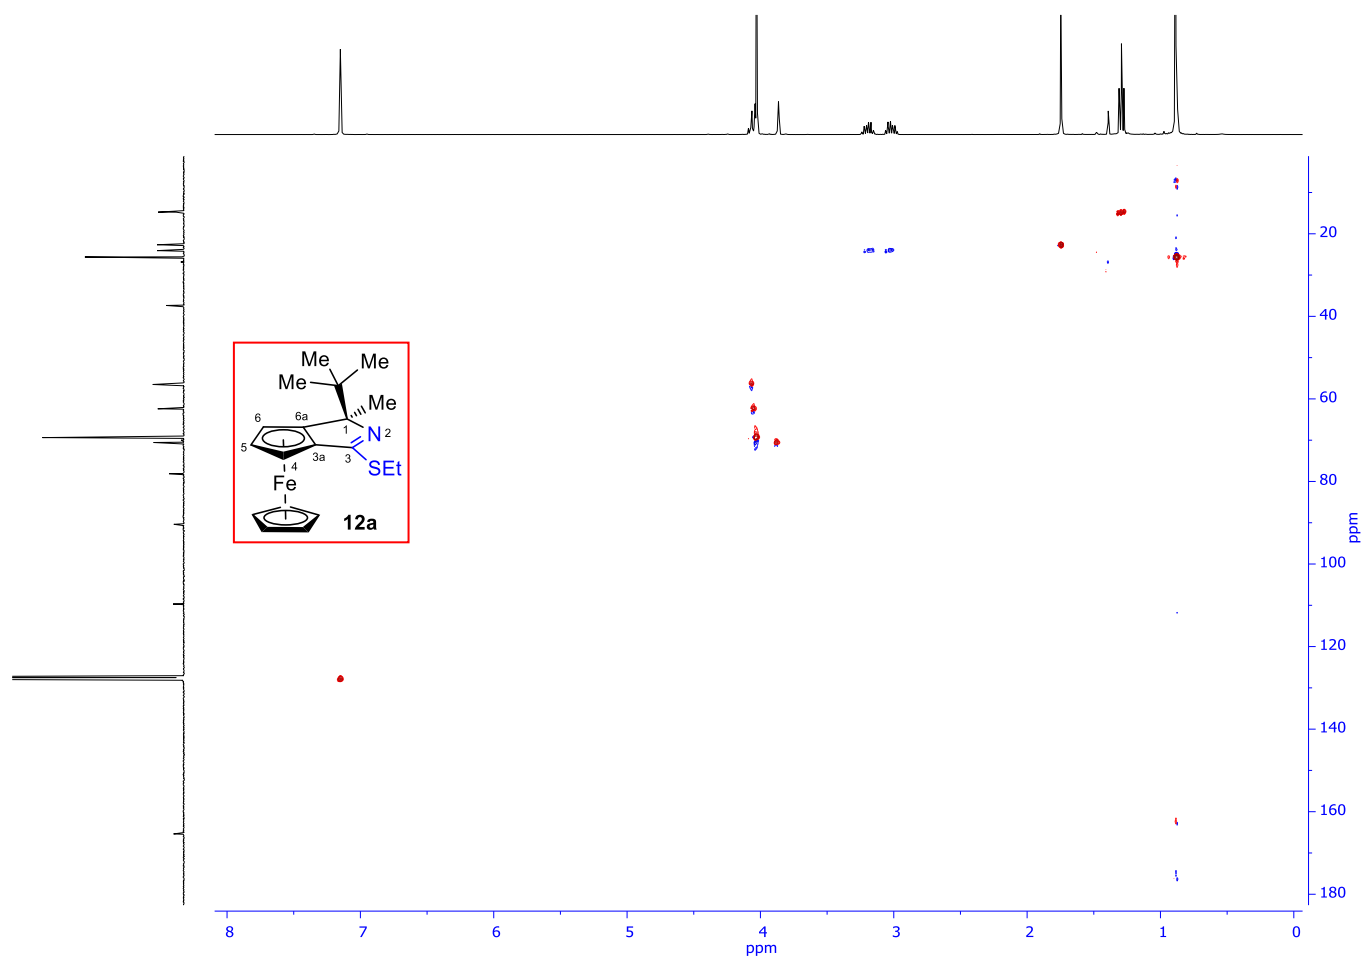

**Figure S116.** HSQC spectrum (400 MHz,  $\text{C}_6\text{D}_6$ ) of compound **12a**.

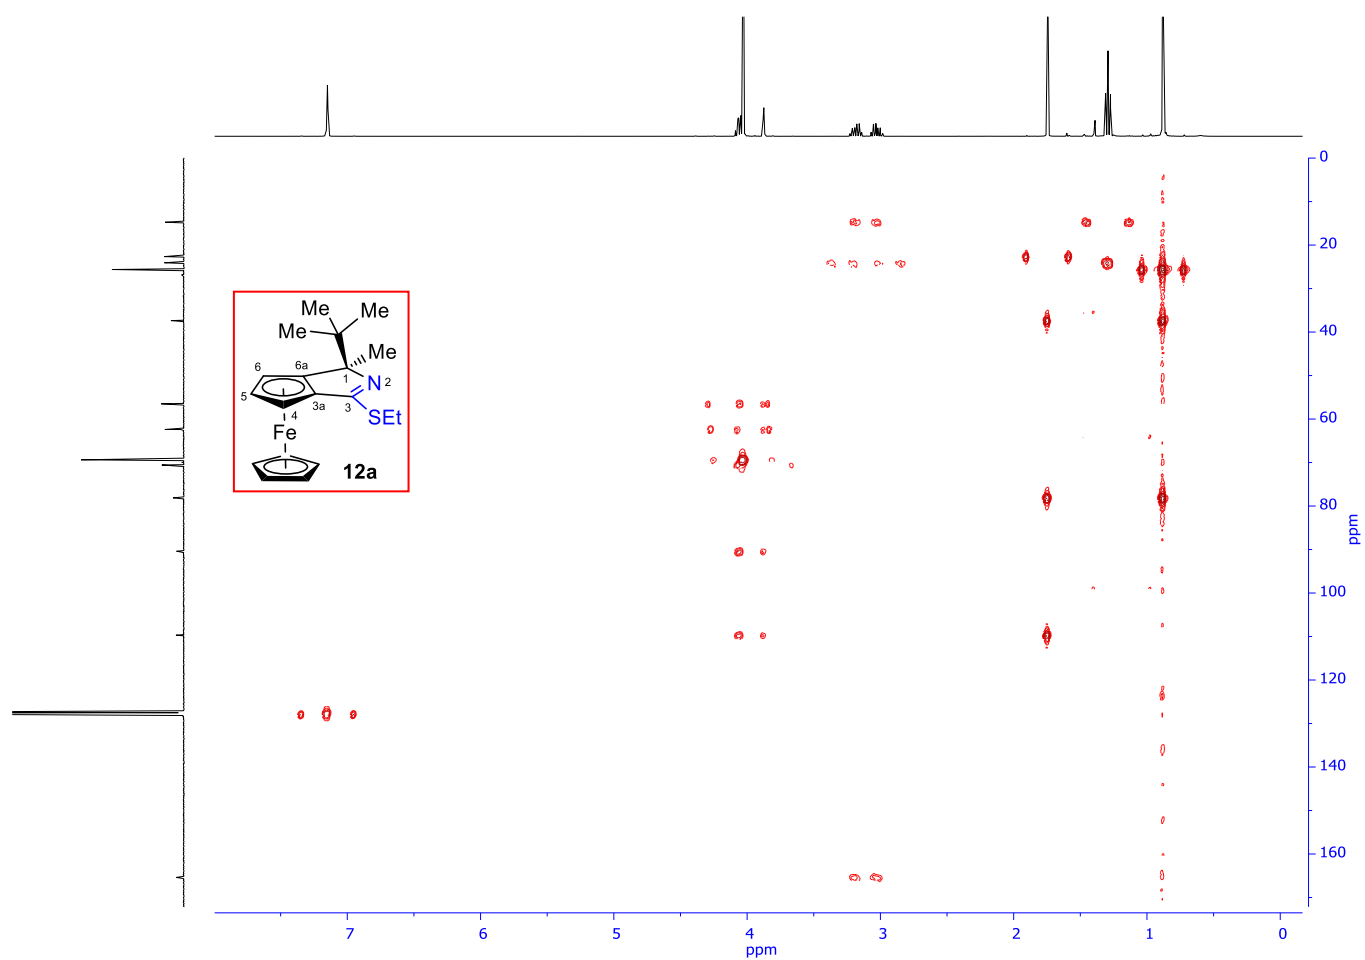

**Figure S117.** HMBC spectrum (400 MHz,  $\text{C}_6\text{D}_6$ ) of compound **12a**.

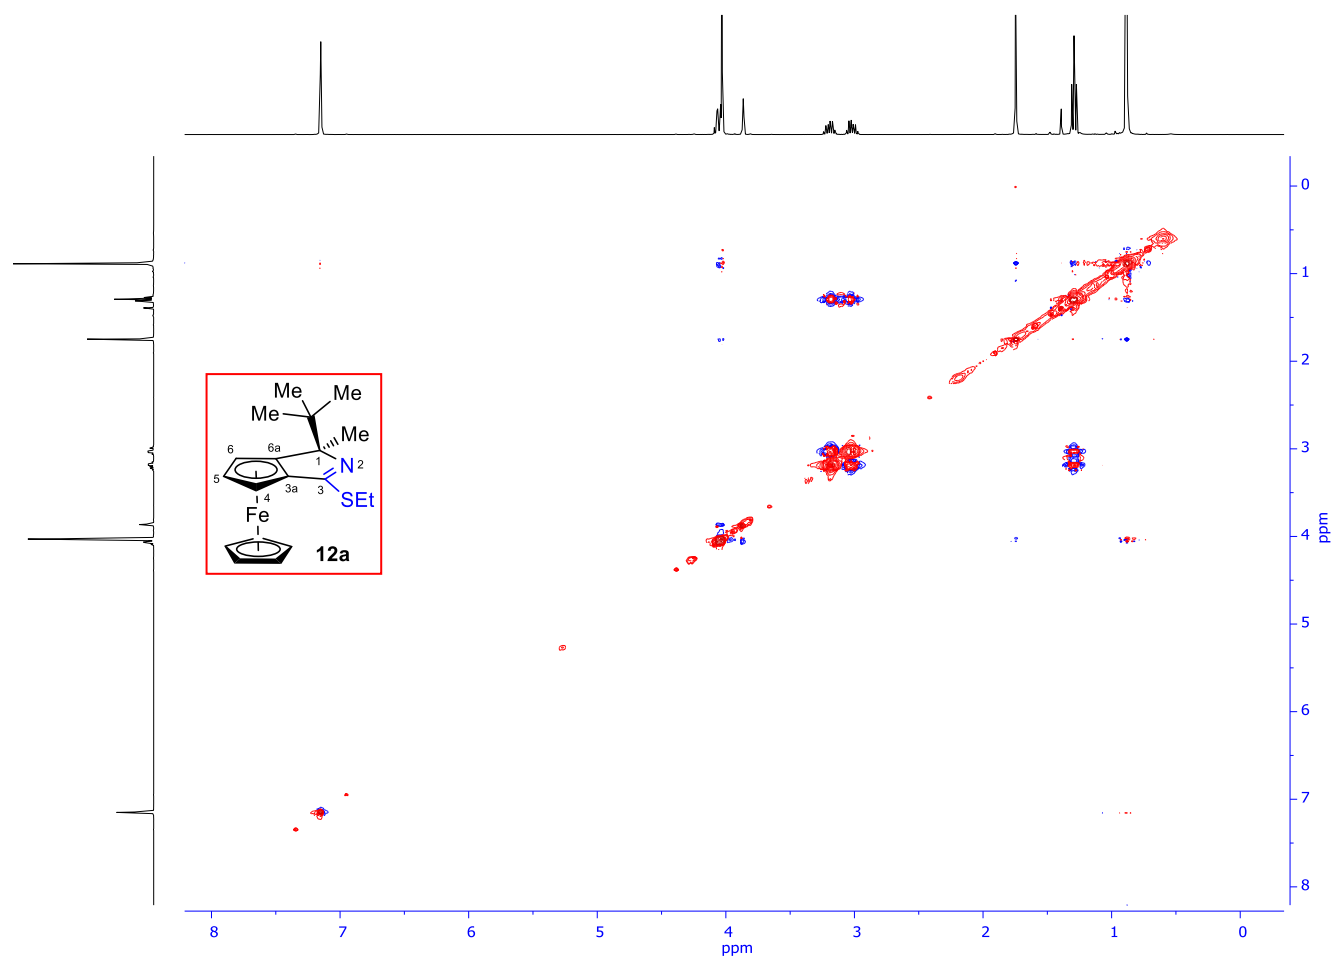

**Figure S118 . 2D NOESY spectrum (400 MHz, C<sub>6</sub>D<sub>6</sub>) of compound **12a**.**
